# Supplementary material
Source: MDPI journal article supplement (https://www.mdpi.com/2504-3129/2/1/1)
Supplement: s1 [file s1]

# Supplementary Material to: Drought Effects on Nitrogen Provisioning in Different Agricultural Systems: Insights Gained and Lessons Learned from a Field Experiment

Dominika Kundel<sup>1,2,\*</sup> Martina Lori<sup>2</sup>, Andreas Fliessbach<sup>2</sup>, Mark van Kleunen<sup>1,3</sup>, Svenja Meyer<sup>4</sup> and Paul Mäder<sup>2</sup>

1 Ecology, Department of Biology, University of Konstanz, 78464 Konstanz, Germany

2 Department of Soil Sciences, Research Institute of Organic Agriculture (FiBL), 5070 Frick, Switzerland

3 Zhejiang Provincial Key Laboratory of Plant Evolutionary Ecology and Conservation, Taizhou University, 318000 Taizhou, China

4 Animal Ecology, J.F. Blumenbach Institute for Zoology and Anthropology, University of Göttingen, 37073 Göttingen, Germany

\* Correspondence: dominika.kundel@fibl.org

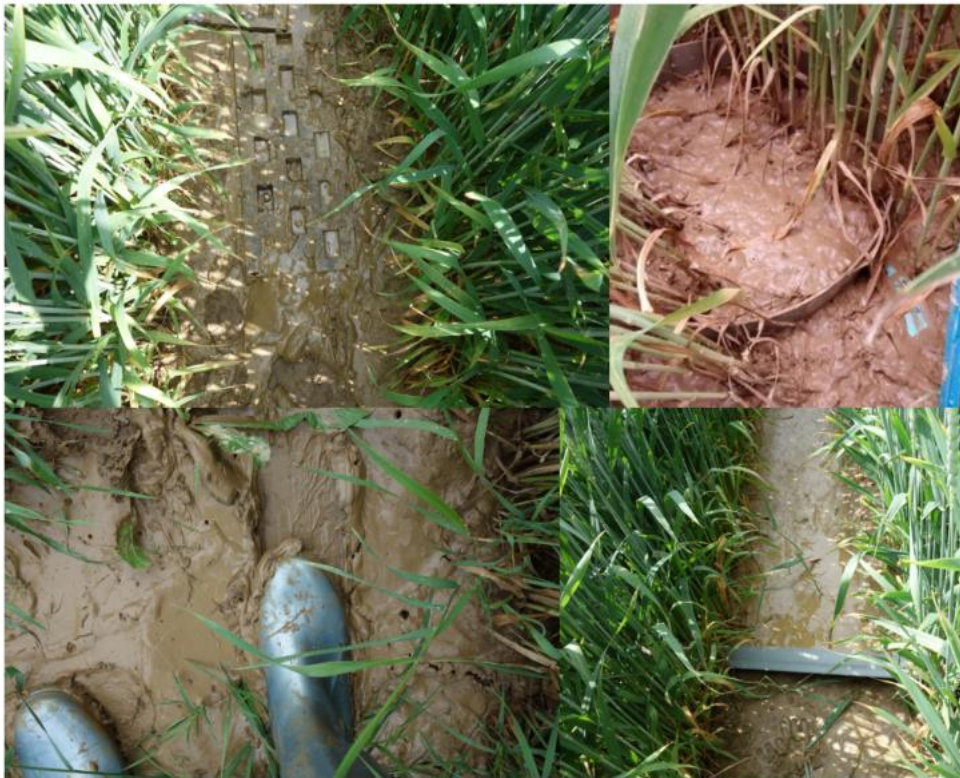

Supplementary Figure 1: Conditions at the study site after the heavy spring rainfalls. Pictures were taken around the flowering of the winter wheat, when the second sampling date was initially planned.

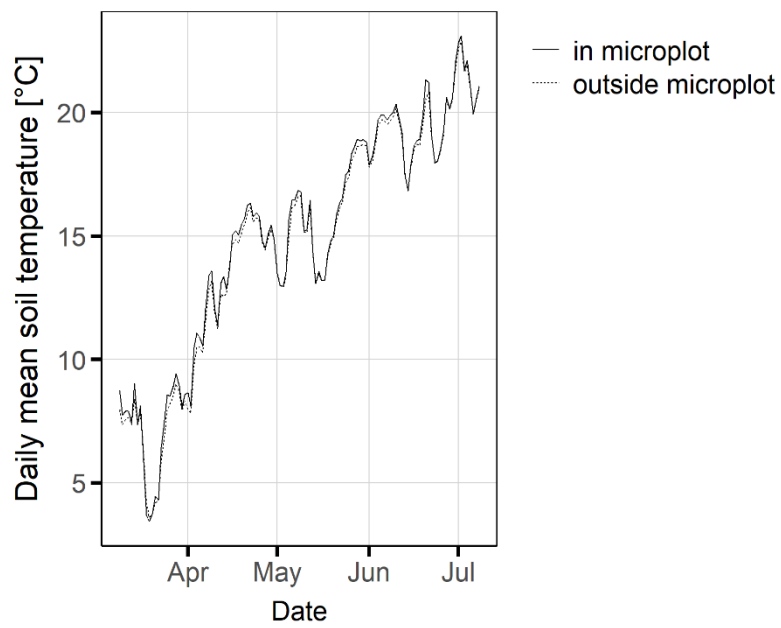

Supplementary Figure 2: Daily mean soil temperature inside ( $n = 6$  microplots) and outside of the microplots ( $n = 6$  microplots). The temperature was logged at a 0.10-m depth.

Supplementary Table 1. Soil characteristics (top 10 cm) in the biodynamic (BioDyn) and conventional (ConMin) farming systems and differences between the two farming systems as assessed from the baseline sampling. All data are medians of the posterior distribution with 95% credible intervals (CrIs), %points: percentage points. Credible intervals in bold exclude zero. Soil pH (H<sub>2</sub>O): soil pH measured in water; Ctot: total soil organic carbon; Ntot: total soil organic nitrogen; WHC: water holding capacity

| Parameter                         | BioDyn<br>median (95%CrI) | ConMin<br>median (95%CrI) | BioDyn vs ConMin    |                   |                   |
|-----------------------------------|---------------------------|---------------------------|---------------------|-------------------|-------------------|
|                                   |                           |                           | Median              | 95% CrI           | 90% CrI           |
| Soil pH (H <sub>2</sub> O)        | 6.8 [6.6, 7.0]            | 6.4 [6.2, 6.6]            | <b>0.4</b>          | <b>0.2, 0.6</b>   | <b>0.2, 0.5</b>   |
| Ctot [%]                          | 1.84 [1.44, 2.26]         | 1.35 [0.95, 1.76]         | <b>0.49% points</b> | <b>0.33, 0.66</b> | <b>0.37, 0.62</b> |
| Ntot [%]                          | 0.19 [0.15, 0.23]         | 0.14 [0.09, 0.18]         | <b>0.05% points</b> | <b>0.03, 0.07</b> | <b>0.04, 0.06</b> |
| WHC [%]                           | 40.0 [35.4, 44.3]         | 36.7 [32.1, 41.0]         | <b>3.3% points</b>  | -0.8, 7.5         | <b>0.1, 6.7</b>   |
| Bulk density [g/cm <sup>3</sup> ] | 1.23 [1.12, 1.34]         | 1.29 [1.18, 1.40]         | -0.06               | -0.14, 0.02       | -0.13, 0          |

Supplementary Table 2. Model estimates for differences in soil water content (% points) between selected treatment comparisons. Data are medians of the posterior distribution with 95% and 90% CrI. Farming system comparison is given as average over the drought treatment. Credible intervals in bold exclude zero.

| Differences<br>in soil water<br>content | Comparison    |        | Sampling<br>date | Model estimate<br>(median) | 95% CrI            | 90% CrI            |
|-----------------------------------------|---------------|--------|------------------|----------------------------|--------------------|--------------------|
|                                         | R-RC          | BioDyn | T1               | -1.7                       | -5.5, 1.8          | -4.8, 1.1          |
|                                         | R-RC          | ConMin | T1               | -1.4                       | -5.0, 2.0          | -4.3, 1.4          |
|                                         | R-RC          | BioDyn | T2               | <b>-3.6</b>                | <b>-7.3, -0.3</b>  | <b>-6.6, -0.9</b>  |
|                                         | R-RC          | ConMin | T2               | <b>-5.5</b>                | <b>-10.3, -1.5</b> | <b>-9.3, -2.2</b>  |
|                                         | BioDyn-ConMin |        | T1               | 0.7                        | -6.4, 8.2          | -4.9, 6.6          |
|                                         | BioDyn-ConMin |        | T2               | <b>-8.3</b>                | <b>-16.7, -0.8</b> | <b>-14.7, -2.3</b> |

Supplementary Table 3. Model estimates for differences in plant dry weight (DW) and plant N content between selected treatment comparisons. Data are medians of the posterior distribution with 95% and 90% CrI. Farming system comparison is given as average over the drought treatment. Credible intervals in bold exclude zero.

| Response                  | Comparison    |        | Sampling date | Model estimate (median) | 95% CrI             | 90% CrI             |
|---------------------------|---------------|--------|---------------|-------------------------|---------------------|---------------------|
| Plant DW<br>(g/microplot) | R-RC          | BioDyn | T1            | -1.27                   | -19.17, 16.49       | -15.90, 13.56       |
|                           | R-RC          | ConMin | T1            | -3.15                   | -20.89, 14.62       | -17.94, 11.33       |
|                           | R-RC          | BioDyn | T2            | -10.66                  | -29.64, 8.99        | -26.39, 5.5         |
|                           | R-RC          | ConMin | T2            | -11.94                  | -29.76, 5.90        | -26.63, 2.76        |
|                           | BioDyn-ConMin |        | T1            | <b>28.26</b>            | -2.65, 59.65        | <b>3.1, 53.27</b>   |
|                           | BioDyn-ConMin |        | T2            | -9.45                   | -41.34, 23.19       | -35.27, 16.49       |
| Plant N<br>(g/microplot)  | R-RC          | BioDyn | T1            | -0.28                   | -0.69, 0.15         | -0.62, 0.07         |
|                           | R-RC          | ConMin | T1            | <b>-0.46</b>            | <b>-0.87, -0.05</b> | <b>-0.79, -0.12</b> |
|                           | R-RC          | BioDyn | T2            | -0.31                   | -0.76, 0.15         | -0.68, 0.07         |
|                           | R-RC          | ConMin | T2            | -0.29                   | -0.72, 0.12         | -0.64, 0.05         |
|                           | BioDyn-ConMin |        | T1            | 0.37                    | -0.34, 1.10         | -0.21, 0.96         |
|                           | BioDyn-ConMin |        | T2            | -0.17                   | -0.92, 0.59         | -0.78, 0.44         |

Supplementary Table 4. Model estimates for differences in N derived from fertiliser (Ndff), and N derived from the soil (Ndfs) pool between selected treatment comparisons. Data are medians of the posterior distribution with 95% and 90% CrI. Farming system comparison is given as averages over the drought treatment. Credible intervals in bold exclude zero.

| Response              | Comparison    |        | Sampling date | Model estimate (median) | 95% CrI             | 90% CrI             |
|-----------------------|---------------|--------|---------------|-------------------------|---------------------|---------------------|
| Ndff<br>(g/microplot) | R-RC          | BioDyn | T1            | <b>-0.13</b>            | <b>-0.29, -0.03</b> | <b>-0.25, -0.04</b> |
|                       | R-RC          | ConMin | T1            | <b>-0.11</b>            | <b>-0.25, -0.01</b> | <b>-0.22, -0.02</b> |
|                       | R-RC          | BioDyn | T2            | -0.01                   | -0.22, 0.21         | -0.18, 0.17         |
|                       | R-RC          | ConMin | T2            | -0.10                   | -0.35, 0.10         | -0.29, 0.06         |
|                       | BioDyn-ConMin |        | T1            | 0.03                    | -0.19, 0.25         | -0.13, 0.20         |
|                       | BioDyn-ConMin |        | T2            | -0.08                   | -0.49, 0.32         | -0.40, 0.23         |
| Ndfs<br>(g/microplot) | R-RC          | BioDyn | T1            | -0.13                   | -0.47, 0.19         | -0.41, 0.13         |
|                       | R-RC          | ConMin | T1            | <b>-0.32</b>            | <b>-0.64, -0.04</b> | <b>-0.58, -0.09</b> |
|                       | R-RC          | BioDyn | T2            | -0.30                   | -0.73, 0.14         | -0.65, 0.06         |
|                       | R-RC          | ConMin | T2            | -0.18                   | -0.60, 0.20         | -0.52, 0.13         |
|                       | BioDyn-ConMin |        | T1            | 0.32                    | -0.20, 0.90         | -0.09, 0.78         |
|                       | BioDyn-ConMin |        | T2            | -0.08                   | -0.79, 0.66         | -0.66, 0.51         |
