# Supplementary material
Source: MDPI journal article supplement (https://www.mdpi.com/2504-3129/2/1/1)
Supplement: s1 [file s1]

Archive with 2 entries (2 files):
- Kundel_et_al_Data.xlsx
- nitrogen-1033419-supplementary.pdf
