# Supplementary material
Source: MDPI journal article supplement (https://www.mdpi.com/2504-3129/2/1/1)
Supplement: s1 [file s1 › Kundel_et_al_Data.xlsx]

## Sheet: readme
Consider comments related to the second sampling date when reusing the data (outlined in the main manuscript)
Legend
sheet1
Plot	Field plot identification number
Block	Field Block identification number
Treatment	Drought treatment, R: rainout shelter, RC: rainout shelter control
System	CONMIN: conventional farming system; BIODYN: biodynamic farming system
Sampling	Sampling time point as outlined in the manuscript
Depth	sampling depth
Ntot	Total soil nitrogen [%]
Ctot	Total soil carbon [%]
mWHC	maximum water holding capacity [%]
BD_g_cm3	Bulk density (g/cm3)
pH	soil PH
N_RS_g_cylinder	Plant N content per microplot (sum of root and shoot) in gram
Ndff_SR_g_cylinder	N derived from fertilizer per microplot (sum of root and shoot) in gram
REC_RS_percent	Recovery of N from the labeled fertilizer (as recovered in root and shoot) in percent
Ndfs_RS_g_cly	N derived from soil per microplot (sum of root and shoot) in gram
root_g_cylinder	root biomass per microplot in gram
shoot_g_cylinder	shoot biomass per microplot in gram
u2	soil water content in percent
NA	not applicable (no data collected)
sheet2
Date	Day.Month.Year
Precipitation	Precipitation amount in mm
DataOrigin	Data origin: Field station (DOK); backup station in the DOK (BackupStation), or nearby station (BielBenken)
sheet3
Date	Day.Month.Year
Time	Time
Plot	Field plot identification number
Treatment	Drought treatment, R: rainout shelter, RC: rainout shelter control, C: open field
Position	inside microplot (in_cylinder) or outside (out_clinder)
Compartment	logger position (here soil)
Depth	logger position depth in m
Temperature	recoded temperature in °C
sheet4
Date	Day.Month.Year
Time	Time
Plot	Field plot identification number
Treatment	Drought treatment, R: rainout shelter, RC: rainout shelter control, C: open field
Compartment	logger position (here air)
Height	logger position height in m
Temperature	recoded temperature in °C

## Sheet: sheet1
Plot	Block	Treatment	System	Sampling	Depth	Ntot	Ctot	mWHC	BD_g_cm3	pH	N_RS_g_cylinder	Ndff_SR_g_cylinder	REC_RS_percent	Ndfs_RS_g_cly	root_g_cylinder	shoot_g_cylinder	u2
4	A	R	CONMIN	T0	10	0.141	1.401	35	1.34	6.35	NA	NA	NA	NA	NA	NA	28.02
4	A	RC	CONMIN	T0	10	0.142	1.384	39.52	1.2	6.66	NA	NA	NA	NA	NA	NA	30.61
10	A	R	BIODYN	T0	10	0.181	1.803	36.2	1.3	6.83	NA	NA	NA	NA	NA	NA	29.99
10	A	RC	BIODYN	T0	10	0.19	1.897	37.91	1.22	6.67	NA	NA	NA	NA	NA	NA	34.58
38	B	R	CONMIN	T0	10	0.117	1.19	32.67	1.35	6.32	NA	NA	NA	NA	NA	NA	26.25
38	B	RC	CONMIN	T0	10	0.123	1.236	34.63	1.34	6.09	NA	NA	NA	NA	NA	NA	30.16
44	B	R	BIODYN	T0	10	0.166	1.623	38.91	1.26	6.8	NA	NA	NA	NA	NA	NA	29.3
44	B	RC	BIODYN	T0	10	0.173	1.7	37.4	1.3	6.81	NA	NA	NA	NA	NA	NA	32.66
54	C	R	BIODYN	T0	10	0.179	1.754	42.27	1.2	6.76	NA	NA	NA	NA	NA	NA	31.29
54	C	RC	BIODYN	T0	10	0.184	1.792	41.69	1.21	6.78	NA	NA	NA	NA	NA	NA	32.23
60	C	R	CONMIN	T0	10	0.126	1.203	38.06	1.27	6.47	NA	NA	NA	NA	NA	NA	26.54
60	C	RC	CONMIN	T0	10	0.132	1.288	39.27	1.25	6.38	NA	NA	NA	NA	NA	NA	31.78
88	D	R	BIODYN	T0	10	0.226	2.224	46.42	1.14	6.74	NA	NA	NA	NA	NA	NA	27.98
88	D	RC	BIODYN	T0	10	0.199	1.908	39.29	1.2	6.77	NA	NA	NA	NA	NA	NA	33.09
94	D	R	CONMIN	T0	10	0.155	1.491	36.26	1.33	6.42	NA	NA	NA	NA	NA	NA	25.95
94	D	RC	CONMIN	T0	10	0.163	1.564	37.92	1.24	6.39	NA	NA	NA	NA	NA	NA	30.62
4	A	R	CONMIN	T1	10	NA	NA	NA	NA	NA	1.42	0.25	18.99	1.17	10.048	62.43	11.31
4	A	RC	CONMIN	T1	10	NA	NA	NA	NA	NA	1.39	0.32	24.59	1.07	11.744	58.2	13.98
10	A	R	BIODYN	T1	10	NA	NA	NA	NA	NA	1.84	0.3	22.64	1.54	9.952	81.66	11.91
10	A	RC	BIODYN	T1	10	NA	NA	NA	NA	NA	1.85	0.37	28.41	1.48	13.072	84	13.47
38	B	R	CONMIN	T1	10	NA	NA	NA	NA	NA	1.3	0.21	16.26	1.09	9.68	72.31	10.75
38	B	RC	CONMIN	T1	10	NA	NA	NA	NA	NA	1.87	0.36	27.84	1.51	11.296	71.99	11.78
44	B	R	BIODYN	T1	10	NA	NA	NA	NA	NA	1.56	0.24	18.09	1.32	8.64	77.21	11.18
44	B	RC	BIODYN	T1	10	NA	NA	NA	NA	NA	1.57	0.25	19.18	1.32	5.952	74.08	13.11
54	C	R	BIODYN	T1	10	NA	NA	NA	NA	NA	1.74	0.23	17.68	1.51	17.392	71.16	11.56
54	C	RC	BIODYN	T1	10	NA	NA	NA	NA	NA	2.11	0.34	26.12	1.77	11.728	86.36	13.41
60	C	R	CONMIN	T1	10	NA	NA	NA	NA	NA	1.45	0.21	15.86	1.24	15.04	62.08	10.17
60	C	RC	CONMIN	T1	10	NA	NA	NA	NA	NA	2.15	0.37	28.35	1.78	8.688	68.04	10.97
88	D	R	BIODYN	T1	10	NA	NA	NA	NA	NA	1.32	0.1	7.34	1.22	8.688	81.71	14.6
88	D	RC	BIODYN	T1	10	NA	NA	NA	NA	NA	1.97	0.41	31.5	1.56	13.84	72.23	14.17
94	D	R	CONMIN	T1	10	NA	NA	NA	NA	NA	1.17	0.14	10.77	1.03	6.32	58.11	12.5
94	D	RC	CONMIN	T1	10	NA	NA	NA	NA	NA	1.76	0.21	15.75	1.55	13.603	65.47	15.2
4	A	R	CONMIN	T2	10	NA	NA	NA	NA	NA	2	0.44	33.78	1.55	18.256	168.44	10.44
4	A	RC	CONMIN	T2	10	NA	NA	NA	NA	NA	2.04	0.51	38.78	1.53	14.832	152.54	16.03
10	A	R	BIODYN	T2	10	NA	NA	NA	NA	NA	2.31	0.63	47.78	1.69	14.016	179.09	28.33
10	A	RC	BIODYN	T2	10	NA	NA	NA	NA	NA	2.11	0.59	45.33	1.52	12.848	163.58	12.42
38	B	R	CONMIN	T2	10	NA	NA	NA	NA	NA	2.05	0.48	36.3	1.58	17.344	167.14	14.87
38	B	RC	CONMIN	T2	10	NA	NA	NA	NA	NA	3.03	0.77	59.08	2.25	8.576	198.6	25.45
44	B	R	BIODYN	T2	10	NA	NA	NA	NA	NA	2.05	0.42	32.19	1.62	16.56	180.94	9.8
44	B	RC	BIODYN	T2	10	NA	NA	NA	NA	NA	2.91	0.54	41.08	2.37	10.224	201.89	12.53
54	C	R	BIODYN	T2	10	NA	NA	NA	NA	NA	2.03	0.57	43.44	1.46	12.992	168.2	8.96
54	C	RC	BIODYN	T2	10	NA	NA	NA	NA	NA	2.31	0.35	26.41	1.96	14.208	184.3	12.25
60	C	R	CONMIN	T2	10	NA	NA	NA	NA	NA	2.41	0.5	37.87	1.91	12.512	176.66	9.68
60	C	RC	CONMIN	T2	10	NA	NA	NA	NA	NA	2.42	0.47	35.9	1.95	16.672	196.8	13.15
88	D	R	BIODYN	T2	10	NA	NA	NA	NA	NA	2.11	0.32	24.29	1.79	10.624	154.37	11.69
88	D	RC	BIODYN	T2	10	NA	NA	NA	NA	NA	2.27	0.42	32.26	1.85	9.84	168.76	13.86
94	D	R	CONMIN	T2	10	NA	NA	NA	NA	NA	2.17	0.38	29.11	1.79	13.296	165.31	11.83
94	D	RC	CONMIN	T2	10	NA	NA	NA	NA	NA	2.4	0.5	38.39	1.89	15.088	183.31	14.07

## Sheet: sheet2
Date	Precipitation	DataOrigin
2018-02-17	15.2	DOK
2018-02-18	2	DOK
2018-02-19	0	DOK
2018-02-20	0	DOK
2018-02-21	0	DOK
2018-02-22	0	DOK
2018-02-23	0	DOK
2018-02-24	0	DOK
2018-02-25	0	DOK
2018-02-26	0	DOK
2018-02-27	0	DOK
2018-02-28	0	DOK
2018-03-01	0	DOK
2018-03-02	0.2	DOK
2018-03-03	4.6	DOK
2018-03-04	0.4	DOK
2018-03-05	0	DOK
2018-03-06	0.4	DOK
2018-03-07	4	DOK
2018-03-08	0	DOK
2018-03-09	0	DOK
2018-03-10	5	DOK
2018-03-11	4.6	DOK
2018-03-12	2	DOK
2018-03-13	0.4	DOK
2018-03-14	0	DOK
2018-03-15	0	DOK
2018-03-16	0.2	DOK
2018-03-17	6	DOK
2018-03-18	0.2	DOK
2018-03-19	2.6	DOK
2018-03-20	2.6	DOK
2018-03-21	2.2	DOK
2018-03-22	1	DOK
2018-03-23	0	DOK
2018-03-24	0.2	DOK
2018-03-25	0	DOK
2018-03-26	0.2	DOK
2018-03-27	0.4	DOK
2018-03-28	9.8	DOK
2018-03-29	1.8	DOK
2018-03-30	6.4	DOK
2018-03-31	1.4	DOK
2018-04-01	1.2	DOK
2018-04-02	0.2	DOK
2018-04-03	0	DOK
2018-04-04	4.8	DOK
2018-04-05	1	DOK
2018-04-06	0.2	DOK
2018-04-07	0	DOK
2018-04-08	0	DOK
2018-04-09	0	DOK
2018-04-10	0	DOK
2018-04-11	0	DOK
2018-04-12	0	DOK
2018-04-13	0.4	DOK
2018-04-14	0	DOK
2018-04-15	0	DOK
2018-04-16	0	DOK
2018-04-17	0	DOK
2018-04-18	0	DOK
2018-04-19	0	DOK
2018-04-20	0	DOK
2018-04-21	0	DOK
2018-04-22	0	DOK
2018-04-23	0.4	DOK
2018-04-24	0	DOK
2018-04-25	0	DOK
2018-04-26	0.2	DOK
2018-04-27	0	DOK
2018-04-28	2.8	DOK
2018-04-29	0.2	DOK
2018-04-30	5	DOK
2018-05-01	0	DOK
2018-05-02	0	DOK
2018-05-03	1	DOK
2018-05-04	0	DOK
2018-05-05	0	DOK
2018-05-06	0	DOK
2018-05-07	0	DOK
2018-05-08	0.2	DOK
2018-05-09	0.2	DOK
2018-05-10	19	DOK
2018-05-11	0	BielBenken
2018-05-12	2.8	BielBenken
2018-05-13	0.2	BielBenken
2018-05-14	3.8	BielBenken
2018-05-15	10.2	BielBenken
2018-05-16	11.8	BielBenken
2018-05-17	10.8	BielBenken
2018-05-18	0.2	BielBenken
2018-05-19	0.2	BielBenken
2018-05-20	0.2	BielBenken
2018-05-21	0	BielBenken
2018-05-22	0	BielBenken
2018-05-23	0	BielBenken
2018-05-24	0.2	BielBenken
2018-05-25	0	BielBenken
2018-05-26	0	BielBenken
2018-05-27	19.4	BielBenken
2018-05-28	4.6	BielBenken
2018-05-29	1.6	BackupStation
2018-05-30	3.4	BackupStation
2018-05-31	20.8	BackupStation
2018-06-01	1	BackupStation
2018-06-02	0	BackupStation
2018-06-03	3.6	DOK
2018-06-04	4.6	DOK
2018-06-05	0	DOK
2018-06-06	3.6	DOK
2018-06-07	0.2	DOK
2018-06-08	5.4	DOK
2018-06-09	0	DOK
2018-06-10	0	DOK
2018-06-11	0	DOK
2018-06-12	0.2	DOK
2018-06-13	0	DOK
2018-06-14	0	DOK
2018-06-15	0	DOK
2018-06-16	0	DOK
2018-06-17	0	DOK
2018-06-18	0	DOK
2018-06-19	0	DOK
2018-06-20	0.2	DOK
2018-06-21	0	DOK
2018-06-22	0	DOK
2018-06-23	0	DOK
2018-06-24	0	DOK
2018-06-25	0	DOK
2018-06-26	0	DOK
2018-06-27	0	DOK
2018-06-28	0	DOK
2018-06-29	0.2	DOK
2018-06-30	0	DOK
2018-07-01	0	DOK
2018-07-02	0	DOK
2018-07-03	11	DOK
2018-07-04	0	DOK
2018-07-05	16.2	DOK
2018-07-06	12.2	DOK
2018-07-07	0	DOK
2018-07-08	0	DOK
2018-07-09	0	DOK

## Sheet: sheet3
Date	Time	Plot	Treatment	Position	Compartment	Depth	Temperature
2018-03-09	18:00:00	54	R	in_cylinder	soil	0.1	11.2
2018-03-09	19:00:00	54	R	in_cylinder	soil	0.1	10.2
2018-03-09	20:00:00	54	R	in_cylinder	soil	0.1	9.1
2018-03-09	21:00:00	54	R	in_cylinder	soil	0.1	8.6
2018-03-09	22:00:00	54	R	in_cylinder	soil	0.1	8.1
2018-03-09	23:00:00	54	R	in_cylinder	soil	0.1	7.6
2018-03-10	00:00:00	54	R	in_cylinder	soil	0.1	7.1
2018-03-10	01:00:00	54	R	in_cylinder	soil	0.1	7.1
2018-03-10	02:00:00	54	R	in_cylinder	soil	0.1	7.1
2018-03-10	03:00:00	54	R	in_cylinder	soil	0.1	6.6
2018-03-10	04:00:00	54	R	in_cylinder	soil	0.1	6.6
2018-03-10	05:00:00	54	R	in_cylinder	soil	0.1	6.6
2018-03-10	06:00:00	54	R	in_cylinder	soil	0.1	6.6
2018-03-10	07:00:00	54	R	in_cylinder	soil	0.1	6.6
2018-03-10	08:00:00	54	R	in_cylinder	soil	0.1	6.6
2018-03-10	09:00:00	54	R	in_cylinder	soil	0.1	6.6
2018-03-10	10:00:00	54	R	in_cylinder	soil	0.1	7.1
2018-03-10	11:00:00	54	R	in_cylinder	soil	0.1	7.6
2018-03-10	12:00:00	54	R	in_cylinder	soil	0.1	7.6
2018-03-10	13:00:00	54	R	in_cylinder	soil	0.1	8.1
2018-03-10	14:00:00	54	R	in_cylinder	soil	0.1	8.6
2018-03-10	15:00:00	54	R	in_cylinder	soil	0.1	9.1
2018-03-10	16:00:00	54	R	in_cylinder	soil	0.1	10.2
2018-03-10	17:00:00	54	R	in_cylinder	soil	0.1	10.7
2018-03-10	18:00:00	54	R	in_cylinder	soil	0.1	10.2
2018-03-10	19:00:00	54	R	in_cylinder	soil	0.1	9.7
2018-03-10	20:00:00	54	R	in_cylinder	soil	0.1	9.1
2018-03-10	21:00:00	54	R	in_cylinder	soil	0.1	8.6
2018-03-10	22:00:00	54	R	in_cylinder	soil	0.1	8.6
2018-03-10	23:00:00	54	R	in_cylinder	soil	0.1	8.6
2018-03-11	00:00:00	54	R	in_cylinder	soil	0.1	8.1
2018-03-11	01:00:00	54	R	in_cylinder	soil	0.1	7.6
2018-03-11	02:00:00	54	R	in_cylinder	soil	0.1	7.6
2018-03-11	03:00:00	54	R	in_cylinder	soil	0.1	7.1
2018-03-11	04:00:00	54	R	in_cylinder	soil	0.1	7.1
2018-03-11	05:00:00	54	R	in_cylinder	soil	0.1	6.6
2018-03-11	06:00:00	54	R	in_cylinder	soil	0.1	6.6
2018-03-11	07:00:00	54	R	in_cylinder	soil	0.1	6.6
2018-03-11	08:00:00	54	R	in_cylinder	soil	0.1	6.6
2018-03-11	09:00:00	54	R	in_cylinder	soil	0.1	6.6
2018-03-11	10:00:00	54	R	in_cylinder	soil	0.1	7.1
2018-03-11	11:00:00	54	R	in_cylinder	soil	0.1	8.6
2018-03-11	12:00:00	54	R	in_cylinder	soil	0.1	9.1
2018-03-11	13:00:00	54	R	in_cylinder	soil	0.1	9.7
2018-03-11	14:00:00	54	R	in_cylinder	soil	0.1	9.7
2018-03-11	15:00:00	54	R	in_cylinder	soil	0.1	9.7
2018-03-11	16:00:00	54	R	in_cylinder	soil	0.1	9.7
2018-03-11	17:00:00	54	R	in_cylinder	soil	0.1	9.1
2018-03-11	18:00:00	54	R	in_cylinder	soil	0.1	9.1
2018-03-11	19:00:00	54	R	in_cylinder	soil	0.1	9.1
2018-03-11	20:00:00	54	R	in_cylinder	soil	0.1	8.6
2018-03-11	21:00:00	54	R	in_cylinder	soil	0.1	8.1
2018-03-11	22:00:00	54	R	in_cylinder	soil	0.1	8.1
2018-03-11	23:00:00	54	R	in_cylinder	soil	0.1	7.6
2018-03-12	00:00:00	54	R	in_cylinder	soil	0.1	7.1
2018-03-12	01:00:00	54	R	in_cylinder	soil	0.1	7.1
2018-03-12	02:00:00	54	R	in_cylinder	soil	0.1	6.6
2018-03-12	03:00:00	54	R	in_cylinder	soil	0.1	6.1
2018-03-12	04:00:00	54	R	in_cylinder	soil	0.1	6.1
2018-03-12	05:00:00	54	R	in_cylinder	soil	0.1	5.6
2018-03-12	06:00:00	54	R	in_cylinder	soil	0.1	5.6
2018-03-12	07:00:00	54	R	in_cylinder	soil	0.1	5.6
2018-03-12	08:00:00	54	R	in_cylinder	soil	0.1	6.1
2018-03-12	09:00:00	54	R	in_cylinder	soil	0.1	6.1
2018-03-12	10:00:00	54	R	in_cylinder	soil	0.1	7.1
2018-03-12	11:00:00	54	R	in_cylinder	soil	0.1	8.6
2018-03-12	12:00:00	54	R	in_cylinder	soil	0.1	9.1
2018-03-12	13:00:00	54	R	in_cylinder	soil	0.1	10.2
2018-03-12	14:00:00	54	R	in_cylinder	soil	0.1	10.7
2018-03-12	15:00:00	54	R	in_cylinder	soil	0.1	10.7
2018-03-12	16:00:00	54	R	in_cylinder	soil	0.1	11.2
2018-03-12	17:00:00	54	R	in_cylinder	soil	0.1	10.7
2018-03-12	18:00:00	54	R	in_cylinder	soil	0.1	10.2
2018-03-12	19:00:00	54	R	in_cylinder	soil	0.1	9.7
2018-03-12	20:00:00	54	R	in_cylinder	soil	0.1	9.1
2018-03-12	21:00:00	54	R	in_cylinder	soil	0.1	8.6
2018-03-12	22:00:00	54	R	in_cylinder	soil	0.1	8.1
2018-03-12	23:00:00	54	R	in_cylinder	soil	0.1	8.1
2018-03-13	00:00:00	54	R	in_cylinder	soil	0.1	8.1
2018-03-13	01:00:00	54	R	in_cylinder	soil	0.1	7.6
2018-03-13	02:00:00	54	R	in_cylinder	soil	0.1	7.6
2018-03-13	03:00:00	54	R	in_cylinder	soil	0.1	7.1
2018-03-13	04:00:00	54	R	in_cylinder	soil	0.1	6.6
2018-03-13	05:00:00	54	R	in_cylinder	soil	0.1	6.6
2018-03-13	06:00:00	54	R	in_cylinder	soil	0.1	6.6
2018-03-13	07:00:00	54	R	in_cylinder	soil	0.1	6.6
2018-03-13	08:00:00	54	R	in_cylinder	soil	0.1	6.6
2018-03-13	09:00:00	54	R	in_cylinder	soil	0.1	6.6
2018-03-13	10:00:00	54	R	in_cylinder	soil	0.1	7.1
2018-03-13	11:00:00	54	R	in_cylinder	soil	0.1	7.6
2018-03-13	12:00:00	54	R	in_cylinder	soil	0.1	8.6
2018-03-13	13:00:00	54	R	in_cylinder	soil	0.1	8.6
2018-03-13	14:00:00	54	R	in_cylinder	soil	0.1	8.6
2018-03-13	15:00:00	54	R	in_cylinder	soil	0.1	9.1
2018-03-13	16:00:00	54	R	in_cylinder	soil	0.1	8.6
2018-03-13	17:00:00	54	R	in_cylinder	soil	0.1	8.1
2018-03-13	18:00:00	54	R	in_cylinder	soil	0.1	8.1
2018-03-13	19:00:00	54	R	in_cylinder	soil	0.1	7.6
2018-03-13	20:00:00	54	R	in_cylinder	soil	0.1	7.6
2018-03-13	21:00:00	54	R	in_cylinder	soil	0.1	7.6
2018-03-13	22:00:00	54	R	in_cylinder	soil	0.1	7.1
2018-03-13	23:00:00	54	R	in_cylinder	soil	0.1	7.1
2018-03-14	00:00:00	54	R	in_cylinder	soil	0.1	7.1
2018-03-14	01:00:00	54	R	in_cylinder	soil	0.1	6.6
2018-03-14	02:00:00	54	R	in_cylinder	soil	0.1	6.6
2018-03-14	03:00:00	54	R	in_cylinder	soil	0.1	6.6
2018-03-14	04:00:00	54	R	in_cylinder	soil	0.1	6.6
2018-03-14	05:00:00	54	R	in_cylinder	soil	0.1	6.6
2018-03-14	06:00:00	54	R	in_cylinder	soil	0.1	6.6
2018-03-14	07:00:00	54	R	in_cylinder	soil	0.1	6.1
2018-03-14	08:00:00	54	R	in_cylinder	soil	0.1	6.6
2018-03-14	09:00:00	54	R	in_cylinder	soil	0.1	7.1
2018-03-14	10:00:00	54	R	in_cylinder	soil	0.1	8.6
2018-03-14	11:00:00	54	R	in_cylinder	soil	0.1	10.2
2018-03-14	12:00:00	54	R	in_cylinder	soil	0.1	11.2
2018-03-14	13:00:00	54	R	in_cylinder	soil	0.1	13.2
2018-03-14	14:00:00	54	R	in_cylinder	soil	0.1	14.7
2018-03-14	15:00:00	54	R	in_cylinder	soil	0.1	15.2
2018-03-14	16:00:00	54	R	in_cylinder	soil	0.1	14.7
2018-03-14	17:00:00	54	R	in_cylinder	soil	0.1	13.7
2018-03-14	18:00:00	54	R	in_cylinder	soil	0.1	12.7
2018-03-14	19:00:00	54	R	in_cylinder	soil	0.1	11.7
2018-03-14	20:00:00	54	R	in_cylinder	soil	0.1	10.7
2018-03-14	21:00:00	54	R	in_cylinder	soil	0.1	9.7
2018-03-14	22:00:00	54	R	in_cylinder	soil	0.1	8.6
2018-03-14	23:00:00	54	R	in_cylinder	soil	0.1	8.1
2018-03-15	00:00:00	54	R	in_cylinder	soil	0.1	7.6
2018-03-15	01:00:00	54	R	in_cylinder	soil	0.1	7.1
2018-03-15	02:00:00	54	R	in_cylinder	soil	0.1	6.6
2018-03-15	03:00:00	54	R	in_cylinder	soil	0.1	6.6
2018-03-15	04:00:00	54	R	in_cylinder	soil	0.1	6.1
2018-03-15	05:00:00	54	R	in_cylinder	soil	0.1	6.1
2018-03-15	06:00:00	54	R	in_cylinder	soil	0.1	5.6
2018-03-15	07:00:00	54	R	in_cylinder	soil	0.1	5.6
2018-03-15	08:00:00	54	R	in_cylinder	soil	0.1	6.1
2018-03-15	09:00:00	54	R	in_cylinder	soil	0.1	6.1
2018-03-15	10:00:00	54	R	in_cylinder	soil	0.1	6.6
2018-03-15	11:00:00	54	R	in_cylinder	soil	0.1	7.1
2018-03-15	12:00:00	54	R	in_cylinder	soil	0.1	7.1
2018-03-15	13:00:00	54	R	in_cylinder	soil	0.1	7.6
2018-03-15	14:00:00	54	R	in_cylinder	soil	0.1	8.1
2018-03-15	15:00:00	54	R	in_cylinder	soil	0.1	8.6
2018-03-15	16:00:00	54	R	in_cylinder	soil	0.1	9.1
2018-03-15	17:00:00	54	R	in_cylinder	soil	0.1	9.1
2018-03-15	18:00:00	54	R	in_cylinder	soil	0.1	9.1
2018-03-15	19:00:00	54	R	in_cylinder	soil	0.1	8.6
2018-03-15	20:00:00	54	R	in_cylinder	soil	0.1	8.6
2018-03-15	21:00:00	54	R	in_cylinder	soil	0.1	8.1
2018-03-15	22:00:00	54	R	in_cylinder	soil	0.1	8.1
2018-03-15	23:00:00	54	R	in_cylinder	soil	0.1	7.6
2018-03-16	00:00:00	54	R	in_cylinder	soil	0.1	7.1
2018-03-16	01:00:00	54	R	in_cylinder	soil	0.1	6.6
2018-03-16	02:00:00	54	R	in_cylinder	soil	0.1	6.1
2018-03-16	03:00:00	54	R	in_cylinder	soil	0.1	6.1
2018-03-16	04:00:00	54	R	in_cylinder	soil	0.1	5.6
2018-03-16	05:00:00	54	R	in_cylinder	soil	0.1	5.6
2018-03-16	06:00:00	54	R	in_cylinder	soil	0.1	5.6
2018-03-16	07:00:00	54	R	in_cylinder	soil	0.1	5.6
2018-03-16	08:00:00	54	R	in_cylinder	soil	0.1	5.6
2018-03-16	09:00:00	54	R	in_cylinder	soil	0.1	6.1
2018-03-16	10:00:00	54	R	in_cylinder	soil	0.1	7.1
2018-03-16	11:00:00	54	R	in_cylinder	soil	0.1	8.1
2018-03-16	12:00:00	54	R	in_cylinder	soil	0.1	9.1
2018-03-16	13:00:00	54	R	in_cylinder	soil	0.1	10.7
2018-03-16	14:00:00	54	R	in_cylinder	soil	0.1	11.7
2018-03-16	15:00:00	54	R	in_cylinder	soil	0.1	12.7
2018-03-16	16:00:00	54	R	in_cylinder	soil	0.1	11.7
2018-03-16	17:00:00	54	R	in_cylinder	soil	0.1	11.2
2018-03-16	18:00:00	54	R	in_cylinder	soil	0.1	11.2
2018-03-16	19:00:00	54	R	in_cylinder	soil	0.1	10.7
2018-03-16	20:00:00	54	R	in_cylinder	soil	0.1	10.2
2018-03-16	21:00:00	54	R	in_cylinder	soil	0.1	9.1
2018-03-16	22:00:00	54	R	in_cylinder	soil	0.1	8.6
2018-03-16	23:00:00	54	R	in_cylinder	soil	0.1	8.1
2018-03-17	00:00:00	54	R	in_cylinder	soil	0.1	7.6
2018-03-17	01:00:00	54	R	in_cylinder	soil	0.1	7.1
2018-03-17	02:00:00	54	R	in_cylinder	soil	0.1	6.6
2018-03-17	03:00:00	54	R	in_cylinder	soil	0.1	6.6
2018-03-17	04:00:00	54	R	in_cylinder	soil	0.1	6.1
2018-03-17	05:00:00	54	R	in_cylinder	soil	0.1	6.1
2018-03-17	06:00:00	54	R	in_cylinder	soil	0.1	5.6
2018-03-17	07:00:00	54	R	in_cylinder	soil	0.1	5.6
2018-03-17	08:00:00	54	R	in_cylinder	soil	0.1	5.6
2018-03-17	09:00:00	54	R	in_cylinder	soil	0.1	6.1
2018-03-17	10:00:00	54	R	in_cylinder	soil	0.1	6.1
2018-03-17	11:00:00	54	R	in_cylinder	soil	0.1	6.6
2018-03-17	12:00:00	54	R	in_cylinder	soil	0.1	6.6
2018-03-17	13:00:00	54	R	in_cylinder	soil	0.1	6.6
2018-03-17	14:00:00	54	R	in_cylinder	soil	0.1	6.6
2018-03-17	15:00:00	54	R	in_cylinder	soil	0.1	6.6
2018-03-17	16:00:00	54	R	in_cylinder	soil	0.1	6.6
2018-03-17	17:00:00	54	R	in_cylinder	soil	0.1	6.1
2018-03-17	18:00:00	54	R	in_cylinder	soil	0.1	5.6
2018-03-17	19:00:00	54	R	in_cylinder	soil	0.1	5.1
2018-03-17	20:00:00	54	R	in_cylinder	soil	0.1	4.6
2018-03-17	21:00:00	54	R	in_cylinder	soil	0.1	4.1
2018-03-17	22:00:00	54	R	in_cylinder	soil	0.1	4.1
2018-03-17	23:00:00	54	R	in_cylinder	soil	0.1	4.1
2018-03-18	00:00:00	54	R	in_cylinder	soil	0.1	3.6
2018-03-18	01:00:00	54	R	in_cylinder	soil	0.1	3.6
2018-03-18	02:00:00	54	R	in_cylinder	soil	0.1	3.6
2018-03-18	03:00:00	54	R	in_cylinder	soil	0.1	3.6
2018-03-18	04:00:00	54	R	in_cylinder	soil	0.1	3.1
2018-03-18	05:00:00	54	R	in_cylinder	soil	0.1	3.1
2018-03-18	06:00:00	54	R	in_cylinder	soil	0.1	3.1
2018-03-18	07:00:00	54	R	in_cylinder	soil	0.1	3.1
2018-03-18	08:00:00	54	R	in_cylinder	soil	0.1	3.1
2018-03-18	09:00:00	54	R	in_cylinder	soil	0.1	3.1
2018-03-18	10:00:00	54	R	in_cylinder	soil	0.1	3.1
2018-03-18	11:00:00	54	R	in_cylinder	soil	0.1	3.1
2018-03-18	12:00:00	54	R	in_cylinder	soil	0.1	3.1
2018-03-18	13:00:00	54	R	in_cylinder	soil	0.1	3.6
2018-03-18	14:00:00	54	R	in_cylinder	soil	0.1	3.6
2018-03-18	15:00:00	54	R	in_cylinder	soil	0.1	3.6
2018-03-18	16:00:00	54	R	in_cylinder	soil	0.1	3.6
2018-03-18	17:00:00	54	R	in_cylinder	soil	0.1	3.6
2018-03-18	18:00:00	54	R	in_cylinder	soil	0.1	3.6
2018-03-18	19:00:00	54	R	in_cylinder	soil	0.1	3.1
2018-03-18	20:00:00	54	R	in_cylinder	soil	0.1	3.1
2018-03-18	21:00:00	54	R	in_cylinder	soil	0.1	3.1
2018-03-18	22:00:00	54	R	in_cylinder	soil	0.1	3.1
2018-03-18	23:00:00	54	R	in_cylinder	soil	0.1	3.1
2018-03-19	00:00:00	54	R	in_cylinder	soil	0.1	2.6
2018-03-19	01:00:00	54	R	in_cylinder	soil	0.1	2.6
2018-03-19	02:00:00	54	R	in_cylinder	soil	0.1	2.6
2018-03-19	03:00:00	54	R	in_cylinder	soil	0.1	2.6
2018-03-19	04:00:00	54	R	in_cylinder	soil	0.1	2.6
2018-03-19	05:00:00	54	R	in_cylinder	soil	0.1	2.6
2018-03-19	06:00:00	54	R	in_cylinder	soil	0.1	2.6
2018-03-19	07:00:00	54	R	in_cylinder	soil	0.1	2.6
2018-03-19	08:00:00	54	R	in_cylinder	soil	0.1	2.6
2018-03-19	09:00:00	54	R	in_cylinder	soil	0.1	2.6
2018-03-19	10:00:00	54	R	in_cylinder	soil	0.1	3.1
2018-03-19	11:00:00	54	R	in_cylinder	soil	0.1	3.1
2018-03-19	12:00:00	54	R	in_cylinder	soil	0.1	3.6
2018-03-19	13:00:00	54	R	in_cylinder	soil	0.1	3.6
2018-03-19	14:00:00	54	R	in_cylinder	soil	0.1	4.1
2018-03-19	15:00:00	54	R	in_cylinder	soil	0.1	4.6
2018-03-19	16:00:00	54	R	in_cylinder	soil	0.1	4.6
2018-03-19	17:00:00	54	R	in_cylinder	soil	0.1	4.1
2018-03-19	18:00:00	54	R	in_cylinder	soil	0.1	4.1
2018-03-19	19:00:00	54	R	in_cylinder	soil	0.1	4.1
2018-03-19	20:00:00	54	R	in_cylinder	soil	0.1	3.6
2018-03-19	21:00:00	54	R	in_cylinder	soil	0.1	3.6
2018-03-19	22:00:00	54	R	in_cylinder	soil	0.1	3.6
2018-03-19	23:00:00	54	R	in_cylinder	soil	0.1	3.1
2018-03-20	00:00:00	54	R	in_cylinder	soil	0.1	3.1
2018-03-20	01:00:00	54	R	in_cylinder	soil	0.1	3.1
2018-03-20	02:00:00	54	R	in_cylinder	soil	0.1	3.1
2018-03-20	03:00:00	54	R	in_cylinder	soil	0.1	2.6
2018-03-20	04:00:00	54	R	in_cylinder	soil	0.1	2.6
2018-03-20	05:00:00	54	R	in_cylinder	soil	0.1	2.6
2018-03-20	06:00:00	54	R	in_cylinder	soil	0.1	2.6
2018-03-20	07:00:00	54	R	in_cylinder	soil	0.1	2.6
2018-03-20	08:00:00	54	R	in_cylinder	soil	0.1	2.6
2018-03-20	09:00:00	54	R	in_cylinder	soil	0.1	2.6
2018-03-20	10:00:00	54	R	in_cylinder	soil	0.1	3.1
2018-03-20	11:00:00	54	R	in_cylinder	soil	0.1	3.1
2018-03-20	12:00:00	54	R	in_cylinder	soil	0.1	3.1
2018-03-20	13:00:00	54	R	in_cylinder	soil	0.1	3.6
2018-03-20	14:00:00	54	R	in_cylinder	soil	0.1	6.1
2018-03-20	15:00:00	54	R	in_cylinder	soil	0.1	7.1
2018-03-20	16:00:00	54	R	in_cylinder	soil	0.1	6.6
2018-03-20	17:00:00	54	R	in_cylinder	soil	0.1	5.6
2018-03-20	18:00:00	54	R	in_cylinder	soil	0.1	5.1
2018-03-20	19:00:00	54	R	in_cylinder	soil	0.1	4.6
2018-03-20	20:00:00	54	R	in_cylinder	soil	0.1	4.1
2018-03-20	21:00:00	54	R	in_cylinder	soil	0.1	3.6
2018-03-20	22:00:00	54	R	in_cylinder	soil	0.1	3.6
2018-03-20	23:00:00	54	R	in_cylinder	soil	0.1	3.1
2018-03-21	00:00:00	54	R	in_cylinder	soil	0.1	3.1
2018-03-21	01:00:00	54	R	in_cylinder	soil	0.1	3.1
2018-03-21	02:00:00	54	R	in_cylinder	soil	0.1	3.1
2018-03-21	03:00:00	54	R	in_cylinder	soil	0.1	3.1
2018-03-21	04:00:00	54	R	in_cylinder	soil	0.1	3.1
2018-03-21	05:00:00	54	R	in_cylinder	soil	0.1	2.6
2018-03-21	06:00:00	54	R	in_cylinder	soil	0.1	2.6
2018-03-21	07:00:00	54	R	in_cylinder	soil	0.1	2.6
2018-03-21	08:00:00	54	R	in_cylinder	soil	0.1	2.6
2018-03-21	09:00:00	54	R	in_cylinder	soil	0.1	2.6
2018-03-21	10:00:00	54	R	in_cylinder	soil	0.1	3.6
2018-03-21	11:00:00	54	R	in_cylinder	soil	0.1	5.1
2018-03-21	12:00:00	54	R	in_cylinder	soil	0.1	6.1
2018-03-21	13:00:00	54	R	in_cylinder	soil	0.1	7.1
2018-03-21	14:00:00	54	R	in_cylinder	soil	0.1	8.1
2018-03-21	15:00:00	54	R	in_cylinder	soil	0.1	8.6
2018-03-21	16:00:00	54	R	in_cylinder	soil	0.1	8.6
2018-03-21	17:00:00	54	R	in_cylinder	soil	0.1	7.6
2018-03-21	18:00:00	54	R	in_cylinder	soil	0.1	6.6
2018-03-21	19:00:00	54	R	in_cylinder	soil	0.1	6.1
2018-03-21	20:00:00	54	R	in_cylinder	soil	0.1	5.1
2018-03-21	21:00:00	54	R	in_cylinder	soil	0.1	4.6
2018-03-21	22:00:00	54	R	in_cylinder	soil	0.1	3.6
2018-03-21	23:00:00	54	R	in_cylinder	soil	0.1	3.1
2018-03-22	00:00:00	54	R	in_cylinder	soil	0.1	3.1
2018-03-22	01:00:00	54	R	in_cylinder	soil	0.1	2.6
2018-03-22	02:00:00	54	R	in_cylinder	soil	0.1	2.6
2018-03-22	03:00:00	54	R	in_cylinder	soil	0.1	2.1
2018-03-22	04:00:00	54	R	in_cylinder	soil	0.1	2.1
2018-03-22	05:00:00	54	R	in_cylinder	soil	0.1	2.1
2018-03-22	06:00:00	54	R	in_cylinder	soil	0.1	2.1
2018-03-22	07:00:00	54	R	in_cylinder	soil	0.1	1.6
2018-03-22	08:00:00	54	R	in_cylinder	soil	0.1	1.6
2018-03-22	09:00:00	54	R	in_cylinder	soil	0.1	1.6
2018-03-22	10:00:00	54	R	in_cylinder	soil	0.1	2.1
2018-03-22	11:00:00	54	R	in_cylinder	soil	0.1	4.1
2018-03-22	12:00:00	54	R	in_cylinder	soil	0.1	5.6
2018-03-22	13:00:00	54	R	in_cylinder	soil	0.1	7.1
2018-03-22	14:00:00	54	R	in_cylinder	soil	0.1	8.1
2018-03-22	15:00:00	54	R	in_cylinder	soil	0.1	8.1
2018-03-22	16:00:00	54	R	in_cylinder	soil	0.1	7.6
2018-03-22	17:00:00	54	R	in_cylinder	soil	0.1	6.6
2018-03-22	18:00:00	54	R	in_cylinder	soil	0.1	6.6
2018-03-22	19:00:00	54	R	in_cylinder	soil	0.1	6.1
2018-03-22	20:00:00	54	R	in_cylinder	soil	0.1	5.6
2018-03-22	21:00:00	54	R	in_cylinder	soil	0.1	5.1
2018-03-22	22:00:00	54	R	in_cylinder	soil	0.1	5.1
2018-03-22	23:00:00	54	R	in_cylinder	soil	0.1	4.6
2018-03-23	00:00:00	54	R	in_cylinder	soil	0.1	4.6
2018-03-23	01:00:00	54	R	in_cylinder	soil	0.1	4.6
2018-03-23	02:00:00	54	R	in_cylinder	soil	0.1	4.6
2018-03-23	03:00:00	54	R	in_cylinder	soil	0.1	4.6
2018-03-23	04:00:00	54	R	in_cylinder	soil	0.1	4.6
2018-03-23	05:00:00	54	R	in_cylinder	soil	0.1	4.6
2018-03-23	06:00:00	54	R	in_cylinder	soil	0.1	4.6
2018-03-23	07:00:00	54	R	in_cylinder	soil	0.1	4.1
2018-03-23	08:00:00	54	R	in_cylinder	soil	0.1	4.6
2018-03-23	09:00:00	54	R	in_cylinder	soil	0.1	5.1
2018-03-23	10:00:00	54	R	in_cylinder	soil	0.1	6.1
2018-03-23	11:00:00	54	R	in_cylinder	soil	0.1	6.6
2018-03-23	12:00:00	54	R	in_cylinder	soil	0.1	7.6
2018-03-23	13:00:00	54	R	in_cylinder	soil	0.1	8.1
2018-03-23	14:00:00	54	R	in_cylinder	soil	0.1	9.1
2018-03-23	15:00:00	54	R	in_cylinder	soil	0.1	10.7
2018-03-23	16:00:00	54	R	in_cylinder	soil	0.1	10.7
2018-03-23	17:00:00	54	R	in_cylinder	soil	0.1	10.7
2018-03-23	18:00:00	54	R	in_cylinder	soil	0.1	9.7
2018-03-23	19:00:00	54	R	in_cylinder	soil	0.1	9.1
2018-03-23	20:00:00	54	R	in_cylinder	soil	0.1	8.1
2018-03-23	21:00:00	54	R	in_cylinder	soil	0.1	7.1
2018-03-23	22:00:00	54	R	in_cylinder	soil	0.1	6.6
2018-03-23	23:00:00	54	R	in_cylinder	soil	0.1	6.1
2018-03-24	00:00:00	54	R	in_cylinder	soil	0.1	5.6
2018-03-24	01:00:00	54	R	in_cylinder	soil	0.1	5.1
2018-03-24	02:00:00	54	R	in_cylinder	soil	0.1	4.6
2018-03-24	03:00:00	54	R	in_cylinder	soil	0.1	4.1
2018-03-24	04:00:00	54	R	in_cylinder	soil	0.1	3.6
2018-03-24	05:00:00	54	R	in_cylinder	soil	0.1	3.6
2018-03-24	06:00:00	54	R	in_cylinder	soil	0.1	3.1
2018-03-24	07:00:00	54	R	in_cylinder	soil	0.1	3.1
2018-03-24	08:00:00	54	R	in_cylinder	soil	0.1	3.1
2018-03-24	09:00:00	54	R	in_cylinder	soil	0.1	3.6
2018-03-24	10:00:00	54	R	in_cylinder	soil	0.1	5.1
2018-03-24	11:00:00	54	R	in_cylinder	soil	0.1	7.6
2018-03-24	12:00:00	54	R	in_cylinder	soil	0.1	9.7
2018-03-24	13:00:00	54	R	in_cylinder	soil	0.1	12.2
2018-03-24	14:00:00	54	R	in_cylinder	soil	0.1	13.7
2018-03-24	15:00:00	54	R	in_cylinder	soil	0.1	14.2
2018-03-24	16:00:00	54	R	in_cylinder	soil	0.1	13.7
2018-03-24	17:00:00	54	R	in_cylinder	soil	0.1	13.2
2018-03-24	18:00:00	54	R	in_cylinder	soil	0.1	12.2
2018-03-24	19:00:00	54	R	in_cylinder	soil	0.1	11.2
2018-03-24	20:00:00	54	R	in_cylinder	soil	0.1	9.7
2018-03-24	21:00:00	54	R	in_cylinder	soil	0.1	8.6
2018-03-24	22:00:00	54	R	in_cylinder	soil	0.1	8.1
2018-03-24	23:00:00	54	R	in_cylinder	soil	0.1	7.1
2018-03-25	00:00:00	54	R	in_cylinder	soil	0.1	6.6
2018-03-25	01:00:00	54	R	in_cylinder	soil	0.1	6.1
2018-03-25	02:00:00	54	R	in_cylinder	soil	0.1	5.6
2018-03-25	03:00:00	54	R	in_cylinder	soil	0.1	5.6
2018-03-25	04:00:00	54	R	in_cylinder	soil	0.1	5.1
2018-03-25	05:00:00	54	R	in_cylinder	soil	0.1	4.6
2018-03-25	06:00:00	54	R	in_cylinder	soil	0.1	4.6
2018-03-25	07:00:00	54	R	in_cylinder	soil	0.1	4.1
2018-03-25	08:00:00	54	R	in_cylinder	soil	0.1	4.1
2018-03-25	09:00:00	54	R	in_cylinder	soil	0.1	5.1
2018-03-25	10:00:00	54	R	in_cylinder	soil	0.1	6.6
2018-03-25	11:00:00	54	R	in_cylinder	soil	0.1	9.1
2018-03-25	12:00:00	54	R	in_cylinder	soil	0.1	11.2
2018-03-25	13:00:00	54	R	in_cylinder	soil	0.1	13.7
2018-03-25	14:00:00	54	R	in_cylinder	soil	0.1	14.7
2018-03-25	15:00:00	54	R	in_cylinder	soil	0.1	14.7
2018-03-25	16:00:00	54	R	in_cylinder	soil	0.1	14.2
2018-03-25	17:00:00	54	R	in_cylinder	soil	0.1	13.7
2018-03-25	18:00:00	54	R	in_cylinder	soil	0.1	12.7
2018-03-25	19:00:00	54	R	in_cylinder	soil	0.1	11.7
2018-03-25	20:00:00	54	R	in_cylinder	soil	0.1	11.2
2018-03-25	21:00:00	54	R	in_cylinder	soil	0.1	10.2
2018-03-25	22:00:00	54	R	in_cylinder	soil	0.1	9.7
2018-03-25	23:00:00	54	R	in_cylinder	soil	0.1	9.1
2018-03-26	00:00:00	54	R	in_cylinder	soil	0.1	8.6
2018-03-26	01:00:00	54	R	in_cylinder	soil	0.1	8.1
2018-03-26	02:00:00	54	R	in_cylinder	soil	0.1	7.6
2018-03-26	03:00:00	54	R	in_cylinder	soil	0.1	7.1
2018-03-26	04:00:00	54	R	in_cylinder	soil	0.1	6.6
2018-03-26	05:00:00	54	R	in_cylinder	soil	0.1	6.6
2018-03-26	06:00:00	54	R	in_cylinder	soil	0.1	6.1
2018-03-26	07:00:00	54	R	in_cylinder	soil	0.1	6.1
2018-03-26	08:00:00	54	R	in_cylinder	soil	0.1	6.1
2018-03-26	09:00:00	54	R	in_cylinder	soil	0.1	6.6
2018-03-26	10:00:00	54	R	in_cylinder	soil	0.1	8.1
2018-03-26	11:00:00	54	R	in_cylinder	soil	0.1	10.2
2018-03-26	12:00:00	54	R	in_cylinder	soil	0.1	10.7
2018-03-26	13:00:00	54	R	in_cylinder	soil	0.1	10.7
2018-03-26	14:00:00	54	R	in_cylinder	soil	0.1	10.7
2018-03-26	15:00:00	54	R	in_cylinder	soil	0.1	10.7
2018-03-26	16:00:00	54	R	in_cylinder	soil	0.1	10.7
2018-03-26	17:00:00	54	R	in_cylinder	soil	0.1	10.7
2018-03-26	18:00:00	54	R	in_cylinder	soil	0.1	10.2
2018-03-26	19:00:00	54	R	in_cylinder	soil	0.1	10.2
2018-03-26	20:00:00	54	R	in_cylinder	soil	0.1	9.7
2018-03-26	21:00:00	54	R	in_cylinder	soil	0.1	9.1
2018-03-26	22:00:00	54	R	in_cylinder	soil	0.1	8.6
2018-03-26	23:00:00	54	R	in_cylinder	soil	0.1	8.6
2018-03-27	00:00:00	54	R	in_cylinder	soil	0.1	8.6
2018-03-27	01:00:00	54	R	in_cylinder	soil	0.1	8.1
2018-03-27	02:00:00	54	R	in_cylinder	soil	0.1	8.1
2018-03-27	03:00:00	54	R	in_cylinder	soil	0.1	8.1
2018-03-27	04:00:00	54	R	in_cylinder	soil	0.1	7.6
2018-03-27	05:00:00	54	R	in_cylinder	soil	0.1	7.6
2018-03-27	06:00:00	54	R	in_cylinder	soil	0.1	7.1
2018-03-27	07:00:00	54	R	in_cylinder	soil	0.1	6.6
2018-03-27	08:00:00	54	R	in_cylinder	soil	0.1	6.6
2018-03-27	09:00:00	54	R	in_cylinder	soil	0.1	7.1
2018-03-27	10:00:00	54	R	in_cylinder	soil	0.1	8.6
2018-03-27	11:00:00	54	R	in_cylinder	soil	0.1	10.7
2018-03-27	12:00:00	54	R	in_cylinder	soil	0.1	11.7
2018-03-27	13:00:00	54	R	in_cylinder	soil	0.1	12.7
2018-03-27	14:00:00	54	R	in_cylinder	soil	0.1	12.2
2018-03-27	15:00:00	54	R	in_cylinder	soil	0.1	11.7
2018-03-27	16:00:00	54	R	in_cylinder	soil	0.1	11.2
2018-03-27	17:00:00	54	R	in_cylinder	soil	0.1	11.2
2018-03-27	18:00:00	54	R	in_cylinder	soil	0.1	10.2
2018-03-27	19:00:00	54	R	in_cylinder	soil	0.1	9.7
2018-03-27	20:00:00	54	R	in_cylinder	soil	0.1	9.7
2018-03-27	21:00:00	54	R	in_cylinder	soil	0.1	9.1
2018-03-27	22:00:00	54	R	in_cylinder	soil	0.1	9.1
2018-03-27	23:00:00	54	R	in_cylinder	soil	0.1	8.6
2018-03-28	00:00:00	54	R	in_cylinder	soil	0.1	8.6
2018-03-28	01:00:00	54	R	in_cylinder	soil	0.1	8.6
2018-03-28	02:00:00	54	R	in_cylinder	soil	0.1	8.6
2018-03-28	03:00:00	54	R	in_cylinder	soil	0.1	8.6
2018-03-28	04:00:00	54	R	in_cylinder	soil	0.1	8.6
2018-03-28	05:00:00	54	R	in_cylinder	soil	0.1	8.1
2018-03-28	06:00:00	54	R	in_cylinder	soil	0.1	8.1
2018-03-28	07:00:00	54	R	in_cylinder	soil	0.1	8.1
2018-03-28	08:00:00	54	R	in_cylinder	soil	0.1	8.6
2018-03-28	09:00:00	54	R	in_cylinder	soil	0.1	8.6
2018-03-28	10:00:00	54	R	in_cylinder	soil	0.1	9.1
2018-03-28	11:00:00	54	R	in_cylinder	soil	0.1	10.2
2018-03-28	12:00:00	54	R	in_cylinder	soil	0.1	10.7
2018-03-28	13:00:00	54	R	in_cylinder	soil	0.1	11.2
2018-03-28	14:00:00	54	R	in_cylinder	soil	0.1	11.7
2018-03-28	15:00:00	54	R	in_cylinder	soil	0.1	12.2
2018-03-28	16:00:00	54	R	in_cylinder	soil	0.1	11.7
2018-03-28	17:00:00	54	R	in_cylinder	soil	0.1	11.7
2018-03-28	18:00:00	54	R	in_cylinder	soil	0.1	11.2
2018-03-28	19:00:00	54	R	in_cylinder	soil	0.1	10.7
2018-03-28	20:00:00	54	R	in_cylinder	soil	0.1	10.7
2018-03-28	21:00:00	54	R	in_cylinder	soil	0.1	10.2
2018-03-28	22:00:00	54	R	in_cylinder	soil	0.1	9.7
2018-03-28	23:00:00	54	R	in_cylinder	soil	0.1	9.7
2018-03-29	00:00:00	54	R	in_cylinder	soil	0.1	9.1
2018-03-29	01:00:00	54	R	in_cylinder	soil	0.1	9.1
2018-03-29	02:00:00	54	R	in_cylinder	soil	0.1	8.6
2018-03-29	03:00:00	54	R	in_cylinder	soil	0.1	8.6
2018-03-29	04:00:00	54	R	in_cylinder	soil	0.1	8.1
2018-03-29	05:00:00	54	R	in_cylinder	soil	0.1	8.1
2018-03-29	06:00:00	54	R	in_cylinder	soil	0.1	8.1
2018-03-29	07:00:00	54	R	in_cylinder	soil	0.1	8.1
2018-03-29	08:00:00	54	R	in_cylinder	soil	0.1	8.1
2018-03-29	09:00:00	54	R	in_cylinder	soil	0.1	8.6
2018-03-29	10:00:00	54	R	in_cylinder	soil	0.1	9.1
2018-03-29	11:00:00	54	R	in_cylinder	soil	0.1	9.7
2018-03-29	12:00:00	54	R	in_cylinder	soil	0.1	9.7
2018-03-29	13:00:00	54	R	in_cylinder	soil	0.1	10.2
2018-03-29	14:00:00	54	R	in_cylinder	soil	0.1	9.7
2018-03-29	15:00:00	54	R	in_cylinder	soil	0.1	10.2
2018-03-29	16:00:00	54	R	in_cylinder	soil	0.1	10.7
2018-03-29	17:00:00	54	R	in_cylinder	soil	0.1	10.7
2018-03-29	18:00:00	54	R	in_cylinder	soil	0.1	10.7
2018-03-29	19:00:00	54	R	in_cylinder	soil	0.1	10.2
2018-03-29	20:00:00	54	R	in_cylinder	soil	0.1	9.1
2018-03-29	21:00:00	54	R	in_cylinder	soil	0.1	8.6
2018-03-29	22:00:00	54	R	in_cylinder	soil	0.1	8.1
2018-03-29	23:00:00	54	R	in_cylinder	soil	0.1	7.6
2018-03-30	00:00:00	54	R	in_cylinder	soil	0.1	7.1
2018-03-30	01:00:00	54	R	in_cylinder	soil	0.1	6.6
2018-03-30	02:00:00	54	R	in_cylinder	soil	0.1	6.1
2018-03-30	03:00:00	54	R	in_cylinder	soil	0.1	6.1
2018-03-30	04:00:00	54	R	in_cylinder	soil	0.1	5.6
2018-03-30	05:00:00	54	R	in_cylinder	soil	0.1	5.6
2018-03-30	06:00:00	54	R	in_cylinder	soil	0.1	5.6
2018-03-30	07:00:00	54	R	in_cylinder	soil	0.1	5.6
2018-03-30	08:00:00	54	R	in_cylinder	soil	0.1	5.6
2018-03-30	09:00:00	54	R	in_cylinder	soil	0.1	6.6
2018-03-30	10:00:00	54	R	in_cylinder	soil	0.1	8.1
2018-03-30	11:00:00	54	R	in_cylinder	soil	0.1	8.6
2018-03-30	12:00:00	54	R	in_cylinder	soil	0.1	9.7
2018-03-30	13:00:00	54	R	in_cylinder	soil	0.1	11.7
2018-03-30	14:00:00	54	R	in_cylinder	soil	0.1	12.7
2018-03-30	15:00:00	54	R	in_cylinder	soil	0.1	12.2
2018-03-30	16:00:00	54	R	in_cylinder	soil	0.1	11.2
2018-03-30	17:00:00	54	R	in_cylinder	soil	0.1	10.7
2018-03-30	18:00:00	54	R	in_cylinder	soil	0.1	9.7
2018-03-30	19:00:00	54	R	in_cylinder	soil	0.1	9.1
2018-03-30	20:00:00	54	R	in_cylinder	soil	0.1	8.6
2018-03-30	21:00:00	54	R	in_cylinder	soil	0.1	8.6
2018-03-30	22:00:00	54	R	in_cylinder	soil	0.1	8.1
2018-03-30	23:00:00	54	R	in_cylinder	soil	0.1	8.1
2018-03-31	00:00:00	54	R	in_cylinder	soil	0.1	8.1
2018-03-31	01:00:00	54	R	in_cylinder	soil	0.1	7.6
2018-03-31	02:00:00	54	R	in_cylinder	soil	0.1	7.6
2018-03-31	03:00:00	54	R	in_cylinder	soil	0.1	7.6
2018-03-31	04:00:00	54	R	in_cylinder	soil	0.1	7.6
2018-03-31	05:00:00	54	R	in_cylinder	soil	0.1	7.6
2018-03-31	06:00:00	54	R	in_cylinder	soil	0.1	7.6
2018-03-31	07:00:00	54	R	in_cylinder	soil	0.1	7.1
2018-03-31	08:00:00	54	R	in_cylinder	soil	0.1	7.1
2018-03-31	09:00:00	54	R	in_cylinder	soil	0.1	7.6
2018-03-31	10:00:00	54	R	in_cylinder	soil	0.1	8.1
2018-03-31	11:00:00	54	R	in_cylinder	soil	0.1	9.1
2018-03-31	12:00:00	54	R	in_cylinder	soil	0.1	9.7
2018-03-31	13:00:00	54	R	in_cylinder	soil	0.1	10.2
2018-03-31	14:00:00	54	R	in_cylinder	soil	0.1	10.7
2018-03-31	15:00:00	54	R	in_cylinder	soil	0.1	11.2
2018-03-31	16:00:00	54	R	in_cylinder	soil	0.1	11.7
2018-03-31	17:00:00	54	R	in_cylinder	soil	0.1	11.2
2018-03-31	18:00:00	54	R	in_cylinder	soil	0.1	10.7
2018-03-31	19:00:00	54	R	in_cylinder	soil	0.1	10.2
2018-03-31	20:00:00	54	R	in_cylinder	soil	0.1	9.7
2018-03-31	21:00:00	54	R	in_cylinder	soil	0.1	9.1
2018-03-31	22:00:00	54	R	in_cylinder	soil	0.1	8.1
2018-03-31	23:00:00	54	R	in_cylinder	soil	0.1	8.1
2018-04-01	00:00:00	54	R	in_cylinder	soil	0.1	7.6
2018-04-01	01:00:00	54	R	in_cylinder	soil	0.1	7.6
2018-04-01	02:00:00	54	R	in_cylinder	soil	0.1	7.6
2018-04-01	03:00:00	54	R	in_cylinder	soil	0.1	7.6
2018-04-01	04:00:00	54	R	in_cylinder	soil	0.1	7.1
2018-04-01	05:00:00	54	R	in_cylinder	soil	0.1	7.1
2018-04-01	06:00:00	54	R	in_cylinder	soil	0.1	7.1
2018-04-01	07:00:00	54	R	in_cylinder	soil	0.1	7.1
2018-04-01	08:00:00	54	R	in_cylinder	soil	0.1	7.1
2018-04-01	09:00:00	54	R	in_cylinder	soil	0.1	7.6
2018-04-01	10:00:00	54	R	in_cylinder	soil	0.1	8.1
2018-04-01	11:00:00	54	R	in_cylinder	soil	0.1	8.6
2018-04-01	12:00:00	54	R	in_cylinder	soil	0.1	9.7
2018-04-01	13:00:00	54	R	in_cylinder	soil	0.1	9.7
2018-04-01	14:00:00	54	R	in_cylinder	soil	0.1	9.7
2018-04-01	15:00:00	54	R	in_cylinder	soil	0.1	9.7
2018-04-01	16:00:00	54	R	in_cylinder	soil	0.1	10.2
2018-04-01	17:00:00	54	R	in_cylinder	soil	0.1	10.2
2018-04-01	18:00:00	54	R	in_cylinder	soil	0.1	9.7
2018-04-01	19:00:00	54	R	in_cylinder	soil	0.1	9.1
2018-04-01	20:00:00	54	R	in_cylinder	soil	0.1	8.6
2018-04-01	21:00:00	54	R	in_cylinder	soil	0.1	8.1
2018-04-01	22:00:00	54	R	in_cylinder	soil	0.1	7.6
2018-04-01	23:00:00	54	R	in_cylinder	soil	0.1	7.1
2018-04-02	00:00:00	54	R	in_cylinder	soil	0.1	6.6
2018-04-02	01:00:00	54	R	in_cylinder	soil	0.1	6.1
2018-04-02	02:00:00	54	R	in_cylinder	soil	0.1	5.6
2018-04-02	03:00:00	54	R	in_cylinder	soil	0.1	5.1
2018-04-02	04:00:00	54	R	in_cylinder	soil	0.1	5.1
2018-04-02	05:00:00	54	R	in_cylinder	soil	0.1	4.6
2018-04-02	06:00:00	54	R	in_cylinder	soil	0.1	4.6
2018-04-02	07:00:00	54	R	in_cylinder	soil	0.1	4.6
2018-04-02	08:00:00	54	R	in_cylinder	soil	0.1	4.6
2018-04-02	09:00:00	54	R	in_cylinder	soil	0.1	5.6
2018-04-02	10:00:00	54	R	in_cylinder	soil	0.1	7.1
2018-04-02	11:00:00	54	R	in_cylinder	soil	0.1	8.6
2018-04-02	12:00:00	54	R	in_cylinder	soil	0.1	10.7
2018-04-02	13:00:00	54	R	in_cylinder	soil	0.1	12.2
2018-04-02	14:00:00	54	R	in_cylinder	soil	0.1	13.2
2018-04-02	15:00:00	54	R	in_cylinder	soil	0.1	12.7
2018-04-02	16:00:00	54	R	in_cylinder	soil	0.1	12.7
2018-04-02	17:00:00	54	R	in_cylinder	soil	0.1	12.2
2018-04-02	18:00:00	54	R	in_cylinder	soil	0.1	11.7
2018-04-02	19:00:00	54	R	in_cylinder	soil	0.1	11.2
2018-04-02	20:00:00	54	R	in_cylinder	soil	0.1	10.7
2018-04-02	21:00:00	54	R	in_cylinder	soil	0.1	10.2
2018-04-02	22:00:00	54	R	in_cylinder	soil	0.1	9.7
2018-04-02	23:00:00	54	R	in_cylinder	soil	0.1	9.1
2018-04-03	00:00:00	54	R	in_cylinder	soil	0.1	9.1
2018-04-03	01:00:00	54	R	in_cylinder	soil	0.1	9.1
2018-04-03	02:00:00	54	R	in_cylinder	soil	0.1	8.6
2018-04-03	03:00:00	54	R	in_cylinder	soil	0.1	8.6
2018-04-03	04:00:00	54	R	in_cylinder	soil	0.1	8.1
2018-04-03	05:00:00	54	R	in_cylinder	soil	0.1	8.1
2018-04-03	06:00:00	54	R	in_cylinder	soil	0.1	8.1
2018-04-03	07:00:00	54	R	in_cylinder	soil	0.1	7.6
2018-04-03	08:00:00	54	R	in_cylinder	soil	0.1	7.6
2018-04-03	09:00:00	54	R	in_cylinder	soil	0.1	8.6
2018-04-03	10:00:00	54	R	in_cylinder	soil	0.1	9.7
2018-04-03	11:00:00	54	R	in_cylinder	soil	0.1	11.7
2018-04-03	12:00:00	54	R	in_cylinder	soil	0.1	12.7
2018-04-03	13:00:00	54	R	in_cylinder	soil	0.1	13.7
2018-04-03	14:00:00	54	R	in_cylinder	soil	0.1	15.2
2018-04-03	15:00:00	54	R	in_cylinder	soil	0.1	14.7
2018-04-03	16:00:00	54	R	in_cylinder	soil	0.1	14.7
2018-04-03	17:00:00	54	R	in_cylinder	soil	0.1	13.7
2018-04-03	18:00:00	54	R	in_cylinder	soil	0.1	13.7
2018-04-03	19:00:00	54	R	in_cylinder	soil	0.1	13.2
2018-04-03	20:00:00	54	R	in_cylinder	soil	0.1	12.7
2018-04-03	21:00:00	54	R	in_cylinder	soil	0.1	12.2
2018-04-03	22:00:00	54	R	in_cylinder	soil	0.1	11.7
2018-04-03	23:00:00	54	R	in_cylinder	soil	0.1	11.7
2018-04-04	00:00:00	54	R	in_cylinder	soil	0.1	11.2
2018-04-04	01:00:00	54	R	in_cylinder	soil	0.1	10.7
2018-04-04	02:00:00	54	R	in_cylinder	soil	0.1	10.7
2018-04-04	03:00:00	54	R	in_cylinder	soil	0.1	10.2
2018-04-04	04:00:00	54	R	in_cylinder	soil	0.1	10.2
2018-04-04	05:00:00	54	R	in_cylinder	soil	0.1	9.7
2018-04-04	06:00:00	54	R	in_cylinder	soil	0.1	9.7
2018-04-04	07:00:00	54	R	in_cylinder	soil	0.1	9.1
2018-04-04	08:00:00	54	R	in_cylinder	soil	0.1	9.7
2018-04-04	09:00:00	54	R	in_cylinder	soil	0.1	10.2
2018-04-04	10:00:00	54	R	in_cylinder	soil	0.1	11.7
2018-04-04	11:00:00	54	R	in_cylinder	soil	0.1	13.2
2018-04-04	12:00:00	54	R	in_cylinder	soil	0.1	14.7
2018-04-04	13:00:00	54	R	in_cylinder	soil	0.1	14.7
2018-04-04	14:00:00	54	R	in_cylinder	soil	0.1	14.7
2018-04-04	15:00:00	54	R	in_cylinder	soil	0.1	13.2
2018-04-04	16:00:00	54	R	in_cylinder	soil	0.1	12.7
2018-04-04	17:00:00	54	R	in_cylinder	soil	0.1	12.2
2018-04-04	18:00:00	54	R	in_cylinder	soil	0.1	11.7
2018-04-04	19:00:00	54	R	in_cylinder	soil	0.1	11.7
2018-04-04	20:00:00	54	R	in_cylinder	soil	0.1	11.2
2018-04-04	21:00:00	54	R	in_cylinder	soil	0.1	10.7
2018-04-04	22:00:00	54	R	in_cylinder	soil	0.1	10.7
2018-04-04	23:00:00	54	R	in_cylinder	soil	0.1	10.2
2018-04-05	00:00:00	54	R	in_cylinder	soil	0.1	10.2
2018-04-05	01:00:00	54	R	in_cylinder	soil	0.1	9.7
2018-04-05	02:00:00	54	R	in_cylinder	soil	0.1	9.7
2018-04-05	03:00:00	54	R	in_cylinder	soil	0.1	9.7
2018-04-05	04:00:00	54	R	in_cylinder	soil	0.1	9.7
2018-04-05	05:00:00	54	R	in_cylinder	soil	0.1	9.7
2018-04-05	06:00:00	54	R	in_cylinder	soil	0.1	9.7
2018-04-05	07:00:00	54	R	in_cylinder	soil	0.1	9.1
2018-04-05	08:00:00	54	R	in_cylinder	soil	0.1	9.1
2018-04-05	09:00:00	54	R	in_cylinder	soil	0.1	9.7
2018-04-05	10:00:00	54	R	in_cylinder	soil	0.1	11.2
2018-04-05	11:00:00	54	R	in_cylinder	soil	0.1	11.7
2018-04-05	12:00:00	54	R	in_cylinder	soil	0.1	12.7
2018-04-05	13:00:00	54	R	in_cylinder	soil	0.1	13.7
2018-04-05	14:00:00	54	R	in_cylinder	soil	0.1	13.2
2018-04-05	15:00:00	54	R	in_cylinder	soil	0.1	13.7
2018-04-05	16:00:00	54	R	in_cylinder	soil	0.1	14.2
2018-04-05	17:00:00	54	R	in_cylinder	soil	0.1	14.2
2018-04-05	18:00:00	54	R	in_cylinder	soil	0.1	13.2
2018-04-05	19:00:00	54	R	in_cylinder	soil	0.1	12.7
2018-04-05	20:00:00	54	R	in_cylinder	soil	0.1	11.7
2018-04-05	21:00:00	54	R	in_cylinder	soil	0.1	11.2
2018-04-05	22:00:00	54	R	in_cylinder	soil	0.1	10.7
2018-04-05	23:00:00	54	R	in_cylinder	soil	0.1	10.2
2018-04-06	00:00:00	54	R	in_cylinder	soil	0.1	9.7
2018-04-06	01:00:00	54	R	in_cylinder	soil	0.1	9.1
2018-04-06	02:00:00	54	R	in_cylinder	soil	0.1	8.6
2018-04-06	03:00:00	54	R	in_cylinder	soil	0.1	8.1
2018-04-06	04:00:00	54	R	in_cylinder	soil	0.1	7.6
2018-04-06	05:00:00	54	R	in_cylinder	soil	0.1	7.6
2018-04-06	06:00:00	54	R	in_cylinder	soil	0.1	7.1
2018-04-06	07:00:00	54	R	in_cylinder	soil	0.1	7.1
2018-04-06	08:00:00	54	R	in_cylinder	soil	0.1	7.1
2018-04-06	09:00:00	54	R	in_cylinder	soil	0.1	8.1
2018-04-06	10:00:00	54	R	in_cylinder	soil	0.1	9.1
2018-04-06	11:00:00	54	R	in_cylinder	soil	0.1	10.7
2018-04-06	12:00:00	54	R	in_cylinder	soil	0.1	12.2
2018-04-06	13:00:00	54	R	in_cylinder	soil	0.1	14.2
2018-04-06	14:00:00	54	R	in_cylinder	soil	0.1	15.7
2018-04-06	15:00:00	54	R	in_cylinder	soil	0.1	15.7
2018-04-06	16:00:00	54	R	in_cylinder	soil	0.1	15.2
2018-04-06	17:00:00	54	R	in_cylinder	soil	0.1	14.7
2018-04-06	18:00:00	54	R	in_cylinder	soil	0.1	14.2
2018-04-06	19:00:00	54	R	in_cylinder	soil	0.1	13.7
2018-04-06	20:00:00	54	R	in_cylinder	soil	0.1	12.7
2018-04-06	21:00:00	54	R	in_cylinder	soil	0.1	12.2
2018-04-06	22:00:00	54	R	in_cylinder	soil	0.1	11.7
2018-04-06	23:00:00	54	R	in_cylinder	soil	0.1	11.2
2018-04-07	00:00:00	54	R	in_cylinder	soil	0.1	10.7
2018-04-07	01:00:00	54	R	in_cylinder	soil	0.1	10.2
2018-04-07	02:00:00	54	R	in_cylinder	soil	0.1	9.7
2018-04-07	03:00:00	54	R	in_cylinder	soil	0.1	9.1
2018-04-07	04:00:00	54	R	in_cylinder	soil	0.1	8.6
2018-04-07	05:00:00	54	R	in_cylinder	soil	0.1	8.6
2018-04-07	06:00:00	54	R	in_cylinder	soil	0.1	8.1
2018-04-07	07:00:00	54	R	in_cylinder	soil	0.1	8.1
2018-04-07	08:00:00	54	R	in_cylinder	soil	0.1	8.1
2018-04-07	09:00:00	54	R	in_cylinder	soil	0.1	9.1
2018-04-07	10:00:00	54	R	in_cylinder	soil	0.1	10.2
2018-04-07	11:00:00	54	R	in_cylinder	soil	0.1	12.2
2018-04-07	12:00:00	54	R	in_cylinder	soil	0.1	13.7
2018-04-07	13:00:00	54	R	in_cylinder	soil	0.1	16.2
2018-04-07	14:00:00	54	R	in_cylinder	soil	0.1	17.7
2018-04-07	15:00:00	54	R	in_cylinder	soil	0.1	18.2
2018-04-07	16:00:00	54	R	in_cylinder	soil	0.1	17.7
2018-04-07	17:00:00	54	R	in_cylinder	soil	0.1	17.2
2018-04-07	18:00:00	54	R	in_cylinder	soil	0.1	16.7
2018-04-07	19:00:00	54	R	in_cylinder	soil	0.1	15.7
2018-04-07	20:00:00	54	R	in_cylinder	soil	0.1	14.7
2018-04-07	21:00:00	54	R	in_cylinder	soil	0.1	14.2
2018-04-07	22:00:00	54	R	in_cylinder	soil	0.1	13.7
2018-04-07	23:00:00	54	R	in_cylinder	soil	0.1	13.2
2018-04-08	00:00:00	54	R	in_cylinder	soil	0.1	12.7
2018-04-08	01:00:00	54	R	in_cylinder	soil	0.1	12.2
2018-04-08	02:00:00	54	R	in_cylinder	soil	0.1	11.7
2018-04-08	03:00:00	54	R	in_cylinder	soil	0.1	11.2
2018-04-08	04:00:00	54	R	in_cylinder	soil	0.1	11.2
2018-04-08	05:00:00	54	R	in_cylinder	soil	0.1	10.7
2018-04-08	06:00:00	54	R	in_cylinder	soil	0.1	10.7
2018-04-08	07:00:00	54	R	in_cylinder	soil	0.1	10.2
2018-04-08	08:00:00	54	R	in_cylinder	soil	0.1	10.7
2018-04-08	09:00:00	54	R	in_cylinder	soil	0.1	11.2
2018-04-08	10:00:00	54	R	in_cylinder	soil	0.1	12.2
2018-04-08	11:00:00	54	R	in_cylinder	soil	0.1	13.7
2018-04-08	12:00:00	54	R	in_cylinder	soil	0.1	15.2
2018-04-08	13:00:00	54	R	in_cylinder	soil	0.1	16.2
2018-04-08	14:00:00	54	R	in_cylinder	soil	0.1	17.7
2018-04-08	15:00:00	54	R	in_cylinder	soil	0.1	17.7
2018-04-08	16:00:00	54	R	in_cylinder	soil	0.1	17.7
2018-04-08	17:00:00	54	R	in_cylinder	soil	0.1	17.2
2018-04-08	18:00:00	54	R	in_cylinder	soil	0.1	16.7
2018-04-08	19:00:00	54	R	in_cylinder	soil	0.1	16.2
2018-04-08	20:00:00	54	R	in_cylinder	soil	0.1	15.2
2018-04-08	21:00:00	54	R	in_cylinder	soil	0.1	14.7
2018-04-08	22:00:00	54	R	in_cylinder	soil	0.1	14.7
2018-04-08	23:00:00	54	R	in_cylinder	soil	0.1	13.7
2018-04-09	00:00:00	54	R	in_cylinder	soil	0.1	13.7
2018-04-09	01:00:00	54	R	in_cylinder	soil	0.1	13.2
2018-04-09	02:00:00	54	R	in_cylinder	soil	0.1	12.7
2018-04-09	03:00:00	54	R	in_cylinder	soil	0.1	12.7
2018-04-09	04:00:00	54	R	in_cylinder	soil	0.1	12.2
2018-04-09	05:00:00	54	R	in_cylinder	soil	0.1	12.2
2018-04-09	06:00:00	54	R	in_cylinder	soil	0.1	11.7
2018-04-09	07:00:00	54	R	in_cylinder	soil	0.1	11.7
2018-04-09	08:00:00	54	R	in_cylinder	soil	0.1	11.7
2018-04-09	09:00:00	54	R	in_cylinder	soil	0.1	12.2
2018-04-09	10:00:00	54	R	in_cylinder	soil	0.1	13.2
2018-04-09	11:00:00	54	R	in_cylinder	soil	0.1	13.7
2018-04-09	12:00:00	54	R	in_cylinder	soil	0.1	14.7
2018-04-09	13:00:00	54	R	in_cylinder	soil	0.1	16.2
2018-04-09	14:00:00	54	R	in_cylinder	soil	0.1	17.2
2018-04-09	15:00:00	54	R	in_cylinder	soil	0.1	17.2
2018-04-09	16:00:00	54	R	in_cylinder	soil	0.1	16.2
2018-04-09	17:00:00	54	R	in_cylinder	soil	0.1	16.2
2018-04-09	18:00:00	54	R	in_cylinder	soil	0.1	15.7
2018-04-09	19:00:00	54	R	in_cylinder	soil	0.1	15.2
2018-04-09	20:00:00	54	R	in_cylinder	soil	0.1	14.7
2018-04-09	21:00:00	54	R	in_cylinder	soil	0.1	14.2
2018-04-09	22:00:00	54	R	in_cylinder	soil	0.1	14.2
2018-04-09	23:00:00	54	R	in_cylinder	soil	0.1	13.7
2018-04-10	00:00:00	54	R	in_cylinder	soil	0.1	13.7
2018-04-10	01:00:00	54	R	in_cylinder	soil	0.1	13.2
2018-04-10	02:00:00	54	R	in_cylinder	soil	0.1	12.7
2018-04-10	03:00:00	54	R	in_cylinder	soil	0.1	12.7
2018-04-10	04:00:00	54	R	in_cylinder	soil	0.1	12.2
2018-04-10	05:00:00	54	R	in_cylinder	soil	0.1	12.2
2018-04-10	06:00:00	54	R	in_cylinder	soil	0.1	12.2
2018-04-10	07:00:00	54	R	in_cylinder	soil	0.1	11.7
2018-04-10	08:00:00	54	R	in_cylinder	soil	0.1	12.2
2018-04-10	09:00:00	54	R	in_cylinder	soil	0.1	12.2
2018-04-10	10:00:00	54	R	in_cylinder	soil	0.1	12.7
2018-04-10	11:00:00	54	R	in_cylinder	soil	0.1	12.7
2018-04-10	12:00:00	54	R	in_cylinder	soil	0.1	12.2
2018-04-10	13:00:00	54	R	in_cylinder	soil	0.1	12.2
2018-04-10	14:00:00	54	R	in_cylinder	soil	0.1	12.2
2018-04-10	15:00:00	54	R	in_cylinder	soil	0.1	12.2
2018-04-10	16:00:00	54	R	in_cylinder	soil	0.1	12.2
2018-04-10	17:00:00	54	R	in_cylinder	soil	0.1	12.7
2018-04-10	18:00:00	54	R	in_cylinder	soil	0.1	12.7
2018-04-10	19:00:00	54	R	in_cylinder	soil	0.1	12.2
2018-04-10	20:00:00	54	R	in_cylinder	soil	0.1	11.7
2018-04-10	21:00:00	54	R	in_cylinder	soil	0.1	11.2
2018-04-10	22:00:00	54	R	in_cylinder	soil	0.1	10.7
2018-04-10	23:00:00	54	R	in_cylinder	soil	0.1	10.2
2018-04-11	00:00:00	54	R	in_cylinder	soil	0.1	10.2
2018-04-11	01:00:00	54	R	in_cylinder	soil	0.1	9.7
2018-04-11	02:00:00	54	R	in_cylinder	soil	0.1	9.1
2018-04-11	03:00:00	54	R	in_cylinder	soil	0.1	9.1
2018-04-11	04:00:00	54	R	in_cylinder	soil	0.1	8.6
2018-04-11	05:00:00	54	R	in_cylinder	soil	0.1	8.1
2018-04-11	06:00:00	54	R	in_cylinder	soil	0.1	8.1
2018-04-11	07:00:00	54	R	in_cylinder	soil	0.1	8.1
2018-04-11	08:00:00	54	R	in_cylinder	soil	0.1	8.1
2018-04-11	09:00:00	54	R	in_cylinder	soil	0.1	9.1
2018-04-11	10:00:00	54	R	in_cylinder	soil	0.1	10.2
2018-04-11	11:00:00	54	R	in_cylinder	soil	0.1	11.2
2018-04-11	12:00:00	54	R	in_cylinder	soil	0.1	12.7
2018-04-11	13:00:00	54	R	in_cylinder	soil	0.1	14.7
2018-04-11	14:00:00	54	R	in_cylinder	soil	0.1	16.2
2018-04-11	15:00:00	54	R	in_cylinder	soil	0.1	16.2
2018-04-11	16:00:00	54	R	in_cylinder	soil	0.1	15.7
2018-04-11	17:00:00	54	R	in_cylinder	soil	0.1	15.2
2018-04-11	18:00:00	54	R	in_cylinder	soil	0.1	14.7
2018-04-11	19:00:00	54	R	in_cylinder	soil	0.1	14.2
2018-04-11	20:00:00	54	R	in_cylinder	soil	0.1	13.7
2018-04-11	21:00:00	54	R	in_cylinder	soil	0.1	13.7
2018-04-11	22:00:00	54	R	in_cylinder	soil	0.1	13.2
2018-04-11	23:00:00	54	R	in_cylinder	soil	0.1	12.7
2018-04-12	00:00:00	54	R	in_cylinder	soil	0.1	12.2
2018-04-12	01:00:00	54	R	in_cylinder	soil	0.1	12.2
2018-04-12	02:00:00	54	R	in_cylinder	soil	0.1	11.7
2018-04-12	03:00:00	54	R	in_cylinder	soil	0.1	11.2
2018-04-12	04:00:00	54	R	in_cylinder	soil	0.1	11.2
2018-04-12	05:00:00	54	R	in_cylinder	soil	0.1	11.2
2018-04-12	06:00:00	54	R	in_cylinder	soil	0.1	10.7
2018-04-12	07:00:00	54	R	in_cylinder	soil	0.1	10.7
2018-04-12	08:00:00	54	R	in_cylinder	soil	0.1	10.7
2018-04-12	09:00:00	54	R	in_cylinder	soil	0.1	11.7
2018-04-12	10:00:00	54	R	in_cylinder	soil	0.1	12.2
2018-04-12	11:00:00	54	R	in_cylinder	soil	0.1	13.2
2018-04-12	12:00:00	54	R	in_cylinder	soil	0.1	14.7
2018-04-12	13:00:00	54	R	in_cylinder	soil	0.1	16.7
2018-04-12	14:00:00	54	R	in_cylinder	soil	0.1	18.2
2018-04-12	15:00:00	54	R	in_cylinder	soil	0.1	18.2
2018-04-12	16:00:00	54	R	in_cylinder	soil	0.1	17.7
2018-04-12	17:00:00	54	R	in_cylinder	soil	0.1	17.2
2018-04-12	18:00:00	54	R	in_cylinder	soil	0.1	16.7
2018-04-12	19:00:00	54	R	in_cylinder	soil	0.1	15.7
2018-04-12	20:00:00	54	R	in_cylinder	soil	0.1	15.2
2018-04-12	21:00:00	54	R	in_cylinder	soil	0.1	14.2
2018-04-12	22:00:00	54	R	in_cylinder	soil	0.1	13.7
2018-04-12	23:00:00	54	R	in_cylinder	soil	0.1	12.7
2018-04-13	00:00:00	54	R	in_cylinder	soil	0.1	12.2
2018-04-13	01:00:00	54	R	in_cylinder	soil	0.1	12.2
2018-04-13	02:00:00	54	R	in_cylinder	soil	0.1	11.7
2018-04-13	03:00:00	54	R	in_cylinder	soil	0.1	11.7
2018-04-13	04:00:00	54	R	in_cylinder	soil	0.1	11.2
2018-04-13	05:00:00	54	R	in_cylinder	soil	0.1	11.2
2018-04-13	06:00:00	54	R	in_cylinder	soil	0.1	11.2
2018-04-13	07:00:00	54	R	in_cylinder	soil	0.1	11.2
2018-04-13	08:00:00	54	R	in_cylinder	soil	0.1	11.2
2018-04-13	09:00:00	54	R	in_cylinder	soil	0.1	11.2
2018-04-13	10:00:00	54	R	in_cylinder	soil	0.1	11.7
2018-04-13	11:00:00	54	R	in_cylinder	soil	0.1	13.2
2018-04-13	12:00:00	54	R	in_cylinder	soil	0.1	14.2
2018-04-13	13:00:00	54	R	in_cylinder	soil	0.1	14.2
2018-04-13	14:00:00	54	R	in_cylinder	soil	0.1	15.7
2018-04-13	15:00:00	54	R	in_cylinder	soil	0.1	16.2
2018-04-13	16:00:00	54	R	in_cylinder	soil	0.1	16.2
2018-04-13	17:00:00	54	R	in_cylinder	soil	0.1	16.2
2018-04-13	18:00:00	54	R	in_cylinder	soil	0.1	15.7
2018-04-13	19:00:00	54	R	in_cylinder	soil	0.1	15.2
2018-04-13	20:00:00	54	R	in_cylinder	soil	0.1	14.7
2018-04-13	21:00:00	54	R	in_cylinder	soil	0.1	14.2
2018-04-13	22:00:00	54	R	in_cylinder	soil	0.1	13.7
2018-04-13	23:00:00	54	R	in_cylinder	soil	0.1	12.7
2018-04-14	00:00:00	54	R	in_cylinder	soil	0.1	12.2
2018-04-14	01:00:00	54	R	in_cylinder	soil	0.1	11.7
2018-04-14	02:00:00	54	R	in_cylinder	soil	0.1	11.2
2018-04-14	03:00:00	54	R	in_cylinder	soil	0.1	10.7
2018-04-14	04:00:00	54	R	in_cylinder	soil	0.1	10.7
2018-04-14	05:00:00	54	R	in_cylinder	soil	0.1	10.2
2018-04-14	06:00:00	54	R	in_cylinder	soil	0.1	10.2
2018-04-14	07:00:00	54	R	in_cylinder	soil	0.1	9.7
2018-04-14	08:00:00	54	R	in_cylinder	soil	0.1	10.2
2018-04-14	09:00:00	54	R	in_cylinder	soil	0.1	10.7
2018-04-14	10:00:00	54	R	in_cylinder	soil	0.1	11.7
2018-04-14	11:00:00	54	R	in_cylinder	soil	0.1	12.7
2018-04-14	12:00:00	54	R	in_cylinder	soil	0.1	14.2
2018-04-14	13:00:00	54	R	in_cylinder	soil	0.1	15.7
2018-04-14	14:00:00	54	R	in_cylinder	soil	0.1	16.7
2018-04-14	15:00:00	54	R	in_cylinder	soil	0.1	16.7
2018-04-14	16:00:00	54	R	in_cylinder	soil	0.1	16.7
2018-04-14	17:00:00	54	R	in_cylinder	soil	0.1	16.7
2018-04-14	18:00:00	54	R	in_cylinder	soil	0.1	16.7
2018-04-14	19:00:00	54	R	in_cylinder	soil	0.1	16.2
2018-04-14	20:00:00	54	R	in_cylinder	soil	0.1	15.7
2018-04-14	21:00:00	54	R	in_cylinder	soil	0.1	14.7
2018-04-14	22:00:00	54	R	in_cylinder	soil	0.1	14.7
2018-04-14	23:00:00	54	R	in_cylinder	soil	0.1	14.2
2018-04-15	00:00:00	54	R	in_cylinder	soil	0.1	13.7
2018-04-15	01:00:00	54	R	in_cylinder	soil	0.1	13.7
2018-04-15	02:00:00	54	R	in_cylinder	soil	0.1	13.2
2018-04-15	03:00:00	54	R	in_cylinder	soil	0.1	13.2
2018-04-15	04:00:00	54	R	in_cylinder	soil	0.1	12.7
2018-04-15	05:00:00	54	R	in_cylinder	soil	0.1	12.7
2018-04-15	06:00:00	54	R	in_cylinder	soil	0.1	12.2
2018-04-15	07:00:00	54	R	in_cylinder	soil	0.1	11.7
2018-04-15	08:00:00	54	R	in_cylinder	soil	0.1	11.7
2018-04-15	09:00:00	54	R	in_cylinder	soil	0.1	12.7
2018-04-15	10:00:00	54	R	in_cylinder	soil	0.1	13.7
2018-04-15	11:00:00	54	R	in_cylinder	soil	0.1	14.2
2018-04-15	12:00:00	54	R	in_cylinder	soil	0.1	15.7
2018-04-15	13:00:00	54	R	in_cylinder	soil	0.1	16.7
2018-04-15	14:00:00	54	R	in_cylinder	soil	0.1	16.7
2018-04-15	15:00:00	54	R	in_cylinder	soil	0.1	17.2
2018-04-15	16:00:00	54	R	in_cylinder	soil	0.1	17.2
2018-04-15	17:00:00	54	R	in_cylinder	soil	0.1	17.2
2018-04-15	18:00:00	54	R	in_cylinder	soil	0.1	17.2
2018-04-15	19:00:00	54	R	in_cylinder	soil	0.1	16.7
2018-04-15	20:00:00	54	R	in_cylinder	soil	0.1	16.2
2018-04-15	21:00:00	54	R	in_cylinder	soil	0.1	15.7
2018-04-15	22:00:00	54	R	in_cylinder	soil	0.1	15.2
2018-04-15	23:00:00	54	R	in_cylinder	soil	0.1	14.7
2018-04-16	00:00:00	54	R	in_cylinder	soil	0.1	14.7
2018-04-16	01:00:00	54	R	in_cylinder	soil	0.1	14.2
2018-04-16	02:00:00	54	R	in_cylinder	soil	0.1	14.2
2018-04-16	03:00:00	54	R	in_cylinder	soil	0.1	14.2
2018-04-16	04:00:00	54	R	in_cylinder	soil	0.1	13.7
2018-04-16	05:00:00	54	R	in_cylinder	soil	0.1	13.7
2018-04-16	06:00:00	54	R	in_cylinder	soil	0.1	13.2
2018-04-16	07:00:00	54	R	in_cylinder	soil	0.1	13.2
2018-04-16	08:00:00	54	R	in_cylinder	soil	0.1	13.2
2018-04-16	09:00:00	54	R	in_cylinder	soil	0.1	14.2
2018-04-16	10:00:00	54	R	in_cylinder	soil	0.1	14.7
2018-04-16	11:00:00	54	R	in_cylinder	soil	0.1	15.7
2018-04-16	12:00:00	54	R	in_cylinder	soil	0.1	16.2
2018-04-16	13:00:00	54	R	in_cylinder	soil	0.1	18.2
2018-04-16	14:00:00	54	R	in_cylinder	soil	0.1	18.7
2018-04-16	15:00:00	54	R	in_cylinder	soil	0.1	18.7
2018-04-16	16:00:00	54	R	in_cylinder	soil	0.1	18.7
2018-04-16	17:00:00	54	R	in_cylinder	soil	0.1	18.2
2018-04-16	18:00:00	54	R	in_cylinder	soil	0.1	17.7
2018-04-16	19:00:00	54	R	in_cylinder	soil	0.1	17.2
2018-04-16	20:00:00	54	R	in_cylinder	soil	0.1	16.7
2018-04-16	21:00:00	54	R	in_cylinder	soil	0.1	16.2
2018-04-16	22:00:00	54	R	in_cylinder	soil	0.1	15.7
2018-04-16	23:00:00	54	R	in_cylinder	soil	0.1	15.2
2018-04-17	00:00:00	54	R	in_cylinder	soil	0.1	15.2
2018-04-17	01:00:00	54	R	in_cylinder	soil	0.1	14.7
2018-04-17	02:00:00	54	R	in_cylinder	soil	0.1	14.7
2018-04-17	03:00:00	54	R	in_cylinder	soil	0.1	14.2
2018-04-17	04:00:00	54	R	in_cylinder	soil	0.1	13.7
2018-04-17	05:00:00	54	R	in_cylinder	soil	0.1	13.2
2018-04-17	06:00:00	54	R	in_cylinder	soil	0.1	12.7
2018-04-17	07:00:00	54	R	in_cylinder	soil	0.1	12.7
2018-04-17	08:00:00	54	R	in_cylinder	soil	0.1	12.7
2018-04-17	09:00:00	54	R	in_cylinder	soil	0.1	13.7
2018-04-17	10:00:00	54	R	in_cylinder	soil	0.1	14.2
2018-04-17	11:00:00	54	R	in_cylinder	soil	0.1	15.2
2018-04-17	12:00:00	54	R	in_cylinder	soil	0.1	16.2
2018-04-17	13:00:00	54	R	in_cylinder	soil	0.1	17.7
2018-04-17	14:00:00	54	R	in_cylinder	soil	0.1	19.2
2018-04-17	15:00:00	54	R	in_cylinder	soil	0.1	19.2
2018-04-17	16:00:00	54	R	in_cylinder	soil	0.1	19.2
2018-04-17	17:00:00	54	R	in_cylinder	soil	0.1	18.7
2018-04-17	18:00:00	54	R	in_cylinder	soil	0.1	18.7
2018-04-17	19:00:00	54	R	in_cylinder	soil	0.1	18.2
2018-04-17	20:00:00	54	R	in_cylinder	soil	0.1	17.2
2018-04-17	21:00:00	54	R	in_cylinder	soil	0.1	16.7
2018-04-17	22:00:00	54	R	in_cylinder	soil	0.1	15.7
2018-04-17	23:00:00	54	R	in_cylinder	soil	0.1	15.2
2018-04-18	00:00:00	54	R	in_cylinder	soil	0.1	14.7
2018-04-18	01:00:00	54	R	in_cylinder	soil	0.1	14.2
2018-04-18	02:00:00	54	R	in_cylinder	soil	0.1	13.7
2018-04-18	03:00:00	54	R	in_cylinder	soil	0.1	13.2
2018-04-18	04:00:00	54	R	in_cylinder	soil	0.1	13.2
2018-04-18	05:00:00	54	R	in_cylinder	soil	0.1	12.7
2018-04-18	06:00:00	54	R	in_cylinder	soil	0.1	12.2
2018-04-18	07:00:00	54	R	in_cylinder	soil	0.1	12.2
2018-04-18	08:00:00	54	R	in_cylinder	soil	0.1	12.2
2018-04-18	09:00:00	54	R	in_cylinder	soil	0.1	13.2
2018-04-18	10:00:00	54	R	in_cylinder	soil	0.1	14.2
2018-04-18	11:00:00	54	R	in_cylinder	soil	0.1	15.2
2018-04-18	12:00:00	54	R	in_cylinder	soil	0.1	16.2
2018-04-18	13:00:00	54	R	in_cylinder	soil	0.1	17.7
2018-04-18	14:00:00	54	R	in_cylinder	soil	0.1	19.2
2018-04-18	15:00:00	54	R	in_cylinder	soil	0.1	19.2
2018-04-18	16:00:00	54	R	in_cylinder	soil	0.1	19.2
2018-04-18	17:00:00	54	R	in_cylinder	soil	0.1	18.7
2018-04-18	18:00:00	54	R	in_cylinder	soil	0.1	18.7
2018-04-18	19:00:00	54	R	in_cylinder	soil	0.1	18.2
2018-04-18	20:00:00	54	R	in_cylinder	soil	0.1	17.7
2018-04-18	21:00:00	54	R	in_cylinder	soil	0.1	16.7
2018-04-18	22:00:00	54	R	in_cylinder	soil	0.1	16.2
2018-04-18	23:00:00	54	R	in_cylinder	soil	0.1	15.7
2018-04-19	00:00:00	54	R	in_cylinder	soil	0.1	15.2
2018-04-19	01:00:00	54	R	in_cylinder	soil	0.1	14.7
2018-04-19	02:00:00	54	R	in_cylinder	soil	0.1	14.2
2018-04-19	03:00:00	54	R	in_cylinder	soil	0.1	13.7
2018-04-19	04:00:00	54	R	in_cylinder	soil	0.1	13.2
2018-04-19	05:00:00	54	R	in_cylinder	soil	0.1	13.2
2018-04-19	06:00:00	54	R	in_cylinder	soil	0.1	12.7
2018-04-19	07:00:00	54	R	in_cylinder	soil	0.1	12.7
2018-04-19	08:00:00	54	R	in_cylinder	soil	0.1	12.7
2018-04-19	09:00:00	54	R	in_cylinder	soil	0.1	13.7
2018-04-19	10:00:00	54	R	in_cylinder	soil	0.1	14.7
2018-04-19	11:00:00	54	R	in_cylinder	soil	0.1	15.7
2018-04-19	12:00:00	54	R	in_cylinder	soil	0.1	16.7
2018-04-19	13:00:00	54	R	in_cylinder	soil	0.1	18.2
2018-04-19	14:00:00	54	R	in_cylinder	soil	0.1	19.7
2018-04-19	15:00:00	54	R	in_cylinder	soil	0.1	19.7
2018-04-19	16:00:00	54	R	in_cylinder	soil	0.1	19.7
2018-04-19	17:00:00	54	R	in_cylinder	soil	0.1	19.7
2018-04-19	18:00:00	54	R	in_cylinder	soil	0.1	19.2
2018-04-19	19:00:00	54	R	in_cylinder	soil	0.1	18.7
2018-04-19	20:00:00	54	R	in_cylinder	soil	0.1	18.2
2018-04-19	21:00:00	54	R	in_cylinder	soil	0.1	17.2
2018-04-19	22:00:00	54	R	in_cylinder	soil	0.1	16.7
2018-04-19	23:00:00	54	R	in_cylinder	soil	0.1	16.2
2018-04-20	00:00:00	54	R	in_cylinder	soil	0.1	15.2
2018-04-20	01:00:00	54	R	in_cylinder	soil	0.1	15.2
2018-04-20	02:00:00	54	R	in_cylinder	soil	0.1	14.7
2018-04-20	03:00:00	54	R	in_cylinder	soil	0.1	14.2
2018-04-20	04:00:00	54	R	in_cylinder	soil	0.1	13.7
2018-04-20	05:00:00	54	R	in_cylinder	soil	0.1	13.2
2018-04-20	06:00:00	54	R	in_cylinder	soil	0.1	12.7
2018-04-20	07:00:00	54	R	in_cylinder	soil	0.1	12.7
2018-04-20	08:00:00	54	R	in_cylinder	soil	0.1	13.2
2018-04-20	09:00:00	54	R	in_cylinder	soil	0.1	13.7
2018-04-20	10:00:00	54	R	in_cylinder	soil	0.1	14.7
2018-04-20	11:00:00	54	R	in_cylinder	soil	0.1	15.7
2018-04-20	12:00:00	54	R	in_cylinder	soil	0.1	16.7
2018-04-20	13:00:00	54	R	in_cylinder	soil	0.1	18.2
2018-04-20	14:00:00	54	R	in_cylinder	soil	0.1	19.7
2018-04-20	15:00:00	54	R	in_cylinder	soil	0.1	19.7
2018-04-20	16:00:00	54	R	in_cylinder	soil	0.1	19.7
2018-04-20	17:00:00	54	R	in_cylinder	soil	0.1	19.7
2018-04-20	18:00:00	54	R	in_cylinder	soil	0.1	19.2
2018-04-20	19:00:00	54	R	in_cylinder	soil	0.1	19.2
2018-04-20	20:00:00	54	R	in_cylinder	soil	0.1	18.2
2018-04-20	21:00:00	54	R	in_cylinder	soil	0.1	17.7
2018-04-20	22:00:00	54	R	in_cylinder	soil	0.1	16.7
2018-04-20	23:00:00	54	R	in_cylinder	soil	0.1	16.2
2018-04-21	00:00:00	54	R	in_cylinder	soil	0.1	15.7
2018-04-21	01:00:00	54	R	in_cylinder	soil	0.1	15.2
2018-04-21	02:00:00	54	R	in_cylinder	soil	0.1	14.7
2018-04-21	03:00:00	54	R	in_cylinder	soil	0.1	14.7
2018-04-21	04:00:00	54	R	in_cylinder	soil	0.1	14.2
2018-04-21	05:00:00	54	R	in_cylinder	soil	0.1	13.7
2018-04-21	06:00:00	54	R	in_cylinder	soil	0.1	13.2
2018-04-21	07:00:00	54	R	in_cylinder	soil	0.1	13.2
2018-04-21	08:00:00	54	R	in_cylinder	soil	0.1	13.7
2018-04-21	09:00:00	54	R	in_cylinder	soil	0.1	14.2
2018-04-21	10:00:00	54	R	in_cylinder	soil	0.1	15.7
2018-04-21	11:00:00	54	R	in_cylinder	soil	0.1	16.7
2018-04-21	12:00:00	54	R	in_cylinder	soil	0.1	17.2
2018-04-21	13:00:00	54	R	in_cylinder	soil	0.1	18.7
2018-04-21	14:00:00	54	R	in_cylinder	soil	0.1	20.2
2018-04-21	15:00:00	54	R	in_cylinder	soil	0.1	20.2
2018-04-21	16:00:00	54	R	in_cylinder	soil	0.1	20.2
2018-04-21	17:00:00	54	R	in_cylinder	soil	0.1	20.2
2018-04-21	18:00:00	54	R	in_cylinder	soil	0.1	19.7
2018-04-21	19:00:00	54	R	in_cylinder	soil	0.1	19.7
2018-04-21	20:00:00	54	R	in_cylinder	soil	0.1	18.7
2018-04-21	21:00:00	54	R	in_cylinder	soil	0.1	18.2
2018-04-21	22:00:00	54	R	in_cylinder	soil	0.1	17.2
2018-04-21	23:00:00	54	R	in_cylinder	soil	0.1	16.7
2018-04-22	00:00:00	54	R	in_cylinder	soil	0.1	16.2
2018-04-22	01:00:00	54	R	in_cylinder	soil	0.1	15.7
2018-04-22	02:00:00	54	R	in_cylinder	soil	0.1	15.2
2018-04-22	03:00:00	54	R	in_cylinder	soil	0.1	14.7
2018-04-22	04:00:00	54	R	in_cylinder	soil	0.1	14.7
2018-04-22	05:00:00	54	R	in_cylinder	soil	0.1	14.2
2018-04-22	06:00:00	54	R	in_cylinder	soil	0.1	13.7
2018-04-22	07:00:00	54	R	in_cylinder	soil	0.1	13.7
2018-04-22	08:00:00	54	R	in_cylinder	soil	0.1	14.2
2018-04-22	09:00:00	54	R	in_cylinder	soil	0.1	14.7
2018-04-22	10:00:00	54	R	in_cylinder	soil	0.1	15.7
2018-04-22	11:00:00	54	R	in_cylinder	soil	0.1	16.7
2018-04-22	12:00:00	54	R	in_cylinder	soil	0.1	17.7
2018-04-22	13:00:00	54	R	in_cylinder	soil	0.1	19.2
2018-04-22	14:00:00	54	R	in_cylinder	soil	0.1	20.2
2018-04-22	15:00:00	54	R	in_cylinder	soil	0.1	19.7
2018-04-22	16:00:00	54	R	in_cylinder	soil	0.1	19.7
2018-04-22	17:00:00	54	R	in_cylinder	soil	0.1	19.7
2018-04-22	18:00:00	54	R	in_cylinder	soil	0.1	19.2
2018-04-22	19:00:00	54	R	in_cylinder	soil	0.1	19.2
2018-04-22	20:00:00	54	R	in_cylinder	soil	0.1	18.2
2018-04-22	21:00:00	54	R	in_cylinder	soil	0.1	17.7
2018-04-22	22:00:00	54	R	in_cylinder	soil	0.1	17.2
2018-04-22	23:00:00	54	R	in_cylinder	soil	0.1	16.7
2018-04-23	00:00:00	54	R	in_cylinder	soil	0.1	16.2
2018-04-23	01:00:00	54	R	in_cylinder	soil	0.1	15.7
2018-04-23	02:00:00	54	R	in_cylinder	soil	0.1	15.7
2018-04-23	03:00:00	54	R	in_cylinder	soil	0.1	15.7
2018-04-23	04:00:00	54	R	in_cylinder	soil	0.1	15.2
2018-04-23	05:00:00	54	R	in_cylinder	soil	0.1	15.2
2018-04-23	06:00:00	54	R	in_cylinder	soil	0.1	14.7
2018-04-23	07:00:00	54	R	in_cylinder	soil	0.1	14.7
2018-04-23	08:00:00	54	R	in_cylinder	soil	0.1	15.2
2018-04-23	09:00:00	54	R	in_cylinder	soil	0.1	15.7
2018-04-23	10:00:00	54	R	in_cylinder	soil	0.1	16.2
2018-04-23	11:00:00	54	R	in_cylinder	soil	0.1	16.7
2018-04-23	12:00:00	54	R	in_cylinder	soil	0.1	16.7
2018-04-23	13:00:00	54	R	in_cylinder	soil	0.1	16.7
2018-04-23	14:00:00	54	R	in_cylinder	soil	0.1	17.7
2018-04-23	15:00:00	54	R	in_cylinder	soil	0.1	18.2
2018-04-23	16:00:00	54	R	in_cylinder	soil	0.1	17.7
2018-04-23	17:00:00	54	R	in_cylinder	soil	0.1	17.2
2018-04-23	18:00:00	54	R	in_cylinder	soil	0.1	17.2
2018-04-23	19:00:00	54	R	in_cylinder	soil	0.1	16.7
2018-04-23	20:00:00	54	R	in_cylinder	soil	0.1	16.7
2018-04-23	21:00:00	54	R	in_cylinder	soil	0.1	16.2
2018-04-23	22:00:00	54	R	in_cylinder	soil	0.1	15.7
2018-04-23	23:00:00	54	R	in_cylinder	soil	0.1	15.2
2018-04-24	00:00:00	54	R	in_cylinder	soil	0.1	15.2
2018-04-24	01:00:00	54	R	in_cylinder	soil	0.1	15.2
2018-04-24	02:00:00	54	R	in_cylinder	soil	0.1	14.7
2018-04-24	03:00:00	54	R	in_cylinder	soil	0.1	14.7
2018-04-24	04:00:00	54	R	in_cylinder	soil	0.1	14.7
2018-04-24	05:00:00	54	R	in_cylinder	soil	0.1	14.7
2018-04-24	06:00:00	54	R	in_cylinder	soil	0.1	14.2
2018-04-24	07:00:00	54	R	in_cylinder	soil	0.1	14.2
2018-04-24	08:00:00	54	R	in_cylinder	soil	0.1	14.2
2018-04-24	09:00:00	54	R	in_cylinder	soil	0.1	14.7
2018-04-24	10:00:00	54	R	in_cylinder	soil	0.1	15.7
2018-04-24	11:00:00	54	R	in_cylinder	soil	0.1	16.7
2018-04-24	12:00:00	54	R	in_cylinder	soil	0.1	17.2
2018-04-24	13:00:00	54	R	in_cylinder	soil	0.1	18.2
2018-04-24	14:00:00	54	R	in_cylinder	soil	0.1	18.7
2018-04-24	15:00:00	54	R	in_cylinder	soil	0.1	19.2
2018-04-24	16:00:00	54	R	in_cylinder	soil	0.1	19.2
2018-04-24	17:00:00	54	R	in_cylinder	soil	0.1	19.2
2018-04-24	18:00:00	54	R	in_cylinder	soil	0.1	18.7
2018-04-24	19:00:00	54	R	in_cylinder	soil	0.1	18.7
2018-04-24	20:00:00	54	R	in_cylinder	soil	0.1	17.7
2018-04-24	21:00:00	54	R	in_cylinder	soil	0.1	17.2
2018-04-24	22:00:00	54	R	in_cylinder	soil	0.1	16.7
2018-04-24	23:00:00	54	R	in_cylinder	soil	0.1	16.2
2018-04-25	00:00:00	54	R	in_cylinder	soil	0.1	15.7
2018-04-25	01:00:00	54	R	in_cylinder	soil	0.1	15.2
2018-04-25	02:00:00	54	R	in_cylinder	soil	0.1	14.7
2018-04-25	03:00:00	54	R	in_cylinder	soil	0.1	14.2
2018-04-25	04:00:00	54	R	in_cylinder	soil	0.1	14.2
2018-04-25	05:00:00	54	R	in_cylinder	soil	0.1	13.7
2018-04-25	06:00:00	54	R	in_cylinder	soil	0.1	13.7
2018-04-25	07:00:00	54	R	in_cylinder	soil	0.1	13.7
2018-04-25	08:00:00	54	R	in_cylinder	soil	0.1	13.7
2018-04-25	09:00:00	54	R	in_cylinder	soil	0.1	14.7
2018-04-25	10:00:00	54	R	in_cylinder	soil	0.1	15.2
2018-04-25	11:00:00	54	R	in_cylinder	soil	0.1	16.2
2018-04-25	12:00:00	54	R	in_cylinder	soil	0.1	17.2
2018-04-25	13:00:00	54	R	in_cylinder	soil	0.1	17.7
2018-04-25	14:00:00	54	R	in_cylinder	soil	0.1	19.2
2018-04-25	15:00:00	54	R	in_cylinder	soil	0.1	19.2
2018-04-25	16:00:00	54	R	in_cylinder	soil	0.1	19.2
2018-04-25	17:00:00	54	R	in_cylinder	soil	0.1	18.7
2018-04-25	18:00:00	54	R	in_cylinder	soil	0.1	18.7
2018-04-25	19:00:00	54	R	in_cylinder	soil	0.1	18.2
2018-04-25	20:00:00	54	R	in_cylinder	soil	0.1	17.7
2018-04-25	21:00:00	54	R	in_cylinder	soil	0.1	17.2
2018-04-25	22:00:00	54	R	in_cylinder	soil	0.1	16.7
2018-04-25	23:00:00	54	R	in_cylinder	soil	0.1	16.2
2018-04-26	00:00:00	54	R	in_cylinder	soil	0.1	15.7
2018-04-26	01:00:00	54	R	in_cylinder	soil	0.1	15.2
2018-04-26	02:00:00	54	R	in_cylinder	soil	0.1	15.2
2018-04-26	03:00:00	54	R	in_cylinder	soil	0.1	14.7
2018-04-26	04:00:00	54	R	in_cylinder	soil	0.1	14.7
2018-04-26	05:00:00	54	R	in_cylinder	soil	0.1	14.2
2018-04-26	06:00:00	54	R	in_cylinder	soil	0.1	14.2
2018-04-26	07:00:00	54	R	in_cylinder	soil	0.1	14.2
2018-04-26	08:00:00	54	R	in_cylinder	soil	0.1	14.2
2018-04-26	09:00:00	54	R	in_cylinder	soil	0.1	14.2
2018-04-26	10:00:00	54	R	in_cylinder	soil	0.1	14.2
2018-04-26	11:00:00	54	R	in_cylinder	soil	0.1	14.2
2018-04-26	12:00:00	54	R	in_cylinder	soil	0.1	14.7
2018-04-26	13:00:00	54	R	in_cylinder	soil	0.1	15.7
2018-04-26	14:00:00	54	R	in_cylinder	soil	0.1	16.7
2018-04-26	15:00:00	54	R	in_cylinder	soil	0.1	17.2
2018-04-26	16:00:00	54	R	in_cylinder	soil	0.1	17.2
2018-04-26	17:00:00	54	R	in_cylinder	soil	0.1	16.7
2018-04-26	18:00:00	54	R	in_cylinder	soil	0.1	16.7
2018-04-26	19:00:00	54	R	in_cylinder	soil	0.1	16.2
2018-04-26	20:00:00	54	R	in_cylinder	soil	0.1	15.7
2018-04-26	21:00:00	54	R	in_cylinder	soil	0.1	15.2
2018-04-26	22:00:00	54	R	in_cylinder	soil	0.1	14.7
2018-04-26	23:00:00	54	R	in_cylinder	soil	0.1	14.2
2018-04-27	00:00:00	54	R	in_cylinder	soil	0.1	14.2
2018-04-27	01:00:00	54	R	in_cylinder	soil	0.1	13.7
2018-04-27	02:00:00	54	R	in_cylinder	soil	0.1	13.2
2018-04-27	03:00:00	54	R	in_cylinder	soil	0.1	12.7
2018-04-27	04:00:00	54	R	in_cylinder	soil	0.1	12.2
2018-04-27	05:00:00	54	R	in_cylinder	soil	0.1	11.7
2018-04-27	06:00:00	54	R	in_cylinder	soil	0.1	11.7
2018-04-27	07:00:00	54	R	in_cylinder	soil	0.1	11.7
2018-04-27	08:00:00	54	R	in_cylinder	soil	0.1	11.7
2018-04-27	09:00:00	54	R	in_cylinder	soil	0.1	12.7
2018-04-27	10:00:00	54	R	in_cylinder	soil	0.1	13.7
2018-04-27	11:00:00	54	R	in_cylinder	soil	0.1	14.7
2018-04-27	12:00:00	54	R	in_cylinder	soil	0.1	15.2
2018-04-27	13:00:00	54	R	in_cylinder	soil	0.1	16.7
2018-04-27	14:00:00	54	R	in_cylinder	soil	0.1	18.2
2018-04-27	15:00:00	54	R	in_cylinder	soil	0.1	18.2
2018-04-27	16:00:00	54	R	in_cylinder	soil	0.1	18.2
2018-04-27	17:00:00	54	R	in_cylinder	soil	0.1	18.2
2018-04-27	18:00:00	54	R	in_cylinder	soil	0.1	18.2
2018-04-27	19:00:00	54	R	in_cylinder	soil	0.1	17.7
2018-04-27	20:00:00	54	R	in_cylinder	soil	0.1	17.2
2018-04-27	21:00:00	54	R	in_cylinder	soil	0.1	16.2
2018-04-27	22:00:00	54	R	in_cylinder	soil	0.1	15.7
2018-04-27	23:00:00	54	R	in_cylinder	soil	0.1	15.2
2018-04-28	00:00:00	54	R	in_cylinder	soil	0.1	14.7
2018-04-28	01:00:00	54	R	in_cylinder	soil	0.1	14.2
2018-04-28	02:00:00	54	R	in_cylinder	soil	0.1	14.2
2018-04-28	03:00:00	54	R	in_cylinder	soil	0.1	14.2
2018-04-28	04:00:00	54	R	in_cylinder	soil	0.1	13.7
2018-04-28	05:00:00	54	R	in_cylinder	soil	0.1	13.7
2018-04-28	06:00:00	54	R	in_cylinder	soil	0.1	13.7
2018-04-28	07:00:00	54	R	in_cylinder	soil	0.1	13.7
2018-04-28	08:00:00	54	R	in_cylinder	soil	0.1	13.7
2018-04-28	09:00:00	54	R	in_cylinder	soil	0.1	13.7
2018-04-28	10:00:00	54	R	in_cylinder	soil	0.1	14.2
2018-04-28	11:00:00	54	R	in_cylinder	soil	0.1	15.2
2018-04-28	12:00:00	54	R	in_cylinder	soil	0.1	15.7
2018-04-28	13:00:00	54	R	in_cylinder	soil	0.1	17.2
2018-04-28	14:00:00	54	R	in_cylinder	soil	0.1	18.2
2018-04-28	15:00:00	54	R	in_cylinder	soil	0.1	18.2
2018-04-28	16:00:00	54	R	in_cylinder	soil	0.1	18.2
2018-04-28	17:00:00	54	R	in_cylinder	soil	0.1	17.7
2018-04-28	18:00:00	54	R	in_cylinder	soil	0.1	17.7
2018-04-28	19:00:00	54	R	in_cylinder	soil	0.1	17.2
2018-04-28	20:00:00	54	R	in_cylinder	soil	0.1	16.7
2018-04-28	21:00:00	54	R	in_cylinder	soil	0.1	16.2
2018-04-28	22:00:00	54	R	in_cylinder	soil	0.1	16.2
2018-04-28	23:00:00	54	R	in_cylinder	soil	0.1	15.7
2018-04-29	00:00:00	54	R	in_cylinder	soil	0.1	15.2
2018-04-29	01:00:00	54	R	in_cylinder	soil	0.1	14.7
2018-04-29	02:00:00	54	R	in_cylinder	soil	0.1	14.7
2018-04-29	03:00:00	54	R	in_cylinder	soil	0.1	14.2
2018-04-29	04:00:00	54	R	in_cylinder	soil	0.1	13.7
2018-04-29	05:00:00	54	R	in_cylinder	soil	0.1	13.7
2018-04-29	06:00:00	54	R	in_cylinder	soil	0.1	13.2
2018-04-29	07:00:00	54	R	in_cylinder	soil	0.1	13.2
2018-04-29	08:00:00	54	R	in_cylinder	soil	0.1	13.7
2018-04-29	09:00:00	54	R	in_cylinder	soil	0.1	14.2
2018-04-29	10:00:00	54	R	in_cylinder	soil	0.1	15.2
2018-04-29	11:00:00	54	R	in_cylinder	soil	0.1	15.7
2018-04-29	12:00:00	54	R	in_cylinder	soil	0.1	16.7
2018-04-29	13:00:00	54	R	in_cylinder	soil	0.1	17.2
2018-04-29	14:00:00	54	R	in_cylinder	soil	0.1	18.2
2018-04-29	15:00:00	54	R	in_cylinder	soil	0.1	18.7
2018-04-29	16:00:00	54	R	in_cylinder	soil	0.1	18.7
2018-04-29	17:00:00	54	R	in_cylinder	soil	0.1	18.7
2018-04-29	18:00:00	54	R	in_cylinder	soil	0.1	18.2
2018-04-29	19:00:00	54	R	in_cylinder	soil	0.1	17.7
2018-04-29	20:00:00	54	R	in_cylinder	soil	0.1	17.7
2018-04-29	21:00:00	54	R	in_cylinder	soil	0.1	17.2
2018-04-29	22:00:00	54	R	in_cylinder	soil	0.1	16.7
2018-04-29	23:00:00	54	R	in_cylinder	soil	0.1	16.7
2018-04-30	00:00:00	54	R	in_cylinder	soil	0.1	16.2
2018-04-30	01:00:00	54	R	in_cylinder	soil	0.1	15.7
2018-04-30	02:00:00	54	R	in_cylinder	soil	0.1	15.2
2018-04-30	03:00:00	54	R	in_cylinder	soil	0.1	14.7
2018-04-30	04:00:00	54	R	in_cylinder	soil	0.1	14.2
2018-04-30	05:00:00	54	R	in_cylinder	soil	0.1	14.2
2018-04-30	06:00:00	54	R	in_cylinder	soil	0.1	13.7
2018-04-30	07:00:00	54	R	in_cylinder	soil	0.1	13.7
2018-04-30	08:00:00	54	R	in_cylinder	soil	0.1	14.2
2018-04-30	09:00:00	54	R	in_cylinder	soil	0.1	14.2
2018-04-30	10:00:00	54	R	in_cylinder	soil	0.1	14.7
2018-04-30	11:00:00	54	R	in_cylinder	soil	0.1	15.2
2018-04-30	12:00:00	54	R	in_cylinder	soil	0.1	15.7
2018-04-30	13:00:00	54	R	in_cylinder	soil	0.1	16.7
2018-04-30	14:00:00	54	R	in_cylinder	soil	0.1	17.7
2018-04-30	15:00:00	54	R	in_cylinder	soil	0.1	17.7
2018-04-30	16:00:00	54	R	in_cylinder	soil	0.1	17.2
2018-04-30	17:00:00	54	R	in_cylinder	soil	0.1	17.2
2018-04-30	18:00:00	54	R	in_cylinder	soil	0.1	16.7
2018-04-30	19:00:00	54	R	in_cylinder	soil	0.1	16.2
2018-04-30	20:00:00	54	R	in_cylinder	soil	0.1	15.7
2018-04-30	21:00:00	54	R	in_cylinder	soil	0.1	15.2
2018-04-30	22:00:00	54	R	in_cylinder	soil	0.1	14.7
2018-04-30	23:00:00	54	R	in_cylinder	soil	0.1	14.7
2018-05-01	00:00:00	54	R	in_cylinder	soil	0.1	14.2
2018-05-01	01:00:00	54	R	in_cylinder	soil	0.1	14.2
2018-05-01	02:00:00	54	R	in_cylinder	soil	0.1	13.7
2018-05-01	03:00:00	54	R	in_cylinder	soil	0.1	13.7
2018-05-01	04:00:00	54	R	in_cylinder	soil	0.1	13.2
2018-05-01	05:00:00	54	R	in_cylinder	soil	0.1	13.2
2018-05-01	06:00:00	54	R	in_cylinder	soil	0.1	13.2
2018-05-01	07:00:00	54	R	in_cylinder	soil	0.1	13.2
2018-05-01	08:00:00	54	R	in_cylinder	soil	0.1	12.7
2018-05-01	09:00:00	54	R	in_cylinder	soil	0.1	12.7
2018-05-01	10:00:00	54	R	in_cylinder	soil	0.1	12.7
2018-05-01	11:00:00	54	R	in_cylinder	soil	0.1	13.2
2018-05-01	12:00:00	54	R	in_cylinder	soil	0.1	13.2
2018-05-01	13:00:00	54	R	in_cylinder	soil	0.1	14.2
2018-05-01	14:00:00	54	R	in_cylinder	soil	0.1	14.7
2018-05-01	15:00:00	54	R	in_cylinder	soil	0.1	15.2
2018-05-01	16:00:00	54	R	in_cylinder	soil	0.1	15.2
2018-05-01	17:00:00	54	R	in_cylinder	soil	0.1	15.2
2018-05-01	18:00:00	54	R	in_cylinder	soil	0.1	15.2
2018-05-01	19:00:00	54	R	in_cylinder	soil	0.1	15.2
2018-05-01	20:00:00	54	R	in_cylinder	soil	0.1	14.7
2018-05-01	21:00:00	54	R	in_cylinder	soil	0.1	14.2
2018-05-01	22:00:00	54	R	in_cylinder	soil	0.1	13.7
2018-05-01	23:00:00	54	R	in_cylinder	soil	0.1	13.2
2018-05-02	00:00:00	54	R	in_cylinder	soil	0.1	13.2
2018-05-02	01:00:00	54	R	in_cylinder	soil	0.1	12.7
2018-05-02	02:00:00	54	R	in_cylinder	soil	0.1	12.7
2018-05-02	03:00:00	54	R	in_cylinder	soil	0.1	12.7
2018-05-02	04:00:00	54	R	in_cylinder	soil	0.1	12.2
2018-05-02	05:00:00	54	R	in_cylinder	soil	0.1	12.2
2018-05-02	06:00:00	54	R	in_cylinder	soil	0.1	12.2
2018-05-02	07:00:00	54	R	in_cylinder	soil	0.1	12.2
2018-05-02	08:00:00	54	R	in_cylinder	soil	0.1	12.2
2018-05-02	09:00:00	54	R	in_cylinder	soil	0.1	12.2
2018-05-02	10:00:00	54	R	in_cylinder	soil	0.1	12.7
2018-05-02	11:00:00	54	R	in_cylinder	soil	0.1	12.7
2018-05-02	12:00:00	54	R	in_cylinder	soil	0.1	13.2
2018-05-02	13:00:00	54	R	in_cylinder	soil	0.1	13.7
2018-05-02	14:00:00	54	R	in_cylinder	soil	0.1	14.2
2018-05-02	15:00:00	54	R	in_cylinder	soil	0.1	15.2
2018-05-02	16:00:00	54	R	in_cylinder	soil	0.1	15.2
2018-05-02	17:00:00	54	R	in_cylinder	soil	0.1	15.7
2018-05-02	18:00:00	54	R	in_cylinder	soil	0.1	15.2
2018-05-02	19:00:00	54	R	in_cylinder	soil	0.1	14.7
2018-05-02	20:00:00	54	R	in_cylinder	soil	0.1	14.7
2018-05-02	21:00:00	54	R	in_cylinder	soil	0.1	14.2
2018-05-02	22:00:00	54	R	in_cylinder	soil	0.1	14.2
2018-05-02	23:00:00	54	R	in_cylinder	soil	0.1	13.7
2018-05-03	00:00:00	54	R	in_cylinder	soil	0.1	13.7
2018-05-03	01:00:00	54	R	in_cylinder	soil	0.1	13.7
2018-05-03	02:00:00	54	R	in_cylinder	soil	0.1	13.2
2018-05-03	03:00:00	54	R	in_cylinder	soil	0.1	13.2
2018-05-03	04:00:00	54	R	in_cylinder	soil	0.1	13.2
2018-05-03	05:00:00	54	R	in_cylinder	soil	0.1	13.2
2018-05-03	06:00:00	54	R	in_cylinder	soil	0.1	12.7
2018-05-03	07:00:00	54	R	in_cylinder	soil	0.1	12.7
2018-05-03	08:00:00	54	R	in_cylinder	soil	0.1	12.7
2018-05-03	09:00:00	54	R	in_cylinder	soil	0.1	12.7
2018-05-03	10:00:00	54	R	in_cylinder	soil	0.1	12.7
2018-05-03	11:00:00	54	R	in_cylinder	soil	0.1	12.7
2018-05-03	12:00:00	54	R	in_cylinder	soil	0.1	13.2
2018-05-03	13:00:00	54	R	in_cylinder	soil	0.1	13.2
2018-05-03	14:00:00	54	R	in_cylinder	soil	0.1	13.2
2018-05-03	15:00:00	54	R	in_cylinder	soil	0.1	13.2
2018-05-03	16:00:00	54	R	in_cylinder	soil	0.1	13.7
2018-05-03	17:00:00	54	R	in_cylinder	soil	0.1	13.7
2018-05-03	18:00:00	54	R	in_cylinder	soil	0.1	13.7
2018-05-03	19:00:00	54	R	in_cylinder	soil	0.1	13.7
2018-05-03	20:00:00	54	R	in_cylinder	soil	0.1	13.7
2018-05-03	21:00:00	54	R	in_cylinder	soil	0.1	13.2
2018-05-03	22:00:00	54	R	in_cylinder	soil	0.1	13.2
2018-05-03	23:00:00	54	R	in_cylinder	soil	0.1	13.2
2018-05-04	00:00:00	54	R	in_cylinder	soil	0.1	13.2
2018-05-04	01:00:00	54	R	in_cylinder	soil	0.1	13.2
2018-05-04	02:00:00	54	R	in_cylinder	soil	0.1	13.2
2018-05-04	03:00:00	54	R	in_cylinder	soil	0.1	13.2
2018-05-04	04:00:00	54	R	in_cylinder	soil	0.1	13.2
2018-05-04	05:00:00	54	R	in_cylinder	soil	0.1	12.7
2018-05-04	06:00:00	54	R	in_cylinder	soil	0.1	12.7
2018-05-04	07:00:00	54	R	in_cylinder	soil	0.1	12.7
2018-05-04	08:00:00	54	R	in_cylinder	soil	0.1	12.7
2018-05-04	09:00:00	54	R	in_cylinder	soil	0.1	12.7
2018-05-04	10:00:00	54	R	in_cylinder	soil	0.1	13.2
2018-05-04	11:00:00	54	R	in_cylinder	soil	0.1	13.7
2018-05-04	12:00:00	54	R	in_cylinder	soil	0.1	14.2
2018-05-04	13:00:00	54	R	in_cylinder	soil	0.1	14.2
2018-05-04	14:00:00	54	R	in_cylinder	soil	0.1	14.7
2018-05-04	15:00:00	54	R	in_cylinder	soil	0.1	14.7
2018-05-04	16:00:00	54	R	in_cylinder	soil	0.1	14.7
2018-05-04	17:00:00	54	R	in_cylinder	soil	0.1	15.2
2018-05-04	18:00:00	54	R	in_cylinder	soil	0.1	15.2
2018-05-04	19:00:00	54	R	in_cylinder	soil	0.1	15.2
2018-05-04	20:00:00	54	R	in_cylinder	soil	0.1	14.7
2018-05-04	21:00:00	54	R	in_cylinder	soil	0.1	14.7
2018-05-04	22:00:00	54	R	in_cylinder	soil	0.1	14.7
2018-05-04	23:00:00	54	R	in_cylinder	soil	0.1	14.7
2018-05-05	00:00:00	54	R	in_cylinder	soil	0.1	14.7
2018-05-05	01:00:00	54	R	in_cylinder	soil	0.1	14.2
2018-05-05	02:00:00	54	R	in_cylinder	soil	0.1	14.2
2018-05-05	03:00:00	54	R	in_cylinder	soil	0.1	14.2
2018-05-05	04:00:00	54	R	in_cylinder	soil	0.1	13.7
2018-05-05	05:00:00	54	R	in_cylinder	soil	0.1	13.7
2018-05-05	06:00:00	54	R	in_cylinder	soil	0.1	13.7
2018-05-05	07:00:00	54	R	in_cylinder	soil	0.1	13.7
2018-05-05	08:00:00	54	R	in_cylinder	soil	0.1	13.7
2018-05-05	09:00:00	54	R	in_cylinder	soil	0.1	13.7
2018-05-05	10:00:00	54	R	in_cylinder	soil	0.1	14.2
2018-05-05	11:00:00	54	R	in_cylinder	soil	0.1	14.7
2018-05-05	12:00:00	54	R	in_cylinder	soil	0.1	15.7
2018-05-05	13:00:00	54	R	in_cylinder	soil	0.1	16.7
2018-05-05	14:00:00	54	R	in_cylinder	soil	0.1	17.7
2018-05-05	15:00:00	54	R	in_cylinder	soil	0.1	18.2
2018-05-05	16:00:00	54	R	in_cylinder	soil	0.1	18.2
2018-05-05	17:00:00	54	R	in_cylinder	soil	0.1	18.2
2018-05-05	18:00:00	54	R	in_cylinder	soil	0.1	18.2
2018-05-05	19:00:00	54	R	in_cylinder	soil	0.1	18.2
2018-05-05	20:00:00	54	R	in_cylinder	soil	0.1	17.7
2018-05-05	21:00:00	54	R	in_cylinder	soil	0.1	17.2
2018-05-05	22:00:00	54	R	in_cylinder	soil	0.1	17.2
2018-05-05	23:00:00	54	R	in_cylinder	soil	0.1	16.7
2018-05-06	00:00:00	54	R	in_cylinder	soil	0.1	16.2
2018-05-06	01:00:00	54	R	in_cylinder	soil	0.1	15.7
2018-05-06	02:00:00	54	R	in_cylinder	soil	0.1	15.7
2018-05-06	03:00:00	54	R	in_cylinder	soil	0.1	15.2
2018-05-06	04:00:00	54	R	in_cylinder	soil	0.1	14.7
2018-05-06	05:00:00	54	R	in_cylinder	soil	0.1	14.7
2018-05-06	06:00:00	54	R	in_cylinder	soil	0.1	14.2
2018-05-06	07:00:00	54	R	in_cylinder	soil	0.1	14.2
2018-05-06	08:00:00	54	R	in_cylinder	soil	0.1	14.7
2018-05-06	09:00:00	54	R	in_cylinder	soil	0.1	15.2
2018-05-06	10:00:00	54	R	in_cylinder	soil	0.1	16.2
2018-05-06	11:00:00	54	R	in_cylinder	soil	0.1	16.7
2018-05-06	12:00:00	54	R	in_cylinder	soil	0.1	17.7
2018-05-06	13:00:00	54	R	in_cylinder	soil	0.1	18.2
2018-05-06	14:00:00	54	R	in_cylinder	soil	0.1	19.2
2018-05-06	15:00:00	54	R	in_cylinder	soil	0.1	19.7
2018-05-06	16:00:00	54	R	in_cylinder	soil	0.1	19.7
2018-05-06	17:00:00	54	R	in_cylinder	soil	0.1	19.7
2018-05-06	18:00:00	54	R	in_cylinder	soil	0.1	19.7
2018-05-06	19:00:00	54	R	in_cylinder	soil	0.1	19.2
2018-05-06	20:00:00	54	R	in_cylinder	soil	0.1	18.7
2018-05-06	21:00:00	54	R	in_cylinder	soil	0.1	18.7
2018-05-06	22:00:00	54	R	in_cylinder	soil	0.1	17.7
2018-05-06	23:00:00	54	R	in_cylinder	soil	0.1	17.2
2018-05-07	00:00:00	54	R	in_cylinder	soil	0.1	16.7
2018-05-07	01:00:00	54	R	in_cylinder	soil	0.1	16.2
2018-05-07	02:00:00	54	R	in_cylinder	soil	0.1	15.7
2018-05-07	03:00:00	54	R	in_cylinder	soil	0.1	15.2
2018-05-07	04:00:00	54	R	in_cylinder	soil	0.1	14.7
2018-05-07	05:00:00	54	R	in_cylinder	soil	0.1	14.2
2018-05-07	06:00:00	54	R	in_cylinder	soil	0.1	14.2
2018-05-07	07:00:00	54	R	in_cylinder	soil	0.1	14.2
2018-05-07	08:00:00	54	R	in_cylinder	soil	0.1	14.2
2018-05-07	09:00:00	54	R	in_cylinder	soil	0.1	14.7
2018-05-07	10:00:00	54	R	in_cylinder	soil	0.1	15.7
2018-05-07	11:00:00	54	R	in_cylinder	soil	0.1	16.7
2018-05-07	12:00:00	54	R	in_cylinder	soil	0.1	17.7
2018-05-07	13:00:00	54	R	in_cylinder	soil	0.1	18.2
2018-05-07	14:00:00	54	R	in_cylinder	soil	0.1	19.2
2018-05-07	15:00:00	54	R	in_cylinder	soil	0.1	19.7
2018-05-07	16:00:00	54	R	in_cylinder	soil	0.1	19.7
2018-05-07	17:00:00	54	R	in_cylinder	soil	0.1	19.7
2018-05-07	18:00:00	54	R	in_cylinder	soil	0.1	19.7
2018-05-07	19:00:00	54	R	in_cylinder	soil	0.1	19.2
2018-05-07	20:00:00	54	R	in_cylinder	soil	0.1	18.7
2018-05-07	21:00:00	54	R	in_cylinder	soil	0.1	18.2
2018-05-07	22:00:00	54	R	in_cylinder	soil	0.1	17.7
2018-05-07	23:00:00	54	R	in_cylinder	soil	0.1	17.2
2018-05-08	00:00:00	54	R	in_cylinder	soil	0.1	16.7
2018-05-08	01:00:00	54	R	in_cylinder	soil	0.1	16.2
2018-05-08	02:00:00	54	R	in_cylinder	soil	0.1	15.7
2018-05-08	03:00:00	54	R	in_cylinder	soil	0.1	15.2
2018-05-08	04:00:00	54	R	in_cylinder	soil	0.1	15.2
2018-05-08	05:00:00	54	R	in_cylinder	soil	0.1	14.7
2018-05-08	06:00:00	54	R	in_cylinder	soil	0.1	14.7
2018-05-08	07:00:00	54	R	in_cylinder	soil	0.1	14.2
2018-05-08	08:00:00	54	R	in_cylinder	soil	0.1	14.7
2018-05-08	09:00:00	54	R	in_cylinder	soil	0.1	15.2
2018-05-08	10:00:00	54	R	in_cylinder	soil	0.1	16.2
2018-05-08	11:00:00	54	R	in_cylinder	soil	0.1	17.2
2018-05-08	12:00:00	54	R	in_cylinder	soil	0.1	18.2
2018-05-08	13:00:00	54	R	in_cylinder	soil	0.1	18.7
2018-05-08	14:00:00	54	R	in_cylinder	soil	0.1	19.7
2018-05-08	15:00:00	54	R	in_cylinder	soil	0.1	20.2
2018-05-08	16:00:00	54	R	in_cylinder	soil	0.1	20.2
2018-05-08	17:00:00	54	R	in_cylinder	soil	0.1	20.2
2018-05-08	18:00:00	54	R	in_cylinder	soil	0.1	19.7
2018-05-08	19:00:00	54	R	in_cylinder	soil	0.1	19.7
2018-05-08	20:00:00	54	R	in_cylinder	soil	0.1	19.2
2018-05-08	21:00:00	54	R	in_cylinder	soil	0.1	18.7
2018-05-08	22:00:00	54	R	in_cylinder	soil	0.1	18.2
2018-05-08	23:00:00	54	R	in_cylinder	soil	0.1	18.2
2018-05-09	00:00:00	54	R	in_cylinder	soil	0.1	17.7
2018-05-09	01:00:00	54	R	in_cylinder	soil	0.1	17.2
2018-05-09	02:00:00	54	R	in_cylinder	soil	0.1	16.7
2018-05-09	03:00:00	54	R	in_cylinder	soil	0.1	16.2
2018-05-09	04:00:00	54	R	in_cylinder	soil	0.1	15.7
2018-05-09	05:00:00	54	R	in_cylinder	soil	0.1	15.2
2018-05-09	06:00:00	54	R	in_cylinder	soil	0.1	15.2
2018-05-09	07:00:00	54	R	in_cylinder	soil	0.1	15.2
2018-05-09	08:00:00	54	R	in_cylinder	soil	0.1	15.7
2018-05-09	09:00:00	54	R	in_cylinder	soil	0.1	16.2
2018-05-09	10:00:00	54	R	in_cylinder	soil	0.1	17.2
2018-05-09	11:00:00	54	R	in_cylinder	soil	0.1	17.7
2018-05-09	12:00:00	54	R	in_cylinder	soil	0.1	18.7
2018-05-09	13:00:00	54	R	in_cylinder	soil	0.1	18.7
2018-05-09	14:00:00	54	R	in_cylinder	soil	0.1	18.7
2018-05-09	15:00:00	54	R	in_cylinder	soil	0.1	18.2
2018-05-09	16:00:00	54	R	in_cylinder	soil	0.1	18.2
2018-05-09	17:00:00	54	R	in_cylinder	soil	0.1	18.7
2018-05-09	18:00:00	54	R	in_cylinder	soil	0.1	18.7
2018-05-09	19:00:00	54	R	in_cylinder	soil	0.1	18.7
2018-05-09	20:00:00	54	R	in_cylinder	soil	0.1	18.2
2018-05-09	21:00:00	54	R	in_cylinder	soil	0.1	18.2
2018-05-09	22:00:00	54	R	in_cylinder	soil	0.1	17.7
2018-05-09	23:00:00	54	R	in_cylinder	soil	0.1	17.2
2018-05-10	00:00:00	54	R	in_cylinder	soil	0.1	16.7
2018-05-10	01:00:00	54	R	in_cylinder	soil	0.1	16.7
2018-05-10	02:00:00	54	R	in_cylinder	soil	0.1	16.2
2018-05-10	03:00:00	54	R	in_cylinder	soil	0.1	16.2
2018-05-10	04:00:00	54	R	in_cylinder	soil	0.1	15.7
2018-05-10	05:00:00	54	R	in_cylinder	soil	0.1	15.7
2018-05-10	06:00:00	54	R	in_cylinder	soil	0.1	15.7
2018-05-10	07:00:00	54	R	in_cylinder	soil	0.1	15.7
2018-05-10	08:00:00	54	R	in_cylinder	soil	0.1	15.2
2018-05-10	09:00:00	54	R	in_cylinder	soil	0.1	15.2
2018-05-10	10:00:00	54	R	in_cylinder	soil	0.1	15.7
2018-05-10	11:00:00	54	R	in_cylinder	soil	0.1	15.7
2018-05-10	12:00:00	54	R	in_cylinder	soil	0.1	15.7
2018-05-10	13:00:00	54	R	in_cylinder	soil	0.1	15.7
2018-05-10	14:00:00	54	R	in_cylinder	soil	0.1	15.2
2018-05-10	15:00:00	54	R	in_cylinder	soil	0.1	15.2
2018-05-10	16:00:00	54	R	in_cylinder	soil	0.1	14.7
2018-05-10	17:00:00	54	R	in_cylinder	soil	0.1	14.7
2018-05-10	18:00:00	54	R	in_cylinder	soil	0.1	15.2
2018-05-10	19:00:00	54	R	in_cylinder	soil	0.1	15.2
2018-05-10	20:00:00	54	R	in_cylinder	soil	0.1	14.7
2018-05-10	21:00:00	54	R	in_cylinder	soil	0.1	14.7
2018-05-10	22:00:00	54	R	in_cylinder	soil	0.1	14.7
2018-05-10	23:00:00	54	R	in_cylinder	soil	0.1	14.7
2018-05-11	00:00:00	54	R	in_cylinder	soil	0.1	14.2
2018-05-11	01:00:00	54	R	in_cylinder	soil	0.1	14.2
2018-05-11	02:00:00	54	R	in_cylinder	soil	0.1	14.2
2018-05-11	03:00:00	54	R	in_cylinder	soil	0.1	14.2
2018-05-11	04:00:00	54	R	in_cylinder	soil	0.1	13.7
2018-05-11	05:00:00	54	R	in_cylinder	soil	0.1	13.7
2018-05-11	06:00:00	54	R	in_cylinder	soil	0.1	13.2
2018-05-11	07:00:00	54	R	in_cylinder	soil	0.1	13.2
2018-05-11	08:00:00	54	R	in_cylinder	soil	0.1	13.7
2018-05-11	09:00:00	54	R	in_cylinder	soil	0.1	13.7
2018-05-11	10:00:00	54	R	in_cylinder	soil	0.1	14.2
2018-05-11	11:00:00	54	R	in_cylinder	soil	0.1	15.2
2018-05-11	12:00:00	54	R	in_cylinder	soil	0.1	15.7
2018-05-11	13:00:00	54	R	in_cylinder	soil	0.1	16.7
2018-05-11	14:00:00	54	R	in_cylinder	soil	0.1	17.2
2018-05-11	15:00:00	54	R	in_cylinder	soil	0.1	17.7
2018-05-11	16:00:00	54	R	in_cylinder	soil	0.1	18.2
2018-05-11	17:00:00	54	R	in_cylinder	soil	0.1	18.2
2018-05-11	18:00:00	54	R	in_cylinder	soil	0.1	18.2
2018-05-11	19:00:00	54	R	in_cylinder	soil	0.1	17.7
2018-05-11	20:00:00	54	R	in_cylinder	soil	0.1	17.7
2018-05-11	21:00:00	54	R	in_cylinder	soil	0.1	17.2
2018-05-11	22:00:00	54	R	in_cylinder	soil	0.1	16.7
2018-05-11	23:00:00	54	R	in_cylinder	soil	0.1	16.2
2018-05-12	00:00:00	54	R	in_cylinder	soil	0.1	16.2
2018-05-12	01:00:00	54	R	in_cylinder	soil	0.1	15.7
2018-05-12	02:00:00	54	R	in_cylinder	soil	0.1	15.2
2018-05-12	03:00:00	54	R	in_cylinder	soil	0.1	15.2
2018-05-12	04:00:00	54	R	in_cylinder	soil	0.1	14.7
2018-05-12	05:00:00	54	R	in_cylinder	soil	0.1	14.2
2018-05-12	06:00:00	54	R	in_cylinder	soil	0.1	14.2
2018-05-12	07:00:00	54	R	in_cylinder	soil	0.1	14.2
2018-05-12	08:00:00	54	R	in_cylinder	soil	0.1	14.7
2018-05-12	09:00:00	54	R	in_cylinder	soil	0.1	15.2
2018-05-12	10:00:00	54	R	in_cylinder	soil	0.1	16.2
2018-05-12	11:00:00	54	R	in_cylinder	soil	0.1	17.2
2018-05-12	12:00:00	54	R	in_cylinder	soil	0.1	17.7
2018-05-12	13:00:00	54	R	in_cylinder	soil	0.1	18.7
2018-05-12	14:00:00	54	R	in_cylinder	soil	0.1	19.2
2018-05-12	15:00:00	54	R	in_cylinder	soil	0.1	19.2
2018-05-12	16:00:00	54	R	in_cylinder	soil	0.1	19.7
2018-05-12	17:00:00	54	R	in_cylinder	soil	0.1	19.7
2018-05-12	18:00:00	54	R	in_cylinder	soil	0.1	19.7
2018-05-12	19:00:00	54	R	in_cylinder	soil	0.1	19.2
2018-05-12	20:00:00	54	R	in_cylinder	soil	0.1	18.7
2018-05-12	21:00:00	54	R	in_cylinder	soil	0.1	18.2
2018-05-12	22:00:00	54	R	in_cylinder	soil	0.1	17.7
2018-05-12	23:00:00	54	R	in_cylinder	soil	0.1	17.7
2018-05-13	00:00:00	54	R	in_cylinder	soil	0.1	17.2
2018-05-13	01:00:00	54	R	in_cylinder	soil	0.1	16.7
2018-05-13	02:00:00	54	R	in_cylinder	soil	0.1	16.2
2018-05-13	03:00:00	54	R	in_cylinder	soil	0.1	16.2
2018-05-13	04:00:00	54	R	in_cylinder	soil	0.1	15.7
2018-05-13	05:00:00	54	R	in_cylinder	soil	0.1	15.7
2018-05-13	06:00:00	54	R	in_cylinder	soil	0.1	15.2
2018-05-13	07:00:00	54	R	in_cylinder	soil	0.1	14.7
2018-05-13	08:00:00	54	R	in_cylinder	soil	0.1	14.7
2018-05-13	09:00:00	54	R	in_cylinder	soil	0.1	14.7
2018-05-13	10:00:00	54	R	in_cylinder	soil	0.1	14.2
2018-05-13	11:00:00	54	R	in_cylinder	soil	0.1	14.2
2018-05-13	12:00:00	54	R	in_cylinder	soil	0.1	13.7
2018-05-13	13:00:00	54	R	in_cylinder	soil	0.1	13.7
2018-05-13	14:00:00	54	R	in_cylinder	soil	0.1	13.7
2018-05-13	15:00:00	54	R	in_cylinder	soil	0.1	13.7
2018-05-13	16:00:00	54	R	in_cylinder	soil	0.1	13.7
2018-05-13	17:00:00	54	R	in_cylinder	soil	0.1	13.7
2018-05-13	18:00:00	54	R	in_cylinder	soil	0.1	13.2
2018-05-13	19:00:00	54	R	in_cylinder	soil	0.1	13.2
2018-05-13	20:00:00	54	R	in_cylinder	soil	0.1	13.2
2018-05-13	21:00:00	54	R	in_cylinder	soil	0.1	13.2
2018-05-13	22:00:00	54	R	in_cylinder	soil	0.1	13.2
2018-05-13	23:00:00	54	R	in_cylinder	soil	0.1	12.7
2018-05-14	00:00:00	54	R	in_cylinder	soil	0.1	12.7
2018-05-14	01:00:00	54	R	in_cylinder	soil	0.1	12.7
2018-05-14	02:00:00	54	R	in_cylinder	soil	0.1	12.7
2018-05-14	03:00:00	54	R	in_cylinder	soil	0.1	12.7
2018-05-14	04:00:00	54	R	in_cylinder	soil	0.1	12.7
2018-05-14	05:00:00	54	R	in_cylinder	soil	0.1	12.7
2018-05-14	06:00:00	54	R	in_cylinder	soil	0.1	12.7
2018-05-14	07:00:00	54	R	in_cylinder	soil	0.1	12.7
2018-05-14	08:00:00	54	R	in_cylinder	soil	0.1	12.7
2018-05-14	09:00:00	54	R	in_cylinder	soil	0.1	12.7
2018-05-14	10:00:00	54	R	in_cylinder	soil	0.1	13.2
2018-05-14	11:00:00	54	R	in_cylinder	soil	0.1	13.2
2018-05-14	12:00:00	54	R	in_cylinder	soil	0.1	13.2
2018-05-14	13:00:00	54	R	in_cylinder	soil	0.1	13.7
2018-05-14	14:00:00	54	R	in_cylinder	soil	0.1	13.7
2018-05-14	15:00:00	54	R	in_cylinder	soil	0.1	14.2
2018-05-14	16:00:00	54	R	in_cylinder	soil	0.1	14.2
2018-05-14	17:00:00	54	R	in_cylinder	soil	0.1	14.2
2018-05-14	18:00:00	54	R	in_cylinder	soil	0.1	14.2
2018-05-14	19:00:00	54	R	in_cylinder	soil	0.1	13.7
2018-05-14	20:00:00	54	R	in_cylinder	soil	0.1	13.7
2018-05-14	21:00:00	54	R	in_cylinder	soil	0.1	13.7
2018-05-14	22:00:00	54	R	in_cylinder	soil	0.1	13.7
2018-05-14	23:00:00	54	R	in_cylinder	soil	0.1	13.2
2018-05-15	00:00:00	54	R	in_cylinder	soil	0.1	13.2
2018-05-15	01:00:00	54	R	in_cylinder	soil	0.1	13.2
2018-05-15	02:00:00	54	R	in_cylinder	soil	0.1	13.2
2018-05-15	03:00:00	54	R	in_cylinder	soil	0.1	13.2
2018-05-15	04:00:00	54	R	in_cylinder	soil	0.1	13.2
2018-05-15	05:00:00	54	R	in_cylinder	soil	0.1	13.2
2018-05-15	06:00:00	54	R	in_cylinder	soil	0.1	13.2
2018-05-15	07:00:00	54	R	in_cylinder	soil	0.1	13.2
2018-05-15	08:00:00	54	R	in_cylinder	soil	0.1	13.2
2018-05-15	09:00:00	54	R	in_cylinder	soil	0.1	13.7
2018-05-15	10:00:00	54	R	in_cylinder	soil	0.1	13.7
2018-05-15	11:00:00	54	R	in_cylinder	soil	0.1	14.2
2018-05-15	12:00:00	54	R	in_cylinder	soil	0.1	14.2
2018-05-15	13:00:00	54	R	in_cylinder	soil	0.1	14.2
2018-05-15	14:00:00	54	R	in_cylinder	soil	0.1	14.7
2018-05-15	15:00:00	54	R	in_cylinder	soil	0.1	14.7
2018-05-15	16:00:00	54	R	in_cylinder	soil	0.1	14.7
2018-05-15	17:00:00	54	R	in_cylinder	soil	0.1	14.7
2018-05-15	18:00:00	54	R	in_cylinder	soil	0.1	14.2
2018-05-15	19:00:00	54	R	in_cylinder	soil	0.1	14.2
2018-05-15	20:00:00	54	R	in_cylinder	soil	0.1	14.2
2018-05-15	21:00:00	54	R	in_cylinder	soil	0.1	13.7
2018-05-15	22:00:00	54	R	in_cylinder	soil	0.1	13.7
2018-05-15	23:00:00	54	R	in_cylinder	soil	0.1	13.7
2018-05-16	00:00:00	54	R	in_cylinder	soil	0.1	13.7
2018-05-16	01:00:00	54	R	in_cylinder	soil	0.1	13.2
2018-05-16	02:00:00	54	R	in_cylinder	soil	0.1	13.2
2018-05-16	03:00:00	54	R	in_cylinder	soil	0.1	13.2
2018-05-16	04:00:00	54	R	in_cylinder	soil	0.1	12.7
2018-05-16	05:00:00	54	R	in_cylinder	soil	0.1	12.7
2018-05-16	06:00:00	54	R	in_cylinder	soil	0.1	12.7
2018-05-16	07:00:00	54	R	in_cylinder	soil	0.1	12.7
2018-05-16	08:00:00	54	R	in_cylinder	soil	0.1	12.7
2018-05-16	09:00:00	54	R	in_cylinder	soil	0.1	12.7
2018-05-16	10:00:00	54	R	in_cylinder	soil	0.1	13.2
2018-05-16	11:00:00	54	R	in_cylinder	soil	0.1	13.2
2018-05-16	12:00:00	54	R	in_cylinder	soil	0.1	13.2
2018-05-16	13:00:00	54	R	in_cylinder	soil	0.1	13.2
2018-05-16	14:00:00	54	R	in_cylinder	soil	0.1	13.7
2018-05-16	15:00:00	54	R	in_cylinder	soil	0.1	14.2
2018-05-16	16:00:00	54	R	in_cylinder	soil	0.1	14.2
2018-05-16	17:00:00	54	R	in_cylinder	soil	0.1	14.7
2018-05-16	18:00:00	54	R	in_cylinder	soil	0.1	14.2
2018-05-16	19:00:00	54	R	in_cylinder	soil	0.1	14.2
2018-05-16	20:00:00	54	R	in_cylinder	soil	0.1	14.2
2018-05-16	21:00:00	54	R	in_cylinder	soil	0.1	13.7
2018-05-16	22:00:00	54	R	in_cylinder	soil	0.1	13.7
2018-05-16	23:00:00	54	R	in_cylinder	soil	0.1	13.2
2018-05-17	00:00:00	54	R	in_cylinder	soil	0.1	13.2
2018-05-17	01:00:00	54	R	in_cylinder	soil	0.1	13.2
2018-05-17	02:00:00	54	R	in_cylinder	soil	0.1	12.7
2018-05-17	03:00:00	54	R	in_cylinder	soil	0.1	12.7
2018-05-17	04:00:00	54	R	in_cylinder	soil	0.1	12.2
2018-05-17	05:00:00	54	R	in_cylinder	soil	0.1	12.2
2018-05-17	06:00:00	54	R	in_cylinder	soil	0.1	12.2
2018-05-17	07:00:00	54	R	in_cylinder	soil	0.1	12.2
2018-05-17	08:00:00	54	R	in_cylinder	soil	0.1	12.2
2018-05-17	09:00:00	54	R	in_cylinder	soil	0.1	12.7
2018-05-17	10:00:00	54	R	in_cylinder	soil	0.1	12.7
2018-05-17	11:00:00	54	R	in_cylinder	soil	0.1	13.2
2018-05-17	12:00:00	54	R	in_cylinder	soil	0.1	13.7
2018-05-17	13:00:00	54	R	in_cylinder	soil	0.1	14.2
2018-05-17	14:00:00	54	R	in_cylinder	soil	0.1	14.2
2018-05-17	15:00:00	54	R	in_cylinder	soil	0.1	14.7
2018-05-17	16:00:00	54	R	in_cylinder	soil	0.1	15.2
2018-05-17	17:00:00	54	R	in_cylinder	soil	0.1	15.2
2018-05-17	18:00:00	54	R	in_cylinder	soil	0.1	15.2
2018-05-17	19:00:00	54	R	in_cylinder	soil	0.1	14.7
2018-05-17	20:00:00	54	R	in_cylinder	soil	0.1	14.7
2018-05-17	21:00:00	54	R	in_cylinder	soil	0.1	14.2
2018-05-17	22:00:00	54	R	in_cylinder	soil	0.1	14.2
2018-05-17	23:00:00	54	R	in_cylinder	soil	0.1	13.7
2018-05-18	00:00:00	54	R	in_cylinder	soil	0.1	13.2
2018-05-18	01:00:00	54	R	in_cylinder	soil	0.1	13.2
2018-05-18	02:00:00	54	R	in_cylinder	soil	0.1	13.2
2018-05-18	03:00:00	54	R	in_cylinder	soil	0.1	13.2
2018-05-18	04:00:00	54	R	in_cylinder	soil	0.1	12.7
2018-05-18	05:00:00	54	R	in_cylinder	soil	0.1	12.7
2018-05-18	06:00:00	54	R	in_cylinder	soil	0.1	12.7
2018-05-18	07:00:00	54	R	in_cylinder	soil	0.1	12.7
2018-05-18	08:00:00	54	R	in_cylinder	soil	0.1	12.7
2018-05-18	09:00:00	54	R	in_cylinder	soil	0.1	13.2
2018-05-18	10:00:00	54	R	in_cylinder	soil	0.1	13.7
2018-05-18	11:00:00	54	R	in_cylinder	soil	0.1	14.2
2018-05-18	12:00:00	54	R	in_cylinder	soil	0.1	15.2
2018-05-18	13:00:00	54	R	in_cylinder	soil	0.1	15.7
2018-05-18	14:00:00	54	R	in_cylinder	soil	0.1	16.7
2018-05-18	15:00:00	54	R	in_cylinder	soil	0.1	17.2
2018-05-18	16:00:00	54	R	in_cylinder	soil	0.1	17.2
2018-05-18	17:00:00	54	R	in_cylinder	soil	0.1	17.2
2018-05-18	18:00:00	54	R	in_cylinder	soil	0.1	17.2
2018-05-18	19:00:00	54	R	in_cylinder	soil	0.1	17.2
2018-05-18	20:00:00	54	R	in_cylinder	soil	0.1	16.7
2018-05-18	21:00:00	54	R	in_cylinder	soil	0.1	16.2
2018-05-18	22:00:00	54	R	in_cylinder	soil	0.1	15.7
2018-05-18	23:00:00	54	R	in_cylinder	soil	0.1	15.2
2018-05-19	00:00:00	54	R	in_cylinder	soil	0.1	14.7
2018-05-19	01:00:00	54	R	in_cylinder	soil	0.1	14.7
2018-05-19	02:00:00	54	R	in_cylinder	soil	0.1	14.2
2018-05-19	03:00:00	54	R	in_cylinder	soil	0.1	13.7
2018-05-19	04:00:00	54	R	in_cylinder	soil	0.1	13.7
2018-05-19	05:00:00	54	R	in_cylinder	soil	0.1	13.2
2018-05-19	06:00:00	54	R	in_cylinder	soil	0.1	12.7
2018-05-19	07:00:00	54	R	in_cylinder	soil	0.1	12.7
2018-05-19	08:00:00	54	R	in_cylinder	soil	0.1	13.2
2018-05-19	09:00:00	54	R	in_cylinder	soil	0.1	13.2
2018-05-19	10:00:00	54	R	in_cylinder	soil	0.1	14.2
2018-05-19	11:00:00	54	R	in_cylinder	soil	0.1	14.7
2018-05-19	12:00:00	54	R	in_cylinder	soil	0.1	15.7
2018-05-19	13:00:00	54	R	in_cylinder	soil	0.1	16.2
2018-05-19	14:00:00	54	R	in_cylinder	soil	0.1	17.2
2018-05-19	15:00:00	54	R	in_cylinder	soil	0.1	17.7
2018-05-19	16:00:00	54	R	in_cylinder	soil	0.1	18.2
2018-05-19	17:00:00	54	R	in_cylinder	soil	0.1	17.7
2018-05-19	18:00:00	54	R	in_cylinder	soil	0.1	17.7
2018-05-19	19:00:00	54	R	in_cylinder	soil	0.1	17.2
2018-05-19	20:00:00	54	R	in_cylinder	soil	0.1	16.7
2018-05-19	21:00:00	54	R	in_cylinder	soil	0.1	16.2
2018-05-19	22:00:00	54	R	in_cylinder	soil	0.1	15.7
2018-05-19	23:00:00	54	R	in_cylinder	soil	0.1	15.7
2018-05-20	00:00:00	54	R	in_cylinder	soil	0.1	15.2
2018-05-20	01:00:00	54	R	in_cylinder	soil	0.1	15.2
2018-05-20	02:00:00	54	R	in_cylinder	soil	0.1	14.7
2018-05-20	03:00:00	54	R	in_cylinder	soil	0.1	14.2
2018-05-20	04:00:00	54	R	in_cylinder	soil	0.1	14.2
2018-05-20	05:00:00	54	R	in_cylinder	soil	0.1	13.7
2018-05-20	06:00:00	54	R	in_cylinder	soil	0.1	13.7
2018-05-20	07:00:00	54	R	in_cylinder	soil	0.1	13.7
2018-05-20	08:00:00	54	R	in_cylinder	soil	0.1	13.7
2018-05-20	09:00:00	54	R	in_cylinder	soil	0.1	14.2
2018-05-20	10:00:00	54	R	in_cylinder	soil	0.1	14.7
2018-05-20	11:00:00	54	R	in_cylinder	soil	0.1	15.2
2018-05-20	12:00:00	54	R	in_cylinder	soil	0.1	15.7
2018-05-20	13:00:00	54	R	in_cylinder	soil	0.1	16.2
2018-05-20	14:00:00	54	R	in_cylinder	soil	0.1	16.7
2018-05-20	15:00:00	54	R	in_cylinder	soil	0.1	17.2
2018-05-20	16:00:00	54	R	in_cylinder	soil	0.1	17.2
2018-05-20	17:00:00	54	R	in_cylinder	soil	0.1	17.2
2018-05-20	18:00:00	54	R	in_cylinder	soil	0.1	17.2
2018-05-20	19:00:00	54	R	in_cylinder	soil	0.1	17.2
2018-05-20	20:00:00	54	R	in_cylinder	soil	0.1	16.7
2018-05-20	21:00:00	54	R	in_cylinder	soil	0.1	16.2
2018-05-20	22:00:00	54	R	in_cylinder	soil	0.1	16.2
2018-05-20	23:00:00	54	R	in_cylinder	soil	0.1	15.7
2018-05-21	00:00:00	54	R	in_cylinder	soil	0.1	15.7
2018-05-21	01:00:00	54	R	in_cylinder	soil	0.1	15.2
2018-05-21	02:00:00	54	R	in_cylinder	soil	0.1	14.7
2018-05-21	03:00:00	54	R	in_cylinder	soil	0.1	14.7
2018-05-21	04:00:00	54	R	in_cylinder	soil	0.1	14.7
2018-05-21	05:00:00	54	R	in_cylinder	soil	0.1	14.7
2018-05-21	06:00:00	54	R	in_cylinder	soil	0.1	14.7
2018-05-21	07:00:00	54	R	in_cylinder	soil	0.1	14.7
2018-05-21	08:00:00	54	R	in_cylinder	soil	0.1	14.7
2018-05-21	09:00:00	54	R	in_cylinder	soil	0.1	15.2
2018-05-21	10:00:00	54	R	in_cylinder	soil	0.1	16.2
2018-05-21	11:00:00	54	R	in_cylinder	soil	0.1	16.7
2018-05-21	12:00:00	54	R	in_cylinder	soil	0.1	17.2
2018-05-21	13:00:00	54	R	in_cylinder	soil	0.1	17.7
2018-05-21	14:00:00	54	R	in_cylinder	soil	0.1	17.7
2018-05-21	15:00:00	54	R	in_cylinder	soil	0.1	18.7
2018-05-21	16:00:00	54	R	in_cylinder	soil	0.1	18.7
2018-05-21	17:00:00	54	R	in_cylinder	soil	0.1	18.2
2018-05-21	18:00:00	54	R	in_cylinder	soil	0.1	17.7
2018-05-21	19:00:00	54	R	in_cylinder	soil	0.1	17.7
2018-05-21	20:00:00	54	R	in_cylinder	soil	0.1	17.7
2018-05-21	21:00:00	54	R	in_cylinder	soil	0.1	17.2
2018-05-21	22:00:00	54	R	in_cylinder	soil	0.1	16.7
2018-05-21	23:00:00	54	R	in_cylinder	soil	0.1	16.2
2018-05-22	00:00:00	54	R	in_cylinder	soil	0.1	16.2
2018-05-22	01:00:00	54	R	in_cylinder	soil	0.1	15.7
2018-05-22	02:00:00	54	R	in_cylinder	soil	0.1	15.7
2018-05-22	03:00:00	54	R	in_cylinder	soil	0.1	15.2
2018-05-22	04:00:00	54	R	in_cylinder	soil	0.1	15.2
2018-05-22	05:00:00	54	R	in_cylinder	soil	0.1	14.7
2018-05-22	06:00:00	54	R	in_cylinder	soil	0.1	14.7
2018-05-22	07:00:00	54	R	in_cylinder	soil	0.1	14.7
2018-05-22	08:00:00	54	R	in_cylinder	soil	0.1	14.7
2018-05-22	09:00:00	54	R	in_cylinder	soil	0.1	15.2
2018-05-22	10:00:00	54	R	in_cylinder	soil	0.1	16.2
2018-05-22	11:00:00	54	R	in_cylinder	soil	0.1	17.2
2018-05-22	12:00:00	54	R	in_cylinder	soil	0.1	17.7
2018-05-22	13:00:00	54	R	in_cylinder	soil	0.1	18.7
2018-05-22	14:00:00	54	R	in_cylinder	soil	0.1	19.2
2018-05-22	15:00:00	54	R	in_cylinder	soil	0.1	19.7
2018-05-22	16:00:00	54	R	in_cylinder	soil	0.1	19.2
2018-05-22	17:00:00	54	R	in_cylinder	soil	0.1	18.7
2018-05-22	18:00:00	54	R	in_cylinder	soil	0.1	18.7
2018-05-22	19:00:00	54	R	in_cylinder	soil	0.1	18.2
2018-05-22	20:00:00	54	R	in_cylinder	soil	0.1	18.2
2018-05-22	21:00:00	54	R	in_cylinder	soil	0.1	17.7
2018-05-22	22:00:00	54	R	in_cylinder	soil	0.1	17.7
2018-05-22	23:00:00	54	R	in_cylinder	soil	0.1	17.2
2018-05-23	00:00:00	54	R	in_cylinder	soil	0.1	17.2
2018-05-23	01:00:00	54	R	in_cylinder	soil	0.1	16.7
2018-05-23	02:00:00	54	R	in_cylinder	soil	0.1	16.7
2018-05-23	03:00:00	54	R	in_cylinder	soil	0.1	16.2
2018-05-23	04:00:00	54	R	in_cylinder	soil	0.1	15.7
2018-05-23	05:00:00	54	R	in_cylinder	soil	0.1	15.7
2018-05-23	06:00:00	54	R	in_cylinder	soil	0.1	15.2
2018-05-23	07:00:00	54	R	in_cylinder	soil	0.1	15.2
2018-05-23	08:00:00	54	R	in_cylinder	soil	0.1	15.7
2018-05-23	09:00:00	54	R	in_cylinder	soil	0.1	15.7
2018-05-23	10:00:00	54	R	in_cylinder	soil	0.1	15.7
2018-05-23	11:00:00	54	R	in_cylinder	soil	0.1	16.2
2018-05-23	12:00:00	54	R	in_cylinder	soil	0.1	17.2
2018-05-23	13:00:00	54	R	in_cylinder	soil	0.1	18.2
2018-05-23	14:00:00	54	R	in_cylinder	soil	0.1	18.7
2018-05-23	15:00:00	54	R	in_cylinder	soil	0.1	18.7
2018-05-23	16:00:00	54	R	in_cylinder	soil	0.1	18.7
2018-05-23	17:00:00	54	R	in_cylinder	soil	0.1	18.2
2018-05-23	18:00:00	54	R	in_cylinder	soil	0.1	18.2
2018-05-23	19:00:00	54	R	in_cylinder	soil	0.1	18.2
2018-05-23	20:00:00	54	R	in_cylinder	soil	0.1	18.2
2018-05-23	21:00:00	54	R	in_cylinder	soil	0.1	17.7
2018-05-23	22:00:00	54	R	in_cylinder	soil	0.1	17.7
2018-05-23	23:00:00	54	R	in_cylinder	soil	0.1	17.2
2018-05-24	00:00:00	54	R	in_cylinder	soil	0.1	17.2
2018-05-24	01:00:00	54	R	in_cylinder	soil	0.1	17.2
2018-05-24	02:00:00	54	R	in_cylinder	soil	0.1	16.7
2018-05-24	03:00:00	54	R	in_cylinder	soil	0.1	16.7
2018-05-24	04:00:00	54	R	in_cylinder	soil	0.1	16.7
2018-05-24	05:00:00	54	R	in_cylinder	soil	0.1	16.2
2018-05-24	06:00:00	54	R	in_cylinder	soil	0.1	16.2
2018-05-24	07:00:00	54	R	in_cylinder	soil	0.1	16.2
2018-05-24	08:00:00	54	R	in_cylinder	soil	0.1	16.2
2018-05-24	09:00:00	54	R	in_cylinder	soil	0.1	16.7
2018-05-24	10:00:00	54	R	in_cylinder	soil	0.1	17.7
2018-05-24	11:00:00	54	R	in_cylinder	soil	0.1	18.2
2018-05-24	12:00:00	54	R	in_cylinder	soil	0.1	18.7
2018-05-24	13:00:00	54	R	in_cylinder	soil	0.1	19.2
2018-05-24	14:00:00	54	R	in_cylinder	soil	0.1	20.2
2018-05-24	15:00:00	54	R	in_cylinder	soil	0.1	20.2
2018-05-24	16:00:00	54	R	in_cylinder	soil	0.1	20.2
2018-05-24	17:00:00	54	R	in_cylinder	soil	0.1	20.2
2018-05-24	18:00:00	54	R	in_cylinder	soil	0.1	19.7
2018-05-24	19:00:00	54	R	in_cylinder	soil	0.1	19.7
2018-05-24	20:00:00	54	R	in_cylinder	soil	0.1	19.2
2018-05-24	21:00:00	54	R	in_cylinder	soil	0.1	18.7
2018-05-24	22:00:00	54	R	in_cylinder	soil	0.1	18.2
2018-05-24	23:00:00	54	R	in_cylinder	soil	0.1	18.2
2018-05-25	00:00:00	54	R	in_cylinder	soil	0.1	17.7
2018-05-25	01:00:00	54	R	in_cylinder	soil	0.1	17.2
2018-05-25	02:00:00	54	R	in_cylinder	soil	0.1	16.7
2018-05-25	03:00:00	54	R	in_cylinder	soil	0.1	16.2
2018-05-25	04:00:00	54	R	in_cylinder	soil	0.1	16.2
2018-05-25	05:00:00	54	R	in_cylinder	soil	0.1	15.7
2018-05-25	06:00:00	54	R	in_cylinder	soil	0.1	15.7
2018-05-25	07:00:00	54	R	in_cylinder	soil	0.1	15.7
2018-05-25	08:00:00	54	R	in_cylinder	soil	0.1	15.7
2018-05-25	09:00:00	54	R	in_cylinder	soil	0.1	16.2
2018-05-25	10:00:00	54	R	in_cylinder	soil	0.1	17.2
2018-05-25	11:00:00	54	R	in_cylinder	soil	0.1	18.2
2018-05-25	12:00:00	54	R	in_cylinder	soil	0.1	19.2
2018-05-25	13:00:00	54	R	in_cylinder	soil	0.1	19.7
2018-05-25	14:00:00	54	R	in_cylinder	soil	0.1	20.2
2018-05-25	15:00:00	54	R	in_cylinder	soil	0.1	20.7
2018-05-25	16:00:00	54	R	in_cylinder	soil	0.1	20.7
2018-05-25	17:00:00	54	R	in_cylinder	soil	0.1	20.7
2018-05-25	18:00:00	54	R	in_cylinder	soil	0.1	20.7
2018-05-25	19:00:00	54	R	in_cylinder	soil	0.1	20.2
2018-05-25	20:00:00	54	R	in_cylinder	soil	0.1	20.2
2018-05-25	21:00:00	54	R	in_cylinder	soil	0.1	19.7
2018-05-25	22:00:00	54	R	in_cylinder	soil	0.1	19.2
2018-05-25	23:00:00	54	R	in_cylinder	soil	0.1	18.7
2018-05-26	00:00:00	54	R	in_cylinder	soil	0.1	18.2
2018-05-26	01:00:00	54	R	in_cylinder	soil	0.1	18.2
2018-05-26	02:00:00	54	R	in_cylinder	soil	0.1	17.7
2018-05-26	03:00:00	54	R	in_cylinder	soil	0.1	17.2
2018-05-26	04:00:00	54	R	in_cylinder	soil	0.1	17.2
2018-05-26	05:00:00	54	R	in_cylinder	soil	0.1	16.7
2018-05-26	06:00:00	54	R	in_cylinder	soil	0.1	16.7
2018-05-26	07:00:00	54	R	in_cylinder	soil	0.1	16.7
2018-05-26	08:00:00	54	R	in_cylinder	soil	0.1	16.7
2018-05-26	09:00:00	54	R	in_cylinder	soil	0.1	17.2
2018-05-26	10:00:00	54	R	in_cylinder	soil	0.1	18.2
2018-05-26	11:00:00	54	R	in_cylinder	soil	0.1	19.2
2018-05-26	12:00:00	54	R	in_cylinder	soil	0.1	19.7
2018-05-26	13:00:00	54	R	in_cylinder	soil	0.1	20.2
2018-05-26	14:00:00	54	R	in_cylinder	soil	0.1	20.7
2018-05-26	15:00:00	54	R	in_cylinder	soil	0.1	21.2
2018-05-26	16:00:00	54	R	in_cylinder	soil	0.1	21.2
2018-05-26	17:00:00	54	R	in_cylinder	soil	0.1	21.2
2018-05-26	18:00:00	54	R	in_cylinder	soil	0.1	21.2
2018-05-26	19:00:00	54	R	in_cylinder	soil	0.1	20.7
2018-05-26	20:00:00	54	R	in_cylinder	soil	0.1	20.7
2018-05-26	21:00:00	54	R	in_cylinder	soil	0.1	20.2
2018-05-26	22:00:00	54	R	in_cylinder	soil	0.1	19.7
2018-05-26	23:00:00	54	R	in_cylinder	soil	0.1	19.7
2018-05-27	00:00:00	54	R	in_cylinder	soil	0.1	19.2
2018-05-27	01:00:00	54	R	in_cylinder	soil	0.1	18.7
2018-05-27	02:00:00	54	R	in_cylinder	soil	0.1	18.7
2018-05-27	03:00:00	54	R	in_cylinder	soil	0.1	18.2
2018-05-27	04:00:00	54	R	in_cylinder	soil	0.1	17.7
2018-05-27	05:00:00	54	R	in_cylinder	soil	0.1	17.7
2018-05-27	06:00:00	54	R	in_cylinder	soil	0.1	17.2
2018-05-27	07:00:00	54	R	in_cylinder	soil	0.1	17.2
2018-05-27	08:00:00	54	R	in_cylinder	soil	0.1	17.7
2018-05-27	09:00:00	54	R	in_cylinder	soil	0.1	18.2
2018-05-27	10:00:00	54	R	in_cylinder	soil	0.1	18.7
2018-05-27	11:00:00	54	R	in_cylinder	soil	0.1	19.7
2018-05-27	12:00:00	54	R	in_cylinder	soil	0.1	19.7
2018-05-27	13:00:00	54	R	in_cylinder	soil	0.1	19.7
2018-05-27	14:00:00	54	R	in_cylinder	soil	0.1	20.2
2018-05-27	15:00:00	54	R	in_cylinder	soil	0.1	20.2
2018-05-27	16:00:00	54	R	in_cylinder	soil	0.1	20.7
2018-05-27	17:00:00	54	R	in_cylinder	soil	0.1	20.7
2018-05-27	18:00:00	54	R	in_cylinder	soil	0.1	20.7
2018-05-27	19:00:00	54	R	in_cylinder	soil	0.1	20.7
2018-05-27	20:00:00	54	R	in_cylinder	soil	0.1	20.7
2018-05-27	21:00:00	54	R	in_cylinder	soil	0.1	20.2
2018-05-27	22:00:00	54	R	in_cylinder	soil	0.1	19.7
2018-05-27	23:00:00	54	R	in_cylinder	soil	0.1	19.7
2018-05-28	00:00:00	54	R	in_cylinder	soil	0.1	19.2
2018-05-28	01:00:00	54	R	in_cylinder	soil	0.1	18.7
2018-05-28	02:00:00	54	R	in_cylinder	soil	0.1	18.2
2018-05-28	03:00:00	54	R	in_cylinder	soil	0.1	18.2
2018-05-28	04:00:00	54	R	in_cylinder	soil	0.1	18.2
2018-05-28	05:00:00	54	R	in_cylinder	soil	0.1	17.7
2018-05-28	06:00:00	54	R	in_cylinder	soil	0.1	17.7
2018-05-28	07:00:00	54	R	in_cylinder	soil	0.1	17.7
2018-05-28	08:00:00	54	R	in_cylinder	soil	0.1	17.7
2018-05-28	09:00:00	54	R	in_cylinder	soil	0.1	18.2
2018-05-28	10:00:00	54	R	in_cylinder	soil	0.1	18.7
2018-05-28	11:00:00	54	R	in_cylinder	soil	0.1	19.2
2018-05-28	12:00:00	54	R	in_cylinder	soil	0.1	19.7
2018-05-28	13:00:00	54	R	in_cylinder	soil	0.1	20.2
2018-05-28	14:00:00	54	R	in_cylinder	soil	0.1	20.7
2018-05-28	15:00:00	54	R	in_cylinder	soil	0.1	21.2
2018-05-28	16:00:00	54	R	in_cylinder	soil	0.1	21.7
2018-05-28	17:00:00	54	R	in_cylinder	soil	0.1	21.7
2018-05-28	18:00:00	54	R	in_cylinder	soil	0.1	21.7
2018-05-28	19:00:00	54	R	in_cylinder	soil	0.1	21.7
2018-05-28	20:00:00	54	R	in_cylinder	soil	0.1	21.2
2018-05-28	21:00:00	54	R	in_cylinder	soil	0.1	21.2
2018-05-28	22:00:00	54	R	in_cylinder	soil	0.1	20.7
2018-05-28	23:00:00	54	R	in_cylinder	soil	0.1	20.2
2018-05-29	00:00:00	54	R	in_cylinder	soil	0.1	19.7
2018-05-29	01:00:00	54	R	in_cylinder	soil	0.1	19.2
2018-05-29	02:00:00	54	R	in_cylinder	soil	0.1	19.2
2018-05-29	03:00:00	54	R	in_cylinder	soil	0.1	18.7
2018-05-29	04:00:00	54	R	in_cylinder	soil	0.1	18.7
2018-05-29	05:00:00	54	R	in_cylinder	soil	0.1	18.7
2018-05-29	06:00:00	54	R	in_cylinder	soil	0.1	18.2
2018-05-29	07:00:00	54	R	in_cylinder	soil	0.1	18.2
2018-05-29	08:00:00	54	R	in_cylinder	soil	0.1	17.7
2018-05-29	09:00:00	54	R	in_cylinder	soil	0.1	17.7
2018-05-29	10:00:00	54	R	in_cylinder	soil	0.1	17.7
2018-05-29	11:00:00	54	R	in_cylinder	soil	0.1	18.2
2018-05-29	12:00:00	54	R	in_cylinder	soil	0.1	18.7
2018-05-29	13:00:00	54	R	in_cylinder	soil	0.1	19.2
2018-05-29	14:00:00	54	R	in_cylinder	soil	0.1	20.2
2018-05-29	15:00:00	54	R	in_cylinder	soil	0.1	20.7
2018-05-29	16:00:00	54	R	in_cylinder	soil	0.1	21.2
2018-05-29	17:00:00	54	R	in_cylinder	soil	0.1	21.2
2018-05-29	18:00:00	54	R	in_cylinder	soil	0.1	21.2
2018-05-29	19:00:00	54	R	in_cylinder	soil	0.1	20.7
2018-05-29	20:00:00	54	R	in_cylinder	soil	0.1	20.7
2018-05-29	21:00:00	54	R	in_cylinder	soil	0.1	20.2
2018-05-29	22:00:00	54	R	in_cylinder	soil	0.1	19.7
2018-05-29	23:00:00	54	R	in_cylinder	soil	0.1	19.2
2018-05-30	00:00:00	54	R	in_cylinder	soil	0.1	18.7
2018-05-30	01:00:00	54	R	in_cylinder	soil	0.1	18.2
2018-05-30	02:00:00	54	R	in_cylinder	soil	0.1	18.2
2018-05-30	03:00:00	54	R	in_cylinder	soil	0.1	17.7
2018-05-30	04:00:00	54	R	in_cylinder	soil	0.1	17.2
2018-05-30	05:00:00	54	R	in_cylinder	soil	0.1	17.2
2018-05-30	06:00:00	54	R	in_cylinder	soil	0.1	17.2
2018-05-30	07:00:00	54	R	in_cylinder	soil	0.1	17.2
2018-05-30	08:00:00	54	R	in_cylinder	soil	0.1	17.2
2018-05-30	09:00:00	54	R	in_cylinder	soil	0.1	17.7
2018-05-30	10:00:00	54	R	in_cylinder	soil	0.1	18.7
2018-05-30	11:00:00	54	R	in_cylinder	soil	0.1	19.2
2018-05-30	12:00:00	54	R	in_cylinder	soil	0.1	20.2
2018-05-30	13:00:00	54	R	in_cylinder	soil	0.1	20.7
2018-05-30	14:00:00	54	R	in_cylinder	soil	0.1	21.7
2018-05-30	15:00:00	54	R	in_cylinder	soil	0.1	22.2
2018-05-30	16:00:00	54	R	in_cylinder	soil	0.1	22.2
2018-05-30	17:00:00	54	R	in_cylinder	soil	0.1	21.7
2018-05-30	18:00:00	54	R	in_cylinder	soil	0.1	21.7
2018-05-30	19:00:00	54	R	in_cylinder	soil	0.1	21.7
2018-05-30	20:00:00	54	R	in_cylinder	soil	0.1	21.2
2018-05-30	21:00:00	54	R	in_cylinder	soil	0.1	20.7
2018-05-30	22:00:00	54	R	in_cylinder	soil	0.1	20.2
2018-05-30	23:00:00	54	R	in_cylinder	soil	0.1	19.7
2018-05-31	00:00:00	54	R	in_cylinder	soil	0.1	19.2
2018-05-31	01:00:00	54	R	in_cylinder	soil	0.1	19.2
2018-05-31	02:00:00	54	R	in_cylinder	soil	0.1	19.2
2018-05-31	03:00:00	54	R	in_cylinder	soil	0.1	18.7
2018-05-31	04:00:00	54	R	in_cylinder	soil	0.1	18.7
2018-05-31	05:00:00	54	R	in_cylinder	soil	0.1	18.2
2018-05-31	06:00:00	54	R	in_cylinder	soil	0.1	18.2
2018-05-31	07:00:00	54	R	in_cylinder	soil	0.1	18.2
2018-05-31	08:00:00	54	R	in_cylinder	soil	0.1	18.2
2018-05-31	09:00:00	54	R	in_cylinder	soil	0.1	18.2
2018-05-31	10:00:00	54	R	in_cylinder	soil	0.1	18.7
2018-05-31	11:00:00	54	R	in_cylinder	soil	0.1	19.2
2018-05-31	12:00:00	54	R	in_cylinder	soil	0.1	20.2
2018-05-31	13:00:00	54	R	in_cylinder	soil	0.1	20.2
2018-05-31	14:00:00	54	R	in_cylinder	soil	0.1	20.7
2018-05-31	15:00:00	54	R	in_cylinder	soil	0.1	21.2
2018-05-31	16:00:00	54	R	in_cylinder	soil	0.1	21.2
2018-05-31	17:00:00	54	R	in_cylinder	soil	0.1	21.2
2018-05-31	18:00:00	54	R	in_cylinder	soil	0.1	20.7
2018-05-31	19:00:00	54	R	in_cylinder	soil	0.1	19.7
2018-05-31	20:00:00	54	R	in_cylinder	soil	0.1	19.2
2018-05-31	21:00:00	54	R	in_cylinder	soil	0.1	18.7
2018-05-31	22:00:00	54	R	in_cylinder	soil	0.1	18.7
2018-05-31	23:00:00	54	R	in_cylinder	soil	0.1	18.2
2018-06-01	00:00:00	54	R	in_cylinder	soil	0.1	17.7
[truncated: 38,745 more rows]

## Sheet: sheet4
Date	Time	Plot	Treatment	Compartment	Height	Temperature
2018-03-10	00:59:00	44	C	air	1.2	5.6
2018-03-10	01:59:00	44	C	air	1.2	5.6
2018-03-10	02:59:00	44	C	air	1.2	5.6
2018-03-10	03:59:00	44	C	air	1.2	5.6
2018-03-10	04:59:00	44	C	air	1.2	5.6
2018-03-10	05:59:00	44	C	air	1.2	5.6
2018-03-10	06:59:00	44	C	air	1.2	6.6
2018-03-10	07:59:00	44	C	air	1.2	7.1
2018-03-10	08:59:00	44	C	air	1.2	8.6
2018-03-10	09:59:00	44	C	air	1.2	9.1
2018-03-10	10:59:00	44	C	air	1.2	10.1
2018-03-10	11:59:00	44	C	air	1.2	10.6
2018-03-10	12:59:00	44	C	air	1.2	11.1
2018-03-10	13:59:00	44	C	air	1.2	14.6
2018-03-10	14:59:00	44	C	air	1.2	16.1
2018-03-10	15:59:00	44	C	air	1.2	16.6
2018-03-10	16:59:00	44	C	air	1.2	15.6
2018-03-10	17:59:00	44	C	air	1.2	12.6
2018-03-10	18:59:00	44	C	air	1.2	9.6
2018-03-10	19:59:00	44	C	air	1.2	9.1
2018-03-10	20:59:00	44	C	air	1.2	8.1
2018-03-10	21:59:00	44	C	air	1.2	8.1
2018-03-10	22:59:00	44	C	air	1.2	7.1
2018-03-10	23:59:00	44	C	air	1.2	6.6
2018-03-11	00:59:00	44	C	air	1.2	8.6
2018-03-11	01:59:00	44	C	air	1.2	5.1
2018-03-11	02:59:00	44	C	air	1.2	4.6
2018-03-11	03:59:00	44	C	air	1.2	5.1
2018-03-11	04:59:00	44	C	air	1.2	6.1
2018-03-11	05:59:00	44	C	air	1.2	5.1
2018-03-11	06:59:00	44	C	air	1.2	5.6
2018-03-11	07:59:00	44	C	air	1.2	7.1
2018-03-11	08:59:00	44	C	air	1.2	7.6
2018-03-11	09:59:00	44	C	air	1.2	11.6
2018-03-11	10:59:00	44	C	air	1.2	13.1
2018-03-11	11:59:00	44	C	air	1.2	13.6
2018-03-11	12:59:00	44	C	air	1.2	12.6
2018-03-11	13:59:00	44	C	air	1.2	12.1
2018-03-11	14:59:00	44	C	air	1.2	11.1
2018-03-11	15:59:00	44	C	air	1.2	10.6
2018-03-11	16:59:00	44	C	air	1.2	10.1
2018-03-11	17:59:00	44	C	air	1.2	9.6
2018-03-11	18:59:00	44	C	air	1.2	8.1
2018-03-11	19:59:00	44	C	air	1.2	8.1
2018-03-11	20:59:00	44	C	air	1.2	6.6
2018-03-11	21:59:00	44	C	air	1.2	7.1
2018-03-11	22:59:00	44	C	air	1.2	6.1
2018-03-11	23:59:00	44	C	air	1.2	3.6
2018-03-12	00:59:00	44	C	air	1.2	3.6
2018-03-12	01:59:00	44	C	air	1.2	2.5
2018-03-12	02:59:00	44	C	air	1.2	2
2018-03-12	03:59:00	44	C	air	1.2	2.5
2018-03-12	04:59:00	44	C	air	1.2	2
2018-03-12	05:59:00	44	C	air	1.2	3
2018-03-12	06:59:00	44	C	air	1.2	3.6
2018-03-12	07:59:00	44	C	air	1.2	5.1
2018-03-12	08:59:00	44	C	air	1.2	10.6
2018-03-12	09:59:00	44	C	air	1.2	12.6
2018-03-12	10:59:00	44	C	air	1.2	13.6
2018-03-12	11:59:00	44	C	air	1.2	14.6
2018-03-12	12:59:00	44	C	air	1.2	14.6
2018-03-12	13:59:00	44	C	air	1.2	14.1
2018-03-12	14:59:00	44	C	air	1.2	16.1
2018-03-12	15:59:00	44	C	air	1.2	13.6
2018-03-12	16:59:00	44	C	air	1.2	12.1
2018-03-12	17:59:00	44	C	air	1.2	11.1
2018-03-12	18:59:00	44	C	air	1.2	10.1
2018-03-12	19:59:00	44	C	air	1.2	9.6
2018-03-12	20:59:00	44	C	air	1.2	9.1
2018-03-12	21:59:00	44	C	air	1.2	8.1
2018-03-12	22:59:00	44	C	air	1.2	8.1
2018-03-12	23:59:00	44	C	air	1.2	8.1
2018-03-13	00:59:00	44	C	air	1.2	8.1
2018-03-13	01:59:00	44	C	air	1.2	7.6
2018-03-13	02:59:00	44	C	air	1.2	7.6
2018-03-13	03:59:00	44	C	air	1.2	6.6
2018-03-13	04:59:00	44	C	air	1.2	7.1
2018-03-13	05:59:00	44	C	air	1.2	7.1
2018-03-13	06:59:00	44	C	air	1.2	7.6
2018-03-13	07:59:00	44	C	air	1.2	7.6
2018-03-13	08:59:00	44	C	air	1.2	9.1
2018-03-13	09:59:00	44	C	air	1.2	8.1
2018-03-13	10:59:00	44	C	air	1.2	10.6
2018-03-13	11:59:00	44	C	air	1.2	11.1
2018-03-13	12:59:00	44	C	air	1.2	10.6
2018-03-13	13:59:00	44	C	air	1.2	10.1
2018-03-13	14:59:00	44	C	air	1.2	9.1
2018-03-13	15:59:00	44	C	air	1.2	8.1
2018-03-13	16:59:00	44	C	air	1.2	8.1
2018-03-13	17:59:00	44	C	air	1.2	7.1
2018-03-13	18:59:00	44	C	air	1.2	6.6
2018-03-13	19:59:00	44	C	air	1.2	6.6
2018-03-13	20:59:00	44	C	air	1.2	7.1
2018-03-13	21:59:00	44	C	air	1.2	6.6
2018-03-13	22:59:00	44	C	air	1.2	6.6
2018-03-13	23:59:00	44	C	air	1.2	5.1
2018-03-14	00:59:00	44	C	air	1.2	5.1
2018-03-14	01:59:00	44	C	air	1.2	4.6
2018-03-14	02:59:00	44	C	air	1.2	5.1
2018-03-14	03:59:00	44	C	air	1.2	5.6
2018-03-14	04:59:00	44	C	air	1.2	4.6
2018-03-14	05:59:00	44	C	air	1.2	5.1
2018-03-14	06:59:00	44	C	air	1.2	4.6
2018-03-14	07:59:00	44	C	air	1.2	14.1
2018-03-14	08:59:00	44	C	air	1.2	17.6
2018-03-14	09:59:00	44	C	air	1.2	13.1
2018-03-14	10:59:00	44	C	air	1.2	18.1
2018-03-14	11:59:00	44	C	air	1.2	18.6
2018-03-14	12:59:00	44	C	air	1.2	17.6
2018-03-14	13:59:00	44	C	air	1.2	18.1
2018-03-14	14:59:00	44	C	air	1.2	15.6
2018-03-14	15:59:00	44	C	air	1.2	21.1
2018-03-14	16:59:00	44	C	air	1.2	20.6
2018-03-14	17:59:00	44	C	air	1.2	16.1
2018-03-14	18:59:00	44	C	air	1.2	6.1
2018-03-14	19:59:00	44	C	air	1.2	4.6
2018-03-14	20:59:00	44	C	air	1.2	2.5
2018-03-14	21:59:00	44	C	air	1.2	2.5
2018-03-14	22:59:00	44	C	air	1.2	1.5
2018-03-14	23:59:00	44	C	air	1.2	2
2018-03-15	00:59:00	44	C	air	1.2	4.1
2018-03-15	01:59:00	44	C	air	1.2	2
2018-03-15	02:59:00	44	C	air	1.2	0.5
2018-03-15	03:59:00	44	C	air	1.2	0.5
2018-03-15	04:59:00	44	C	air	1.2	1
2018-03-15	05:59:00	44	C	air	1.2	1.5
2018-03-15	06:59:00	44	C	air	1.2	3.6
2018-03-15	07:59:00	44	C	air	1.2	6.6
2018-03-15	08:59:00	44	C	air	1.2	8.1
2018-03-15	09:59:00	44	C	air	1.2	7.1
2018-03-15	10:59:00	44	C	air	1.2	7.6
2018-03-15	11:59:00	44	C	air	1.2	8.6
2018-03-15	12:59:00	44	C	air	1.2	10.1
2018-03-15	13:59:00	44	C	air	1.2	11.1
2018-03-15	14:59:00	44	C	air	1.2	12.6
2018-03-15	15:59:00	44	C	air	1.2	11.1
2018-03-15	16:59:00	44	C	air	1.2	10.1
2018-03-15	17:59:00	44	C	air	1.2	9.1
2018-03-15	18:59:00	44	C	air	1.2	7.6
2018-03-15	19:59:00	44	C	air	1.2	7.1
2018-03-15	20:59:00	44	C	air	1.2	5.6
2018-03-15	21:59:00	44	C	air	1.2	6.1
2018-03-15	22:59:00	44	C	air	1.2	4.6
2018-03-15	23:59:00	44	C	air	1.2	3
2018-03-16	00:59:00	44	C	air	1.2	1.5
2018-03-16	01:59:00	44	C	air	1.2	1.5
2018-03-16	02:59:00	44	C	air	1.2	1
2018-03-16	03:59:00	44	C	air	1.2	1.5
2018-03-16	04:59:00	44	C	air	1.2	2.5
2018-03-16	05:59:00	44	C	air	1.2	3
2018-03-16	06:59:00	44	C	air	1.2	3
2018-03-16	07:59:00	44	C	air	1.2	6.1
2018-03-16	08:59:00	44	C	air	1.2	8.1
2018-03-16	09:59:00	44	C	air	1.2	9.6
2018-03-16	10:59:00	44	C	air	1.2	13.1
2018-03-16	11:59:00	44	C	air	1.2	11.6
2018-03-16	12:59:00	44	C	air	1.2	13.6
2018-03-16	13:59:00	44	C	air	1.2	22.6
2018-03-16	14:59:00	44	C	air	1.2	13.6
2018-03-16	15:59:00	44	C	air	1.2	12.6
2018-03-16	16:59:00	44	C	air	1.2	12.6
2018-03-16	17:59:00	44	C	air	1.2	11.6
2018-03-16	18:59:00	44	C	air	1.2	8.6
2018-03-16	19:59:00	44	C	air	1.2	7.1
2018-03-16	20:59:00	44	C	air	1.2	4.6
2018-03-16	21:59:00	44	C	air	1.2	3
2018-03-16	22:59:00	44	C	air	1.2	2.5
2018-03-16	23:59:00	44	C	air	1.2	2.5
2018-03-17	00:59:00	44	C	air	1.2	1
2018-03-17	01:59:00	44	C	air	1.2	1
2018-03-17	02:59:00	44	C	air	1.2	1
2018-03-17	03:59:00	44	C	air	1.2	1.5
2018-03-17	04:59:00	44	C	air	1.2	1
2018-03-17	05:59:00	44	C	air	1.2	1
2018-03-17	06:59:00	44	C	air	1.2	2
2018-03-17	07:59:00	44	C	air	1.2	3.6
2018-03-17	08:59:00	44	C	air	1.2	4.1
2018-03-17	09:59:00	44	C	air	1.2	5.1
2018-03-17	10:59:00	44	C	air	1.2	5.1
2018-03-17	11:59:00	44	C	air	1.2	4.6
2018-03-17	12:59:00	44	C	air	1.2	4.6
2018-03-17	13:59:00	44	C	air	1.2	4.1
2018-03-17	14:59:00	44	C	air	1.2	4.1
2018-03-17	15:59:00	44	C	air	1.2	3.6
2018-03-17	16:59:00	44	C	air	1.2	2
2018-03-17	17:59:00	44	C	air	1.2	0.5
2018-03-17	18:59:00	44	C	air	1.2	0.5
2018-03-17	19:59:00	44	C	air	1.2	0
2018-03-17	20:59:00	44	C	air	1.2	0
2018-03-17	21:59:00	44	C	air	1.2	-0.5
2018-03-17	22:59:00	44	C	air	1.2	-0.5
2018-03-17	23:59:00	44	C	air	1.2	-1
2018-03-18	00:59:00	44	C	air	1.2	-1
2018-03-18	01:59:00	44	C	air	1.2	-1.5
2018-03-18	02:59:00	44	C	air	1.2	-2
2018-03-18	03:59:00	44	C	air	1.2	-2.5
2018-03-18	04:59:00	44	C	air	1.2	-2.5
2018-03-18	05:59:00	44	C	air	1.2	-3
2018-03-18	06:59:00	44	C	air	1.2	-2.5
2018-03-18	07:59:00	44	C	air	1.2	0
2018-03-18	08:59:00	44	C	air	1.2	0
2018-03-18	09:59:00	44	C	air	1.2	1
2018-03-18	10:59:00	44	C	air	1.2	3
2018-03-18	11:59:00	44	C	air	1.2	2.5
2018-03-18	12:59:00	44	C	air	1.2	1.5
2018-03-18	13:59:00	44	C	air	1.2	3.6
2018-03-18	14:59:00	44	C	air	1.2	2.5
2018-03-18	15:59:00	44	C	air	1.2	1.5
2018-03-18	16:59:00	44	C	air	1.2	1
2018-03-18	17:59:00	44	C	air	1.2	-0.5
2018-03-18	18:59:00	44	C	air	1.2	-1
2018-03-18	19:59:00	44	C	air	1.2	-1
2018-03-18	20:59:00	44	C	air	1.2	-1
2018-03-18	21:59:00	44	C	air	1.2	-1.5
2018-03-18	22:59:00	44	C	air	1.2	-1.5
2018-03-18	23:59:00	44	C	air	1.2	-1.5
2018-03-19	00:59:00	44	C	air	1.2	-1.5
2018-03-19	01:59:00	44	C	air	1.2	-2
2018-03-19	02:59:00	44	C	air	1.2	-1.5
2018-03-19	03:59:00	44	C	air	1.2	-1.5
2018-03-19	04:59:00	44	C	air	1.2	-1.5
2018-03-19	05:59:00	44	C	air	1.2	-2
2018-03-19	06:59:00	44	C	air	1.2	-1.5
2018-03-19	07:59:00	44	C	air	1.2	0.5
2018-03-19	08:59:00	44	C	air	1.2	5.1
2018-03-19	09:59:00	44	C	air	1.2	3
2018-03-19	10:59:00	44	C	air	1.2	2.5
2018-03-19	11:59:00	44	C	air	1.2	3.6
2018-03-19	12:59:00	44	C	air	1.2	6.1
2018-03-19	13:59:00	44	C	air	1.2	5.6
2018-03-19	14:59:00	44	C	air	1.2	3
2018-03-19	15:59:00	44	C	air	1.2	2
2018-03-19	16:59:00	44	C	air	1.2	1.5
2018-03-19	17:59:00	44	C	air	1.2	0.5
2018-03-19	18:59:00	44	C	air	1.2	0
2018-03-19	19:59:00	44	C	air	1.2	0
2018-03-19	20:59:00	44	C	air	1.2	0
2018-03-19	21:59:00	44	C	air	1.2	0
2018-03-19	22:59:00	44	C	air	1.2	-0.5
2018-03-19	23:59:00	44	C	air	1.2	-1
2018-03-20	00:59:00	44	C	air	1.2	-1
2018-03-20	01:59:00	44	C	air	1.2	-1
2018-03-20	02:59:00	44	C	air	1.2	-1
2018-03-20	03:59:00	44	C	air	1.2	-1.5
2018-03-20	04:59:00	44	C	air	1.2	-1.5
2018-03-20	05:59:00	44	C	air	1.2	-1.5
2018-03-20	06:59:00	44	C	air	1.2	-1.5
2018-03-20	07:59:00	44	C	air	1.2	-1
2018-03-20	08:59:00	44	C	air	1.2	0
2018-03-20	09:59:00	44	C	air	1.2	1
2018-03-20	10:59:00	44	C	air	1.2	1.5
2018-03-20	11:59:00	44	C	air	1.2	2
2018-03-20	12:59:00	44	C	air	1.2	4.1
2018-03-20	13:59:00	44	C	air	1.2	8.6
2018-03-20	14:59:00	44	C	air	1.2	5.1
2018-03-20	15:59:00	44	C	air	1.2	2.5
2018-03-20	16:59:00	44	C	air	1.2	2.5
2018-03-20	17:59:00	44	C	air	1.2	1.5
2018-03-20	18:59:00	44	C	air	1.2	1
2018-03-20	19:59:00	44	C	air	1.2	0.5
2018-03-20	20:59:00	44	C	air	1.2	0
2018-03-20	21:59:00	44	C	air	1.2	0.5
2018-03-20	22:59:00	44	C	air	1.2	0
2018-03-20	23:59:00	44	C	air	1.2	-0.5
2018-03-21	00:59:00	44	C	air	1.2	0
2018-03-21	01:59:00	44	C	air	1.2	0
2018-03-21	02:59:00	44	C	air	1.2	0
2018-03-21	03:59:00	44	C	air	1.2	0
2018-03-21	04:59:00	44	C	air	1.2	-0.5
2018-03-21	05:59:00	44	C	air	1.2	-0.5
2018-03-21	06:59:00	44	C	air	1.2	-0.5
2018-03-21	07:59:00	44	C	air	1.2	0
2018-03-21	08:59:00	44	C	air	1.2	3
2018-03-21	09:59:00	44	C	air	1.2	8.6
2018-03-21	10:59:00	44	C	air	1.2	4.6
2018-03-21	11:59:00	44	C	air	1.2	6.1
2018-03-21	12:59:00	44	C	air	1.2	8.6
2018-03-21	13:59:00	44	C	air	1.2	9.1
2018-03-21	14:59:00	44	C	air	1.2	9.1
2018-03-21	15:59:00	44	C	air	1.2	11.1
2018-03-21	16:59:00	44	C	air	1.2	5.6
2018-03-21	17:59:00	44	C	air	1.2	4.6
2018-03-21	18:59:00	44	C	air	1.2	-0.5
2018-03-21	19:59:00	44	C	air	1.2	-3
2018-03-21	20:59:00	44	C	air	1.2	-3.5
2018-03-21	21:59:00	44	C	air	1.2	-3.5
2018-03-21	22:59:00	44	C	air	1.2	-3
2018-03-21	23:59:00	44	C	air	1.2	-3.5
2018-03-22	00:59:00	44	C	air	1.2	-4.5
2018-03-22	01:59:00	44	C	air	1.2	-5
2018-03-22	02:59:00	44	C	air	1.2	-5
2018-03-22	03:59:00	44	C	air	1.2	-5.5
2018-03-22	04:59:00	44	C	air	1.2	-5.5
2018-03-22	05:59:00	44	C	air	1.2	-6.5
2018-03-22	06:59:00	44	C	air	1.2	-2.5
2018-03-22	07:59:00	44	C	air	1.2	5.6
2018-03-22	08:59:00	44	C	air	1.2	12.1
2018-03-22	09:59:00	44	C	air	1.2	11.1
2018-03-22	10:59:00	44	C	air	1.2	12.6
2018-03-22	11:59:00	44	C	air	1.2	11.1
2018-03-22	12:59:00	44	C	air	1.2	9.1
2018-03-22	13:59:00	44	C	air	1.2	9.1
2018-03-22	14:59:00	44	C	air	1.2	7.6
2018-03-22	15:59:00	44	C	air	1.2	3.6
2018-03-22	16:59:00	44	C	air	1.2	4.1
2018-03-22	17:59:00	44	C	air	1.2	4.1
2018-03-22	18:59:00	44	C	air	1.2	3
2018-03-22	19:59:00	44	C	air	1.2	3
2018-03-22	20:59:00	44	C	air	1.2	2
2018-03-22	21:59:00	44	C	air	1.2	2
2018-03-22	22:59:00	44	C	air	1.2	2
2018-03-22	23:59:00	44	C	air	1.2	2.5
2018-03-23	00:59:00	44	C	air	1.2	2.5
2018-03-23	01:59:00	44	C	air	1.2	2
2018-03-23	02:59:00	44	C	air	1.2	2
2018-03-23	03:59:00	44	C	air	1.2	2
2018-03-23	04:59:00	44	C	air	1.2	2
2018-03-23	05:59:00	44	C	air	1.2	2
2018-03-23	06:59:00	44	C	air	1.2	2.5
2018-03-23	07:59:00	44	C	air	1.2	3.6
2018-03-23	08:59:00	44	C	air	1.2	10.6
2018-03-23	09:59:00	44	C	air	1.2	8.6
2018-03-23	10:59:00	44	C	air	1.2	11.1
2018-03-23	11:59:00	44	C	air	1.2	10.6
2018-03-23	12:59:00	44	C	air	1.2	10.6
2018-03-23	13:59:00	44	C	air	1.2	15.6
2018-03-23	14:59:00	44	C	air	1.2	11.6
2018-03-23	15:59:00	44	C	air	1.2	15.6
2018-03-23	16:59:00	44	C	air	1.2	11.1
2018-03-23	17:59:00	44	C	air	1.2	8.6
2018-03-23	18:59:00	44	C	air	1.2	7.1
2018-03-23	19:59:00	44	C	air	1.2	2.5
2018-03-23	20:59:00	44	C	air	1.2	2
2018-03-23	21:59:00	44	C	air	1.2	0.5
2018-03-23	22:59:00	44	C	air	1.2	-0.5
2018-03-23	23:59:00	44	C	air	1.2	-1.5
2018-03-24	00:59:00	44	C	air	1.2	-2.5
2018-03-24	01:59:00	44	C	air	1.2	-2.5
2018-03-24	02:59:00	44	C	air	1.2	-3
2018-03-24	03:59:00	44	C	air	1.2	-2.5
2018-03-24	04:59:00	44	C	air	1.2	-2.5
2018-03-24	05:59:00	44	C	air	1.2	-3.5
2018-03-24	06:59:00	44	C	air	1.2	-2
2018-03-24	07:59:00	44	C	air	1.2	1
2018-03-24	08:59:00	44	C	air	1.2	11.6
2018-03-24	09:59:00	44	C	air	1.2	13.1
2018-03-24	10:59:00	44	C	air	1.2	12.1
2018-03-24	11:59:00	44	C	air	1.2	13.6
2018-03-24	12:59:00	44	C	air	1.2	15.6
2018-03-24	13:59:00	44	C	air	1.2	18.1
2018-03-24	14:59:00	44	C	air	1.2	20.6
2018-03-24	15:59:00	44	C	air	1.2	19.1
2018-03-24	16:59:00	44	C	air	1.2	17.6
2018-03-24	17:59:00	44	C	air	1.2	15.1
2018-03-24	18:59:00	44	C	air	1.2	5.6
2018-03-24	19:59:00	44	C	air	1.2	3
2018-03-24	20:59:00	44	C	air	1.2	2.5
2018-03-24	21:59:00	44	C	air	1.2	1
2018-03-24	22:59:00	44	C	air	1.2	0.5
2018-03-24	23:59:00	44	C	air	1.2	0
2018-03-25	00:59:00	44	C	air	1.2	-0.5
2018-03-25	01:59:00	44	C	air	1.2	-0.5
2018-03-25	02:59:00	44	C	air	1.2	-0.5
2018-03-25	03:59:00	44	C	air	1.2	-2
2018-03-25	04:59:00	44	C	air	1.2	-2.5
2018-03-25	05:59:00	44	C	air	1.2	-2.5
2018-03-25	06:59:00	44	C	air	1.2	1.5
2018-03-25	07:59:00	44	C	air	1.2	11.6
2018-03-25	08:59:00	44	C	air	1.2	19.1
2018-03-25	09:59:00	44	C	air	1.2	19.1
2018-03-25	10:59:00	44	C	air	1.2	17.6
2018-03-25	11:59:00	44	C	air	1.2	21.1
2018-03-25	12:59:00	44	C	air	1.2	23.6
2018-03-25	13:59:00	44	C	air	1.2	21.1
2018-03-25	14:59:00	44	C	air	1.2	18.1
2018-03-25	15:59:00	44	C	air	1.2	20.6
2018-03-25	16:59:00	44	C	air	1.2	14.6
2018-03-25	17:59:00	44	C	air	1.2	12.6
2018-03-25	18:59:00	44	C	air	1.2	11.6
2018-03-25	19:59:00	44	C	air	1.2	10.6
2018-03-25	20:59:00	44	C	air	1.2	9.6
2018-03-25	21:59:00	44	C	air	1.2	6.6
2018-03-25	22:59:00	44	C	air	1.2	5.1
2018-03-25	23:59:00	44	C	air	1.2	4.1
2018-03-26	00:59:00	44	C	air	1.2	3.6
2018-03-26	01:59:00	44	C	air	1.2	2.5
2018-03-26	02:59:00	44	C	air	1.2	1
2018-03-26	03:59:00	44	C	air	1.2	2.5
2018-03-26	04:59:00	44	C	air	1.2	2
2018-03-26	05:59:00	44	C	air	1.2	-0.5
2018-03-26	06:59:00	44	C	air	1.2	1.5
2018-03-26	07:59:00	44	C	air	1.2	9.6
2018-03-26	08:59:00	44	C	air	1.2	17.6
2018-03-26	09:59:00	44	C	air	1.2	21.6
2018-03-26	10:59:00	44	C	air	1.2	14.6
2018-03-26	11:59:00	44	C	air	1.2	12.1
2018-03-26	12:59:00	44	C	air	1.2	11.6
2018-03-26	13:59:00	44	C	air	1.2	11.1
2018-03-26	14:59:00	44	C	air	1.2	11.1
2018-03-26	15:59:00	44	C	air	1.2	13.6
2018-03-26	16:59:00	44	C	air	1.2	11.1
2018-03-26	17:59:00	44	C	air	1.2	10.1
2018-03-26	18:59:00	44	C	air	1.2	7.6
2018-03-26	19:59:00	44	C	air	1.2	8.1
2018-03-26	20:59:00	44	C	air	1.2	7.1
2018-03-26	21:59:00	44	C	air	1.2	7.1
2018-03-26	22:59:00	44	C	air	1.2	6.1
2018-03-26	23:59:00	44	C	air	1.2	6.1
2018-03-27	00:59:00	44	C	air	1.2	6.1
2018-03-27	01:59:00	44	C	air	1.2	5.6
2018-03-27	02:59:00	44	C	air	1.2	5.6
2018-03-27	03:59:00	44	C	air	1.2	5.1
2018-03-27	04:59:00	44	C	air	1.2	3
2018-03-27	05:59:00	44	C	air	1.2	1
2018-03-27	06:59:00	44	C	air	1.2	2.5
2018-03-27	07:59:00	44	C	air	1.2	6.6
2018-03-27	08:59:00	44	C	air	1.2	14.1
2018-03-27	09:59:00	44	C	air	1.2	18.1
2018-03-27	10:59:00	44	C	air	1.2	18.6
2018-03-27	11:59:00	44	C	air	1.2	17.1
2018-03-27	12:59:00	44	C	air	1.2	15.1
2018-03-27	13:59:00	44	C	air	1.2	14.1
2018-03-27	14:59:00	44	C	air	1.2	13.1
2018-03-27	15:59:00	44	C	air	1.2	11.1
2018-03-27	16:59:00	44	C	air	1.2	9.6
2018-03-27	17:59:00	44	C	air	1.2	8.1
2018-03-27	18:59:00	44	C	air	1.2	7.1
2018-03-27	19:59:00	44	C	air	1.2	7.1
2018-03-27	20:59:00	44	C	air	1.2	7.1
2018-03-27	21:59:00	44	C	air	1.2	7.1
2018-03-27	22:59:00	44	C	air	1.2	6.6
2018-03-27	23:59:00	44	C	air	1.2	6.6
2018-03-28	00:59:00	44	C	air	1.2	9.1
2018-03-28	01:59:00	44	C	air	1.2	9.1
2018-03-28	02:59:00	44	C	air	1.2	8.6
2018-03-28	03:59:00	44	C	air	1.2	9.6
2018-03-28	04:59:00	44	C	air	1.2	9.1
2018-03-28	05:59:00	44	C	air	1.2	9.1
2018-03-28	06:59:00	44	C	air	1.2	8.6
2018-03-28	07:59:00	44	C	air	1.2	9.6
2018-03-28	08:59:00	44	C	air	1.2	10.6
2018-03-28	09:59:00	44	C	air	1.2	12.1
2018-03-28	10:59:00	44	C	air	1.2	13.6
2018-03-28	11:59:00	44	C	air	1.2	15.1
2018-03-28	12:59:00	44	C	air	1.2	15.1
2018-03-28	13:59:00	44	C	air	1.2	13.6
2018-03-28	14:59:00	44	C	air	1.2	13.1
2018-03-28	15:59:00	44	C	air	1.2	12.1
2018-03-28	16:59:00	44	C	air	1.2	12.6
2018-03-28	17:59:00	44	C	air	1.2	12.1
2018-03-28	18:59:00	44	C	air	1.2	11.1
2018-03-28	19:59:00	44	C	air	1.2	9.6
2018-03-28	20:59:00	44	C	air	1.2	9.6
2018-03-28	21:59:00	44	C	air	1.2	10.1
2018-03-28	22:59:00	44	C	air	1.2	8.1
2018-03-28	23:59:00	44	C	air	1.2	7.6
2018-03-29	00:59:00	44	C	air	1.2	6.1
2018-03-29	01:59:00	44	C	air	1.2	5.6
2018-03-29	02:59:00	44	C	air	1.2	5.6
2018-03-29	03:59:00	44	C	air	1.2	5.6
2018-03-29	04:59:00	44	C	air	1.2	5.1
2018-03-29	05:59:00	44	C	air	1.2	5.1
2018-03-29	06:59:00	44	C	air	1.2	5.6
2018-03-29	07:59:00	44	C	air	1.2	10.1
2018-03-29	08:59:00	44	C	air	1.2	13.6
2018-03-29	09:59:00	44	C	air	1.2	9.6
2018-03-29	10:59:00	44	C	air	1.2	8.6
2018-03-29	11:59:00	44	C	air	1.2	8.1
2018-03-29	12:59:00	44	C	air	1.2	7.6
2018-03-29	13:59:00	44	C	air	1.2	9.1
2018-03-29	14:59:00	44	C	air	1.2	10.6
2018-03-29	15:59:00	44	C	air	1.2	15.1
2018-03-29	16:59:00	44	C	air	1.2	9.6
2018-03-29	17:59:00	44	C	air	1.2	14.6
2018-03-29	18:59:00	44	C	air	1.2	6.1
2018-03-29	19:59:00	44	C	air	1.2	3
2018-03-29	20:59:00	44	C	air	1.2	2
2018-03-29	21:59:00	44	C	air	1.2	1.5
2018-03-29	22:59:00	44	C	air	1.2	0.5
2018-03-29	23:59:00	44	C	air	1.2	0
2018-03-30	00:59:00	44	C	air	1.2	-0.5
2018-03-30	01:59:00	44	C	air	1.2	-1
2018-03-30	02:59:00	44	C	air	1.2	0
2018-03-30	03:59:00	44	C	air	1.2	1
2018-03-30	04:59:00	44	C	air	1.2	0
2018-03-30	05:59:00	44	C	air	1.2	0
2018-03-30	06:59:00	44	C	air	1.2	6.6
2018-03-30	07:59:00	44	C	air	1.2	7.1
2018-03-30	08:59:00	44	C	air	1.2	18.6
2018-03-30	09:59:00	44	C	air	1.2	11.1
2018-03-30	10:59:00	44	C	air	1.2	10.6
2018-03-30	11:59:00	44	C	air	1.2	17.1
2018-03-30	12:59:00	44	C	air	1.2	18.6
2018-03-30	13:59:00	44	C	air	1.2	14.6
2018-03-30	14:59:00	44	C	air	1.2	11.6
2018-03-30	15:59:00	44	C	air	1.2	7.6
2018-03-30	16:59:00	44	C	air	1.2	7.1
2018-03-30	17:59:00	44	C	air	1.2	6.1
2018-03-30	18:59:00	44	C	air	1.2	5.6
2018-03-30	19:59:00	44	C	air	1.2	5.6
2018-03-30	20:59:00	44	C	air	1.2	5.1
2018-03-30	21:59:00	44	C	air	1.2	5.1
2018-03-30	22:59:00	44	C	air	1.2	4.6
2018-03-30	23:59:00	44	C	air	1.2	4.6
2018-03-31	00:59:00	44	C	air	1.2	4.6
2018-03-31	01:59:00	44	C	air	1.2	4.6
2018-03-31	02:59:00	44	C	air	1.2	5.1
2018-03-31	03:59:00	44	C	air	1.2	5.1
2018-03-31	04:59:00	44	C	air	1.2	4.6
2018-03-31	05:59:00	44	C	air	1.2	4.6
2018-03-31	06:59:00	44	C	air	1.2	4.6
2018-03-31	07:59:00	44	C	air	1.2	6.1
2018-03-31	08:59:00	44	C	air	1.2	7.6
2018-03-31	09:59:00	44	C	air	1.2	10.1
2018-03-31	10:59:00	44	C	air	1.2	12.1
2018-03-31	11:59:00	44	C	air	1.2	12.1
2018-03-31	12:59:00	44	C	air	1.2	11.1
2018-03-31	13:59:00	44	C	air	1.2	12.6
2018-03-31	14:59:00	44	C	air	1.2	16.1
2018-03-31	15:59:00	44	C	air	1.2	12.1
2018-03-31	16:59:00	44	C	air	1.2	12.1
2018-03-31	17:59:00	44	C	air	1.2	10.1
2018-03-31	18:59:00	44	C	air	1.2	6.6
2018-03-31	19:59:00	44	C	air	1.2	4.6
2018-03-31	20:59:00	44	C	air	1.2	2.5
2018-03-31	21:59:00	44	C	air	1.2	2
2018-03-31	22:59:00	44	C	air	1.2	3
2018-03-31	23:59:00	44	C	air	1.2	2.5
2018-04-01	00:59:00	44	C	air	1.2	6.6
2018-04-01	01:59:00	44	C	air	1.2	6.6
2018-04-01	02:59:00	44	C	air	1.2	5.6
2018-04-01	03:59:00	44	C	air	1.2	4.6
2018-04-01	04:59:00	44	C	air	1.2	5.6
2018-04-01	05:59:00	44	C	air	1.2	5.1
2018-04-01	06:59:00	44	C	air	1.2	6.1
2018-04-01	07:59:00	44	C	air	1.2	7.1
2018-04-01	08:59:00	44	C	air	1.2	6.1
2018-04-01	09:59:00	44	C	air	1.2	8.1
2018-04-01	10:59:00	44	C	air	1.2	7.1
2018-04-01	11:59:00	44	C	air	1.2	9.1
2018-04-01	12:59:00	44	C	air	1.2	11.6
2018-04-01	13:59:00	44	C	air	1.2	7.6
2018-04-01	14:59:00	44	C	air	1.2	9.6
2018-04-01	15:59:00	44	C	air	1.2	9.1
2018-04-01	16:59:00	44	C	air	1.2	12.1
2018-04-01	17:59:00	44	C	air	1.2	8.6
2018-04-01	18:59:00	44	C	air	1.2	6.6
2018-04-01	19:59:00	44	C	air	1.2	4.6
2018-04-01	20:59:00	44	C	air	1.2	1.5
2018-04-01	21:59:00	44	C	air	1.2	0
2018-04-01	22:59:00	44	C	air	1.2	-0.5
2018-04-01	23:59:00	44	C	air	1.2	-1
2018-04-02	00:59:00	44	C	air	1.2	-1.5
2018-04-02	01:59:00	44	C	air	1.2	-2
2018-04-02	02:59:00	44	C	air	1.2	-2.5
2018-04-02	03:59:00	44	C	air	1.2	-2.5
2018-04-02	04:59:00	44	C	air	1.2	-3.5
2018-04-02	05:59:00	44	C	air	1.2	-2.5
2018-04-02	06:59:00	44	C	air	1.2	5.1
2018-04-02	07:59:00	44	C	air	1.2	5.1
2018-04-02	08:59:00	44	C	air	1.2	11.6
2018-04-02	09:59:00	44	C	air	1.2	16.6
2018-04-02	10:59:00	44	C	air	1.2	15.1
2018-04-02	11:59:00	44	C	air	1.2	18.6
2018-04-02	12:59:00	44	C	air	1.2	18.1
2018-04-02	13:59:00	44	C	air	1.2	18.1
2018-04-02	14:59:00	44	C	air	1.2	16.6
2018-04-02	15:59:00	44	C	air	1.2	15.6
2018-04-02	16:59:00	44	C	air	1.2	14.6
2018-04-02	17:59:00	44	C	air	1.2	13.6
2018-04-02	18:59:00	44	C	air	1.2	12.1
2018-04-02	19:59:00	44	C	air	1.2	9.6
2018-04-02	20:59:00	44	C	air	1.2	8.6
2018-04-02	21:59:00	44	C	air	1.2	7.1
2018-04-02	22:59:00	44	C	air	1.2	8.1
2018-04-02	23:59:00	44	C	air	1.2	8.1
2018-04-03	00:59:00	44	C	air	1.2	8.1
2018-04-03	01:59:00	44	C	air	1.2	6.6
2018-04-03	02:59:00	44	C	air	1.2	5.6
2018-04-03	03:59:00	44	C	air	1.2	6.1
2018-04-03	04:59:00	44	C	air	1.2	5.1
2018-04-03	05:59:00	44	C	air	1.2	4.6
2018-04-03	06:59:00	44	C	air	1.2	10.1
2018-04-03	07:59:00	44	C	air	1.2	18.6
2018-04-03	08:59:00	44	C	air	1.2	18.1
2018-04-03	09:59:00	44	C	air	1.2	25.6
2018-04-03	10:59:00	44	C	air	1.2	23.6
2018-04-03	11:59:00	44	C	air	1.2	21.1
2018-04-03	12:59:00	44	C	air	1.2	24.6
2018-04-03	13:59:00	44	C	air	1.2	22.6
2018-04-03	14:59:00	44	C	air	1.2	24.6
2018-04-03	15:59:00	44	C	air	1.2	20.6
2018-04-03	16:59:00	44	C	air	1.2	19.1
2018-04-03	17:59:00	44	C	air	1.2	17.6
2018-04-03	18:59:00	44	C	air	1.2	14.6
2018-04-03	19:59:00	44	C	air	1.2	12.6
2018-04-03	20:59:00	44	C	air	1.2	12.6
2018-04-03	21:59:00	44	C	air	1.2	12.1
2018-04-03	22:59:00	44	C	air	1.2	9.6
2018-04-03	23:59:00	44	C	air	1.2	9.1
2018-04-04	00:59:00	44	C	air	1.2	8.6
2018-04-04	01:59:00	44	C	air	1.2	9.1
2018-04-04	02:59:00	44	C	air	1.2	8.1
2018-04-04	03:59:00	44	C	air	1.2	7.6
2018-04-04	04:59:00	44	C	air	1.2	6.6
2018-04-04	05:59:00	44	C	air	1.2	6.1
2018-04-04	06:59:00	44	C	air	1.2	13.6
2018-04-04	07:59:00	44	C	air	1.2	12.1
2018-04-04	08:59:00	44	C	air	1.2	24.6
2018-04-04	09:59:00	44	C	air	1.2	25.6
2018-04-04	10:59:00	44	C	air	1.2	25.6
2018-04-04	11:59:00	44	C	air	1.2	16.1
2018-04-04	12:59:00	44	C	air	1.2	15.6
2018-04-04	13:59:00	44	C	air	1.2	10.1
2018-04-04	14:59:00	44	C	air	1.2	9.1
2018-04-04	15:59:00	44	C	air	1.2	12.1
2018-04-04	16:59:00	44	C	air	1.2	11.6
2018-04-04	17:59:00	44	C	air	1.2	11.6
2018-04-04	18:59:00	44	C	air	1.2	11.6
2018-04-04	19:59:00	44	C	air	1.2	12.1
2018-04-04	20:59:00	44	C	air	1.2	10.1
2018-04-04	21:59:00	44	C	air	1.2	10.1
2018-04-04	22:59:00	44	C	air	1.2	10.6
2018-04-04	23:59:00	44	C	air	1.2	10.6
2018-04-05	00:59:00	44	C	air	1.2	10.1
2018-04-05	01:59:00	44	C	air	1.2	11.1
2018-04-05	02:59:00	44	C	air	1.2	9.6
2018-04-05	03:59:00	44	C	air	1.2	7.6
2018-04-05	04:59:00	44	C	air	1.2	9.6
2018-04-05	05:59:00	44	C	air	1.2	8.6
2018-04-05	06:59:00	44	C	air	1.2	8.6
2018-04-05	07:59:00	44	C	air	1.2	16.6
2018-04-05	08:59:00	44	C	air	1.2	16.1
2018-04-05	09:59:00	44	C	air	1.2	13.6
2018-04-05	10:59:00	44	C	air	1.2	13.6
2018-04-05	11:59:00	44	C	air	1.2	12.6
2018-04-05	12:59:00	44	C	air	1.2	13.6
2018-04-05	13:59:00	44	C	air	1.2	11.6
2018-04-05	14:59:00	44	C	air	1.2	15.6
2018-04-05	15:59:00	44	C	air	1.2	17.1
2018-04-05	16:59:00	44	C	air	1.2	12.6
2018-04-05	17:59:00	44	C	air	1.2	10.6
2018-04-05	18:59:00	44	C	air	1.2	8.1
2018-04-05	19:59:00	44	C	air	1.2	5.1
2018-04-05	20:59:00	44	C	air	1.2	4.6
2018-04-05	21:59:00	44	C	air	1.2	3.6
2018-04-05	22:59:00	44	C	air	1.2	2.5
2018-04-05	23:59:00	44	C	air	1.2	1.5
2018-04-06	00:59:00	44	C	air	1.2	1
2018-04-06	01:59:00	44	C	air	1.2	0.5
2018-04-06	02:59:00	44	C	air	1.2	-0.5
2018-04-06	03:59:00	44	C	air	1.2	-0.5
2018-04-06	04:59:00	44	C	air	1.2	-1
2018-04-06	05:59:00	44	C	air	1.2	-1.5
2018-04-06	06:59:00	44	C	air	1.2	8.1
2018-04-06	07:59:00	44	C	air	1.2	17.1
2018-04-06	08:59:00	44	C	air	1.2	15.6
2018-04-06	09:59:00	44	C	air	1.2	15.1
2018-04-06	10:59:00	44	C	air	1.2	17.1
2018-04-06	11:59:00	44	C	air	1.2	18.6
2018-04-06	12:59:00	44	C	air	1.2	20.1
2018-04-06	13:59:00	44	C	air	1.2	21.1
2018-04-06	14:59:00	44	C	air	1.2	24.1
2018-04-06	15:59:00	44	C	air	1.2	24.6
2018-04-06	16:59:00	44	C	air	1.2	24.1
2018-04-06	17:59:00	44	C	air	1.2	23.1
2018-04-06	18:59:00	44	C	air	1.2	15.1
2018-04-06	19:59:00	44	C	air	1.2	10.6
2018-04-06	20:59:00	44	C	air	1.2	7.6
2018-04-06	21:59:00	44	C	air	1.2	5.6
2018-04-06	22:59:00	44	C	air	1.2	5.1
2018-04-06	23:59:00	44	C	air	1.2	3.6
2018-04-07	00:59:00	44	C	air	1.2	2.5
2018-04-07	01:59:00	44	C	air	1.2	2
2018-04-07	02:59:00	44	C	air	1.2	1
2018-04-07	03:59:00	44	C	air	1.2	2
2018-04-07	04:59:00	44	C	air	1.2	0.5
2018-04-07	05:59:00	44	C	air	1.2	0.5
2018-04-07	06:59:00	44	C	air	1.2	11.1
2018-04-07	07:59:00	44	C	air	1.2	19.6
2018-04-07	08:59:00	44	C	air	1.2	24.1
2018-04-07	09:59:00	44	C	air	1.2	25.6
2018-04-07	10:59:00	44	C	air	1.2	24.6
2018-04-07	11:59:00	44	C	air	1.2	25.6
2018-04-07	12:59:00	44	C	air	1.2	27.1
2018-04-07	13:59:00	44	C	air	1.2	28.1
2018-04-07	14:59:00	44	C	air	1.2	31.1
2018-04-07	15:59:00	44	C	air	1.2	32.1
2018-04-07	16:59:00	44	C	air	1.2	27.6
2018-04-07	17:59:00	44	C	air	1.2	23.6
2018-04-07	18:59:00	44	C	air	1.2	13.6
2018-04-07	19:59:00	44	C	air	1.2	11.6
2018-04-07	20:59:00	44	C	air	1.2	10.1
2018-04-07	21:59:00	44	C	air	1.2	9.6
2018-04-07	22:59:00	44	C	air	1.2	8.6
2018-04-07	23:59:00	44	C	air	1.2	6.6
2018-04-08	00:59:00	44	C	air	1.2	8.1
2018-04-08	01:59:00	44	C	air	1.2	7.6
2018-04-08	02:59:00	44	C	air	1.2	6.6
2018-04-08	03:59:00	44	C	air	1.2	5.6
2018-04-08	04:59:00	44	C	air	1.2	5.1
2018-04-08	05:59:00	44	C	air	1.2	5.1
2018-04-08	06:59:00	44	C	air	1.2	10.6
2018-04-08	07:59:00	44	C	air	1.2	21.1
2018-04-08	08:59:00	44	C	air	1.2	24.6
2018-04-08	09:59:00	44	C	air	1.2	24.6
2018-04-08	10:59:00	44	C	air	1.2	25.1
2018-04-08	11:59:00	44	C	air	1.2	24.6
2018-04-08	12:59:00	44	C	air	1.2	27.1
2018-04-08	13:59:00	44	C	air	1.2	28.6
2018-04-08	14:59:00	44	C	air	1.2	28.1
2018-04-08	15:59:00	44	C	air	1.2	30.6
2018-04-08	16:59:00	44	C	air	1.2	24.1
2018-04-08	17:59:00	44	C	air	1.2	21.1
2018-04-08	18:59:00	44	C	air	1.2	16.1
2018-04-08	19:59:00	44	C	air	1.2	16.1
2018-04-08	20:59:00	44	C	air	1.2	15.6
2018-04-08	21:59:00	44	C	air	1.2	13.1
2018-04-08	22:59:00	44	C	air	1.2	10.1
2018-04-08	23:59:00	44	C	air	1.2	8.6
2018-04-09	00:59:00	44	C	air	1.2	9.1
2018-04-09	01:59:00	44	C	air	1.2	8.1
2018-04-09	02:59:00	44	C	air	1.2	7.6
2018-04-09	03:59:00	44	C	air	1.2	8.1
2018-04-09	04:59:00	44	C	air	1.2	8.6
2018-04-09	05:59:00	44	C	air	1.2	9.1
2018-04-09	06:59:00	44	C	air	1.2	10.1
2018-04-09	07:59:00	44	C	air	1.2	13.6
2018-04-09	08:59:00	44	C	air	1.2	18.1
2018-04-09	09:59:00	44	C	air	1.2	21.1
2018-04-09	10:59:00	44	C	air	1.2	24.6
2018-04-09	11:59:00	44	C	air	1.2	28.1
2018-04-09	12:59:00	44	C	air	1.2	26.6
2018-04-09	13:59:00	44	C	air	1.2	21.6
2018-04-09	14:59:00	44	C	air	1.2	19.6
2018-04-09	15:59:00	44	C	air	1.2	19.6
2018-04-09	16:59:00	44	C	air	1.2	16.1
2018-04-09	17:59:00	44	C	air	1.2	15.1
2018-04-09	18:59:00	44	C	air	1.2	14.6
2018-04-09	19:59:00	44	C	air	1.2	14.1
2018-04-09	20:59:00	44	C	air	1.2	12.6
2018-04-09	21:59:00	44	C	air	1.2	12.1
2018-04-09	22:59:00	44	C	air	1.2	11.1
2018-04-09	23:59:00	44	C	air	1.2	10.6
2018-04-10	00:59:00	44	C	air	1.2	9.6
2018-04-10	01:59:00	44	C	air	1.2	8.6
2018-04-10	02:59:00	44	C	air	1.2	7.6
2018-04-10	03:59:00	44	C	air	1.2	8.1
2018-04-10	04:59:00	44	C	air	1.2	9.1
2018-04-10	05:59:00	44	C	air	1.2	8.1
2018-04-10	06:59:00	44	C	air	1.2	16.1
2018-04-10	07:59:00	44	C	air	1.2	12.1
2018-04-10	08:59:00	44	C	air	1.2	13.1
2018-04-10	09:59:00	44	C	air	1.2	14.6
2018-04-10	10:59:00	44	C	air	1.2	10.6
2018-04-10	11:59:00	44	C	air	1.2	9.6
2018-04-10	12:59:00	44	C	air	1.2	10.1
2018-04-10	13:59:00	44	C	air	1.2	10.6
2018-04-10	14:59:00	44	C	air	1.2	11.1
2018-04-10	15:59:00	44	C	air	1.2	12.6
2018-04-10	16:59:00	44	C	air	1.2	20.6
2018-04-10	17:59:00	44	C	air	1.2	14.1
2018-04-10	18:59:00	44	C	air	1.2	9.6
2018-04-10	19:59:00	44	C	air	1.2	4.6
2018-04-10	20:59:00	44	C	air	1.2	3.6
2018-04-10	21:59:00	44	C	air	1.2	2.5
2018-04-10	22:59:00	44	C	air	1.2	2
2018-04-10	23:59:00	44	C	air	1.2	0.5
2018-04-11	00:59:00	44	C	air	1.2	1
2018-04-11	01:59:00	44	C	air	1.2	0
2018-04-11	02:59:00	44	C	air	1.2	0.5
2018-04-11	03:59:00	44	C	air	1.2	-1
2018-04-11	04:59:00	44	C	air	1.2	-1
2018-04-11	05:59:00	44	C	air	1.2	-0.5
2018-04-11	06:59:00	44	C	air	1.2	10.6
2018-04-11	07:59:00	44	C	air	1.2	17.6
2018-04-11	08:59:00	44	C	air	1.2	22.1
2018-04-11	09:59:00	44	C	air	1.2	21.6
2018-04-11	10:59:00	44	C	air	1.2	21.6
2018-04-11	11:59:00	44	C	air	1.2	19.1
2018-04-11	12:59:00	44	C	air	1.2	21.6
2018-04-11	13:59:00	44	C	air	1.2	22.1
2018-04-11	14:59:00	44	C	air	1.2	22.1
2018-04-11	15:59:00	44	C	air	1.2	20.6
2018-04-11	16:59:00	44	C	air	1.2	20.6
2018-04-11	17:59:00	44	C	air	1.2	19.1
2018-04-11	18:59:00	44	C	air	1.2	15.6
2018-04-11	19:59:00	44	C	air	1.2	14.1
2018-04-11	20:59:00	44	C	air	1.2	11.6
2018-04-11	21:59:00	44	C	air	1.2	9.1
2018-04-11	22:59:00	44	C	air	1.2	9.1
2018-04-11	23:59:00	44	C	air	1.2	8.6
2018-04-12	00:59:00	44	C	air	1.2	7.6
2018-04-12	01:59:00	44	C	air	1.2	6.1
2018-04-12	02:59:00	44	C	air	1.2	7.1
2018-04-12	03:59:00	44	C	air	1.2	7.6
2018-04-12	04:59:00	44	C	air	1.2	7.1
2018-04-12	05:59:00	44	C	air	1.2	6.1
2018-04-12	06:59:00	44	C	air	1.2	8.1
2018-04-12	07:59:00	44	C	air	1.2	25.6
2018-04-12	08:59:00	44	C	air	1.2	15.6
2018-04-12	09:59:00	44	C	air	1.2	16.1
2018-04-12	10:59:00	44	C	air	1.2	21.6
2018-04-12	11:59:00	44	C	air	1.2	22.1
2018-04-12	12:59:00	44	C	air	1.2	24.6
2018-04-12	13:59:00	44	C	air	1.2	24.6
2018-04-12	14:59:00	44	C	air	1.2	26.1
2018-04-12	15:59:00	44	C	air	1.2	28.1
2018-04-12	16:59:00	44	C	air	1.2	26.6
2018-04-12	17:59:00	44	C	air	1.2	18.6
2018-04-12	18:59:00	44	C	air	1.2	13.6
2018-04-12	19:59:00	44	C	air	1.2	9.6
2018-04-12	20:59:00	44	C	air	1.2	8.6
2018-04-12	21:59:00	44	C	air	1.2	7.1
2018-04-12	22:59:00	44	C	air	1.2	7.6
2018-04-12	23:59:00	44	C	air	1.2	6.1
2018-04-13	00:59:00	44	C	air	1.2	7.1
2018-04-13	01:59:00	44	C	air	1.2	6.6
2018-04-13	02:59:00	44	C	air	1.2	7.1
2018-04-13	03:59:00	44	C	air	1.2	10.6
2018-04-13	04:59:00	44	C	air	1.2	11.1
2018-04-13	05:59:00	44	C	air	1.2	10.6
2018-04-13	06:59:00	44	C	air	1.2	10.6
2018-04-13	07:59:00	44	C	air	1.2	10.1
2018-04-13	08:59:00	44	C	air	1.2	11.6
2018-04-13	09:59:00	44	C	air	1.2	17.6
2018-04-13	10:59:00	44	C	air	1.2	16.6
2018-04-13	11:59:00	44	C	air	1.2	14.6
2018-04-13	12:59:00	44	C	air	1.2	17.6
2018-04-13	13:59:00	44	C	air	1.2	15.6
2018-04-13	14:59:00	44	C	air	1.2	21.1
2018-04-13	15:59:00	44	C	air	1.2	21.1
2018-04-13	16:59:00	44	C	air	1.2	16.1
2018-04-13	17:59:00	44	C	air	1.2	20.1
2018-04-13	18:59:00	44	C	air	1.2	15.6
2018-04-13	19:59:00	44	C	air	1.2	10.1
2018-04-13	20:59:00	44	C	air	1.2	8.6
2018-04-13	21:59:00	44	C	air	1.2	6.6
2018-04-13	22:59:00	44	C	air	1.2	5.6
2018-04-13	23:59:00	44	C	air	1.2	4.1
2018-04-14	00:59:00	44	C	air	1.2	3.6
2018-04-14	01:59:00	44	C	air	1.2	3
2018-04-14	02:59:00	44	C	air	1.2	2.5
2018-04-14	03:59:00	44	C	air	1.2	2
2018-04-14	04:59:00	44	C	air	1.2	2.5
2018-04-14	05:59:00	44	C	air	1.2	3.6
2018-04-14	06:59:00	44	C	air	1.2	6.6
2018-04-14	07:59:00	44	C	air	1.2	11.1
2018-04-14	08:59:00	44	C	air	1.2	16.6
2018-04-14	09:59:00	44	C	air	1.2	24.1
2018-04-14	10:59:00	44	C	air	1.2	23.1
2018-04-14	11:59:00	44	C	air	1.2	24.6
2018-04-14	12:59:00	44	C	air	1.2	25.6
2018-04-14	13:59:00	44	C	air	1.2	24.6
2018-04-14	14:59:00	44	C	air	1.2	24.1
2018-04-14	15:59:00	44	C	air	1.2	24.6
2018-04-14	16:59:00	44	C	air	1.2	24.6
2018-04-14	17:59:00	44	C	air	1.2	22.1
2018-04-14	18:59:00	44	C	air	1.2	16.1
2018-04-14	19:59:00	44	C	air	1.2	13.1
2018-04-14	20:59:00	44	C	air	1.2	12.6
2018-04-14	21:59:00	44	C	air	1.2	13.1
2018-04-14	22:59:00	44	C	air	1.2	13.1
2018-04-14	23:59:00	44	C	air	1.2	13.1
2018-04-15	00:59:00	44	C	air	1.2	12.1
2018-04-15	01:59:00	44	C	air	1.2	12.1
2018-04-15	02:59:00	44	C	air	1.2	10.6
2018-04-15	03:59:00	44	C	air	1.2	8.6
2018-04-15	04:59:00	44	C	air	1.2	6.6
2018-04-15	05:59:00	44	C	air	1.2	5.6
2018-04-15	06:59:00	44	C	air	1.2	11.6
2018-04-15	07:59:00	44	C	air	1.2	20.6
2018-04-15	08:59:00	44	C	air	1.2	23.1
2018-04-15	09:59:00	44	C	air	1.2	26.1
2018-04-15	10:59:00	44	C	air	1.2	21.1
2018-04-15	11:59:00	44	C	air	1.2	25.1
2018-04-15	12:59:00	44	C	air	1.2	22.6
2018-04-15	13:59:00	44	C	air	1.2	25.6
2018-04-15	14:59:00	44	C	air	1.2	25.6
2018-04-15	15:59:00	44	C	air	1.2	26.6
2018-04-15	16:59:00	44	C	air	1.2	21.6
2018-04-15	17:59:00	44	C	air	1.2	20.6
2018-04-15	18:59:00	44	C	air	1.2	17.6
2018-04-15	19:59:00	44	C	air	1.2	14.6
2018-04-15	20:59:00	44	C	air	1.2	13.6
2018-04-15	21:59:00	44	C	air	1.2	13.1
2018-04-15	22:59:00	44	C	air	1.2	12.6
2018-04-15	23:59:00	44	C	air	1.2	13.1
2018-04-16	00:59:00	44	C	air	1.2	12.6
2018-04-16	01:59:00	44	C	air	1.2	12.6
2018-04-16	02:59:00	44	C	air	1.2	11.1
2018-04-16	03:59:00	44	C	air	1.2	10.6
2018-04-16	04:59:00	44	C	air	1.2	10.1
2018-04-16	05:59:00	44	C	air	1.2	9.6
2018-04-16	06:59:00	44	C	air	1.2	13.6
2018-04-16	07:59:00	44	C	air	1.2	28.1
2018-04-16	08:59:00	44	C	air	1.2	25.6
2018-04-16	09:59:00	44	C	air	1.2	26.1
2018-04-16	10:59:00	44	C	air	1.2	22.1
2018-04-16	11:59:00	44	C	air	1.2	26.1
2018-04-16	12:59:00	44	C	air	1.2	21.1
2018-04-16	13:59:00	44	C	air	1.2	22.1
2018-04-16	14:59:00	44	C	air	1.2	25.1
2018-04-16	15:59:00	44	C	air	1.2	21.6
2018-04-16	16:59:00	44	C	air	1.2	18.6
2018-04-16	17:59:00	44	C	air	1.2	19.1
2018-04-16	18:59:00	44	C	air	1.2	14.6
2018-04-16	19:59:00	44	C	air	1.2	13.1
2018-04-16	20:59:00	44	C	air	1.2	14.1
2018-04-16	21:59:00	44	C	air	1.2	13.6
2018-04-16	22:59:00	44	C	air	1.2	13.6
2018-04-16	23:59:00	44	C	air	1.2	11.6
2018-04-17	00:59:00	44	C	air	1.2	11.6
2018-04-17	01:59:00	44	C	air	1.2	11.1
2018-04-17	02:59:00	44	C	air	1.2	8.6
2018-04-17	03:59:00	44	C	air	1.2	6.6
2018-04-17	04:59:00	44	C	air	1.2	5.6
2018-04-17	05:59:00	44	C	air	1.2	6.1
2018-04-17	06:59:00	44	C	air	1.2	17.6
2018-04-17	07:59:00	44	C	air	1.2	23.1
2018-04-17	08:59:00	44	C	air	1.2	25.6
2018-04-17	09:59:00	44	C	air	1.2	26.1
2018-04-17	10:59:00	44	C	air	1.2	25.1
2018-04-17	11:59:00	44	C	air	1.2	25.6
2018-04-17	12:59:00	44	C	air	1.2	25.1
2018-04-17	13:59:00	44	C	air	1.2	26.6
2018-04-17	14:59:00	44	C	air	1.2	28.6
2018-04-17	15:59:00	44	C	air	1.2	30.1
2018-04-17	16:59:00	44	C	air	1.2	29.6
2018-04-17	17:59:00	44	C	air	1.2	25.1
2018-04-17	18:59:00	44	C	air	1.2	21.1
2018-04-17	19:59:00	44	C	air	1.2	13.1
2018-04-17	20:59:00	44	C	air	1.2	11.1
2018-04-17	21:59:00	44	C	air	1.2	9.6
2018-04-17	22:59:00	44	C	air	1.2	8.6
2018-04-17	23:59:00	44	C	air	1.2	7.6
2018-04-18	00:59:00	44	C	air	1.2	6.6
2018-04-18	01:59:00	44	C	air	1.2	5.6
2018-04-18	02:59:00	44	C	air	1.2	5.1
2018-04-18	03:59:00	44	C	air	1.2	4.6
2018-04-18	04:59:00	44	C	air	1.2	4.1
2018-04-18	05:59:00	44	C	air	1.2	4.6
2018-04-18	06:59:00	44	C	air	1.2	18.1
2018-04-18	07:59:00	44	C	air	1.2	25.1
2018-04-18	08:59:00	44	C	air	1.2	28.1
2018-04-18	09:59:00	44	C	air	1.2	28.6
2018-04-18	10:59:00	44	C	air	1.2	26.6
2018-04-18	11:59:00	44	C	air	1.2	27.6
2018-04-18	12:59:00	44	C	air	1.2	27.6
2018-04-18	13:59:00	44	C	air	1.2	27.1
2018-04-18	14:59:00	44	C	air	1.2	29.6
2018-04-18	15:59:00	44	C	air	1.2	28.6
2018-04-18	16:59:00	44	C	air	1.2	27.6
2018-04-18	17:59:00	44	C	air	1.2	28.1
2018-04-18	18:59:00	44	C	air	1.2	21.6
2018-04-18	19:59:00	44	C	air	1.2	13.1
2018-04-18	20:59:00	44	C	air	1.2	10.6
2018-04-18	21:59:00	44	C	air	1.2	9.6
2018-04-18	22:59:00	44	C	air	1.2	9.1
2018-04-18	23:59:00	44	C	air	1.2	9.1
2018-04-19	00:59:00	44	C	air	1.2	9.1
2018-04-19	01:59:00	44	C	air	1.2	7.1
2018-04-19	02:59:00	44	C	air	1.2	5.6
2018-04-19	03:59:00	44	C	air	1.2	5.1
2018-04-19	04:59:00	44	C	air	1.2	5.1
2018-04-19	05:59:00	44	C	air	1.2	6.6
2018-04-19	06:59:00	44	C	air	1.2	18.6
2018-04-19	07:59:00	44	C	air	1.2	24.1
2018-04-19	08:59:00	44	C	air	1.2	24.1
2018-04-19	09:59:00	44	C	air	1.2	25.6
2018-04-19	10:59:00	44	C	air	1.2	27.6
2018-04-19	11:59:00	44	C	air	1.2	28.6
2018-04-19	12:59:00	44	C	air	1.2	30.1
2018-04-19	13:59:00	44	C	air	1.2	31.1
2018-04-19	14:59:00	44	C	air	1.2	32.1
2018-04-19	15:59:00	44	C	air	1.2	34.6
2018-04-19	16:59:00	44	C	air	1.2	37.6
2018-04-19	17:59:00	44	C	air	1.2	34.1
2018-04-19	18:59:00	44	C	air	1.2	26.1
2018-04-19	19:59:00	44	C	air	1.2	14.6
2018-04-19	20:59:00	44	C	air	1.2	12.6
2018-04-19	21:59:00	44	C	air	1.2	11.1
2018-04-19	22:59:00	44	C	air	1.2	9.1
2018-04-19	23:59:00	44	C	air	1.2	8.1
2018-04-20	00:59:00	44	C	air	1.2	7.1
2018-04-20	01:59:00	44	C	air	1.2	6.6
2018-04-20	02:59:00	44	C	air	1.2	6.1
2018-04-20	03:59:00	44	C	air	1.2	6.1
2018-04-20	04:59:00	44	C	air	1.2	5.1
2018-04-20	05:59:00	44	C	air	1.2	6.1
2018-04-20	06:59:00	44	C	air	1.2	16.6
2018-04-20	07:59:00	44	C	air	1.2	25.1
2018-04-20	08:59:00	44	C	air	1.2	26.1
2018-04-20	09:59:00	44	C	air	1.2	26.6
2018-04-20	10:59:00	44	C	air	1.2	30.6
2018-04-20	11:59:00	44	C	air	1.2	29.6
2018-04-20	12:59:00	44	C	air	1.2	31.1
2018-04-20	13:59:00	44	C	air	1.2	32.6
2018-04-20	14:59:00	44	C	air	1.2	33.6
2018-04-20	15:59:00	44	C	air	1.2	36.1
2018-04-20	16:59:00	44	C	air	1.2	34.6
2018-04-20	17:59:00	44	C	air	1.2	34.6
2018-04-20	18:59:00	44	C	air	1.2	24.6
2018-04-20	19:59:00	44	C	air	1.2	15.1
2018-04-20	20:59:00	44	C	air	1.2	14.1
2018-04-20	21:59:00	44	C	air	1.2	12.6
2018-04-20	22:59:00	44	C	air	1.2	10.6
2018-04-20	23:59:00	44	C	air	1.2	10.1
2018-04-21	00:59:00	44	C	air	1.2	8.6
2018-04-21	01:59:00	44	C	air	1.2	7.6
2018-04-21	02:59:00	44	C	air	1.2	7.6
2018-04-21	03:59:00	44	C	air	1.2	6.6
2018-04-21	04:59:00	44	C	air	1.2	6.1
2018-04-21	05:59:00	44	C	air	1.2	7.6
2018-04-21	06:59:00	44	C	air	1.2	17.6
2018-04-21	07:59:00	44	C	air	1.2	25.6
2018-04-21	08:59:00	44	C	air	1.2	27.6
2018-04-21	09:59:00	44	C	air	1.2	27.6
2018-04-21	10:59:00	44	C	air	1.2	29.1
2018-04-21	11:59:00	44	C	air	1.2	30.1
2018-04-21	12:59:00	44	C	air	1.2	32.1
2018-04-21	13:59:00	44	C	air	1.2	33.6
2018-04-21	14:59:00	44	C	air	1.2	33.6
2018-04-21	15:59:00	44	C	air	1.2	36.6
2018-04-21	16:59:00	44	C	air	1.2	37.1
2018-04-21	17:59:00	44	C	air	1.2	36.1
2018-04-21	18:59:00	44	C	air	1.2	25.6
2018-04-21	19:59:00	44	C	air	1.2	15.6
2018-04-21	20:59:00	44	C	air	1.2	14.6
2018-04-21	21:59:00	44	C	air	1.2	12.6
2018-04-21	22:59:00	44	C	air	1.2	11.1
2018-04-21	23:59:00	44	C	air	1.2	9.6
2018-04-22	00:59:00	44	C	air	1.2	9.1
2018-04-22	01:59:00	44	C	air	1.2	8.6
2018-04-22	02:59:00	44	C	air	1.2	7.6
2018-04-22	03:59:00	44	C	air	1.2	7.6
2018-04-22	04:59:00	44	C	air	1.2	6.6
2018-04-22	05:59:00	44	C	air	1.2	8.1
2018-04-22	06:59:00	44	C	air	1.2	19.6
2018-04-22	07:59:00	44	C	air	1.2	22.6
2018-04-22	08:59:00	44	C	air	1.2	28.1
2018-04-22	09:59:00	44	C	air	1.2	28.6
2018-04-22	10:59:00	44	C	air	1.2	30.6
2018-04-22	11:59:00	44	C	air	1.2	32.1
2018-04-22	12:59:00	44	C	air	1.2	31.6
2018-04-22	13:59:00	44	C	air	1.2	29.1
2018-04-22	14:59:00	44	C	air	1.2	32.6
2018-04-22	15:59:00	44	C	air	1.2	29.6
2018-04-22	16:59:00	44	C	air	1.2	36.6
2018-04-22	17:59:00	44	C	air	1.2	30.6
2018-04-22	18:59:00	44	C	air	1.2	22.1
2018-04-22	19:59:00	44	C	air	1.2	15.6
2018-04-22	20:59:00	44	C	air	1.2	14.1
2018-04-22	21:59:00	44	C	air	1.2	12.1
2018-04-22	22:59:00	44	C	air	1.2	11.6
2018-04-22	23:59:00	44	C	air	1.2	10.6
2018-04-23	00:59:00	44	C	air	1.2	11.6
2018-04-23	01:59:00	44	C	air	1.2	12.1
2018-04-23	02:59:00	44	C	air	1.2	11.6
2018-04-23	03:59:00	44	C	air	1.2	11.6
2018-04-23	04:59:00	44	C	air	1.2	10.6
2018-04-23	05:59:00	44	C	air	1.2	10.6
2018-04-23	06:59:00	44	C	air	1.2	17.1
2018-04-23	07:59:00	44	C	air	1.2	23.1
2018-04-23	08:59:00	44	C	air	1.2	25.6
2018-04-23	09:59:00	44	C	air	1.2	24.1
2018-04-23	10:59:00	44	C	air	1.2	20.1
2018-04-23	11:59:00	44	C	air	1.2	20.1
2018-04-23	12:59:00	44	C	air	1.2	24.6
2018-04-23	13:59:00	44	C	air	1.2	22.6
2018-04-23	14:59:00	44	C	air	1.2	19.6
2018-04-23	15:59:00	44	C	air	1.2	16.1
2018-04-23	16:59:00	44	C	air	1.2	16.1
2018-04-23	17:59:00	44	C	air	1.2	16.6
2018-04-23	18:59:00	44	C	air	1.2	18.6
2018-04-23	19:59:00	44	C	air	1.2	12.1
2018-04-23	20:59:00	44	C	air	1.2	11.1
2018-04-23	21:59:00	44	C	air	1.2	11.6
2018-04-23	22:59:00	44	C	air	1.2	10.6
2018-04-23	23:59:00	44	C	air	1.2	11.1
2018-04-24	00:59:00	44	C	air	1.2	11.1
2018-04-24	01:59:00	44	C	air	1.2	11.1
2018-04-24	02:59:00	44	C	air	1.2	11.1
2018-04-24	03:59:00	44	C	air	1.2	11.1
2018-04-24	04:59:00	44	C	air	1.2	10.6
2018-04-24	05:59:00	44	C	air	1.2	10.1
2018-04-24	06:59:00	44	C	air	1.2	16.1
2018-04-24	07:59:00	44	C	air	1.2	24.1
2018-04-24	08:59:00	44	C	air	1.2	27.1
2018-04-24	09:59:00	44	C	air	1.2	27.1
2018-04-24	10:59:00	44	C	air	1.2	27.1
2018-04-24	11:59:00	44	C	air	1.2	25.6
2018-04-24	12:59:00	44	C	air	1.2	23.6
2018-04-24	13:59:00	44	C	air	1.2	28.6
2018-04-24	14:59:00	44	C	air	1.2	29.1
2018-04-24	15:59:00	44	C	air	1.2	29.1
2018-04-24	16:59:00	44	C	air	1.2	25.1
2018-04-24	17:59:00	44	C	air	1.2	27.1
2018-04-24	18:59:00	44	C	air	1.2	20.6
2018-04-24	19:59:00	44	C	air	1.2	14.6
2018-04-24	20:59:00	44	C	air	1.2	12.6
2018-04-24	21:59:00	44	C	air	1.2	11.1
2018-04-24	22:59:00	44	C	air	1.2	10.1
2018-04-24	23:59:00	44	C	air	1.2	8.6
2018-04-25	00:59:00	44	C	air	1.2	7.1
2018-04-25	01:59:00	44	C	air	1.2	7.1
2018-04-25	02:59:00	44	C	air	1.2	7.6
2018-04-25	03:59:00	44	C	air	1.2	8.1
2018-04-25	04:59:00	44	C	air	1.2	7.1
2018-04-25	05:59:00	44	C	air	1.2	8.1
2018-04-25	06:59:00	44	C	air	1.2	19.6
2018-04-25	07:59:00	44	C	air	1.2	18.6
2018-04-25	08:59:00	44	C	air	1.2	23.1
2018-04-25	09:59:00	44	C	air	1.2	24.6
2018-04-25	10:59:00	44	C	air	1.2	23.1
2018-04-25	11:59:00	44	C	air	1.2	23.6
2018-04-25	12:59:00	44	C	air	1.2	24.6
2018-04-25	13:59:00	44	C	air	1.2	24.1
2018-04-25	14:59:00	44	C	air	1.2	24.6
2018-04-25	15:59:00	44	C	air	1.2	22.6
2018-04-25	16:59:00	44	C	air	1.2	24.1
2018-04-25	17:59:00	44	C	air	1.2	22.1
2018-04-25	18:59:00	44	C	air	1.2	19.6
2018-04-25	19:59:00	44	C	air	1.2	17.1
2018-04-25	20:59:00	44	C	air	1.2	15.1
2018-04-25	21:59:00	44	C	air	1.2	13.1
2018-04-25	22:59:00	44	C	air	1.2	10.1
2018-04-25	23:59:00	44	C	air	1.2	11.1
2018-04-26	00:59:00	44	C	air	1.2	11.6
2018-04-26	01:59:00	44	C	air	1.2	13.6
2018-04-26	02:59:00	44	C	air	1.2	11.1
2018-04-26	03:59:00	44	C	air	1.2	10.6
2018-04-26	04:59:00	44	C	air	1.2	10.1
2018-04-26	05:59:00	44	C	air	1.2	9.1
2018-04-26	06:59:00	44	C	air	1.2	11.6
2018-04-26	07:59:00	44	C	air	1.2	11.6
2018-04-26	08:59:00	44	C	air	1.2	12.6
2018-04-26	09:59:00	44	C	air	1.2	13.1
2018-04-26	10:59:00	44	C	air	1.2	14.6
2018-04-26	11:59:00	44	C	air	1.2	16.6
2018-04-26	12:59:00	44	C	air	1.2	21.1
2018-04-26	13:59:00	44	C	air	1.2	17.1
2018-04-26	14:59:00	44	C	air	1.2	20.6
2018-04-26	15:59:00	44	C	air	1.2	18.6
2018-04-26	16:59:00	44	C	air	1.2	16.1
2018-04-26	17:59:00	44	C	air	1.2	16.6
2018-04-26	18:59:00	44	C	air	1.2	14.1
2018-04-26	19:59:00	44	C	air	1.2	11.6
2018-04-26	20:59:00	44	C	air	1.2	9.6
2018-04-26	21:59:00	44	C	air	1.2	10.1
2018-04-26	22:59:00	44	C	air	1.2	8.6
2018-04-26	23:59:00	44	C	air	1.2	9.1
2018-04-27	00:59:00	44	C	air	1.2	7.6
2018-04-27	01:59:00	44	C	air	1.2	5.6
2018-04-27	02:59:00	44	C	air	1.2	4.1
2018-04-27	03:59:00	44	C	air	1.2	2.5
2018-04-27	04:59:00	44	C	air	1.2	1.5
2018-04-27	05:59:00	44	C	air	1.2	3.6
2018-04-27	06:59:00	44	C	air	1.2	9.1
2018-04-27	07:59:00	44	C	air	1.2	16.1
2018-04-27	08:59:00	44	C	air	1.2	22.1
2018-04-27	09:59:00	44	C	air	1.2	23.6
2018-04-27	10:59:00	44	C	air	1.2	25.1
2018-04-27	11:59:00	44	C	air	1.2	25.1
2018-04-27	12:59:00	44	C	air	1.2	26.1
2018-04-27	13:59:00	44	C	air	1.2	27.6
2018-04-27	14:59:00	44	C	air	1.2	30.1
2018-04-27	15:59:00	44	C	air	1.2	28.1
2018-04-27	16:59:00	44	C	air	1.2	29.1
2018-04-27	17:59:00	44	C	air	1.2	24.6
2018-04-27	18:59:00	44	C	air	1.2	20.1
2018-04-27	19:59:00	44	C	air	1.2	13.1
2018-04-27	20:59:00	44	C	air	1.2	10.6
2018-04-27	21:59:00	44	C	air	1.2	9.1
2018-04-27	22:59:00	44	C	air	1.2	9.1
2018-04-27	23:59:00	44	C	air	1.2	9.1
2018-04-28	00:59:00	44	C	air	1.2	9.6
2018-04-28	01:59:00	44	C	air	1.2	10.6
2018-04-28	02:59:00	44	C	air	1.2	10.6
2018-04-28	03:59:00	44	C	air	1.2	11.6
2018-04-28	04:59:00	44	C	air	1.2	10.1
2018-04-28	05:59:00	44	C	air	1.2	12.1
2018-04-28	06:59:00	44	C	air	1.2	10.6
2018-04-28	07:59:00	44	C	air	1.2	12.1
2018-04-28	08:59:00	44	C	air	1.2	13.6
2018-04-28	09:59:00	44	C	air	1.2	22.1
2018-04-28	10:59:00	44	C	air	1.2	23.6
2018-04-28	11:59:00	44	C	air	1.2	25.1
2018-04-28	12:59:00	44	C	air	1.2	24.6
2018-04-28	13:59:00	44	C	air	1.2	23.6
2018-04-28	14:59:00	44	C	air	1.2	23.1
2018-04-28	15:59:00	44	C	air	1.2	22.6
2018-04-28	16:59:00	44	C	air	1.2	21.1
2018-04-28	17:59:00	44	C	air	1.2	18.6
2018-04-28	18:59:00	44	C	air	1.2	17.1
2018-04-28	19:59:00	44	C	air	1.2	15.1
2018-04-28	20:59:00	44	C	air	1.2	14.6
2018-04-28	21:59:00	44	C	air	1.2	12.6
2018-04-28	22:59:00	44	C	air	1.2	11.6
2018-04-28	23:59:00	44	C	air	1.2	10.1
2018-04-29	00:59:00	44	C	air	1.2	9.6
2018-04-29	01:59:00	44	C	air	1.2	9.1
2018-04-29	02:59:00	44	C	air	1.2	7.6
2018-04-29	03:59:00	44	C	air	1.2	7.1
2018-04-29	04:59:00	44	C	air	1.2	8.1
2018-04-29	05:59:00	44	C	air	1.2	8.6
2018-04-29	06:59:00	44	C	air	1.2	10.1
2018-04-29	07:59:00	44	C	air	1.2	14.6
2018-04-29	08:59:00	44	C	air	1.2	21.1
2018-04-29	09:59:00	44	C	air	1.2	24.6
2018-04-29	10:59:00	44	C	air	1.2	26.6
2018-04-29	11:59:00	44	C	air	1.2	27.6
2018-04-29	12:59:00	44	C	air	1.2	28.6
2018-04-29	13:59:00	44	C	air	1.2	27.6
2018-04-29	14:59:00	44	C	air	1.2	29.6
2018-04-29	15:59:00	44	C	air	1.2	25.1
2018-04-29	16:59:00	44	C	air	1.2	22.6
2018-04-29	17:59:00	44	C	air	1.2	20.6
2018-04-29	18:59:00	44	C	air	1.2	18.6
2018-04-29	19:59:00	44	C	air	1.2	16.6
2018-04-29	20:59:00	44	C	air	1.2	16.6
2018-04-29	21:59:00	44	C	air	1.2	16.1
2018-04-29	22:59:00	44	C	air	1.2	14.6
2018-04-29	23:59:00	44	C	air	1.2	13.1
2018-04-30	00:59:00	44	C	air	1.2	12.6
2018-04-30	01:59:00	44	C	air	1.2	9.1
2018-04-30	02:59:00	44	C	air	1.2	8.6
2018-04-30	03:59:00	44	C	air	1.2	8.6
2018-04-30	04:59:00	44	C	air	1.2	8.6
2018-04-30	05:59:00	44	C	air	1.2	9.1
2018-04-30	06:59:00	44	C	air	1.2	14.6
2018-04-30	07:59:00	44	C	air	1.2	19.6
2018-04-30	08:59:00	44	C	air	1.2	16.6
2018-04-30	09:59:00	44	C	air	1.2	18.6
2018-04-30	10:59:00	44	C	air	1.2	20.1
2018-04-30	11:59:00	44	C	air	1.2	21.1
2018-04-30	12:59:00	44	C	air	1.2	21.1
2018-04-30	13:59:00	44	C	air	1.2	22.6
2018-04-30	14:59:00	44	C	air	1.2	22.1
2018-04-30	15:59:00	44	C	air	1.2	20.1
2018-04-30	16:59:00	44	C	air	1.2	18.1
2018-04-30	17:59:00	44	C	air	1.2	17.1
2018-04-30	18:59:00	44	C	air	1.2	12.6
2018-04-30	19:59:00	44	C	air	1.2	10.6
2018-04-30	20:59:00	44	C	air	1.2	7.6
2018-04-30	21:59:00	44	C	air	1.2	10.1
2018-04-30	22:59:00	44	C	air	1.2	10.6
2018-04-30	23:59:00	44	C	air	1.2	10.1
2018-05-01	00:59:00	44	C	air	1.2	9.6
2018-05-01	01:59:00	44	C	air	1.2	9.6
2018-05-01	02:59:00	44	C	air	1.2	9.6
2018-05-01	03:59:00	44	C	air	1.2	9.1
2018-05-01	04:59:00	44	C	air	1.2	8.6
2018-05-01	05:59:00	44	C	air	1.2	8.1
2018-05-01	06:59:00	44	C	air	1.2	7.6
2018-05-01	07:59:00	44	C	air	1.2	8.1
2018-05-01	08:59:00	44	C	air	1.2	8.6
2018-05-01	09:59:00	44	C	air	1.2	11.6
2018-05-01	10:59:00	44	C	air	1.2	12.1
2018-05-01	11:59:00	44	C	air	1.2	19.1
2018-05-01	12:59:00	44	C	air	1.2	19.1
2018-05-01	13:59:00	44	C	air	1.2	17.6
2018-05-01	14:59:00	44	C	air	1.2	23.1
2018-05-01	15:59:00	44	C	air	1.2	22.1
2018-05-01	16:59:00	44	C	air	1.2	15.6
2018-05-01	17:59:00	44	C	air	1.2	14.6
2018-05-01	18:59:00	44	C	air	1.2	12.6
2018-05-01	19:59:00	44	C	air	1.2	9.1
2018-05-01	20:59:00	44	C	air	1.2	7.6
2018-05-01	21:59:00	44	C	air	1.2	7.6
2018-05-01	22:59:00	44	C	air	1.2	6.6
2018-05-01	23:59:00	44	C	air	1.2	7.1
2018-05-02	00:59:00	44	C	air	1.2	7.1
2018-05-02	01:59:00	44	C	air	1.2	7.6
2018-05-02	02:59:00	44	C	air	1.2	8.1
2018-05-02	03:59:00	44	C	air	1.2	7.1
2018-05-02	04:59:00	44	C	air	1.2	7.6
2018-05-02	05:59:00	44	C	air	1.2	8.1
2018-05-02	06:59:00	44	C	air	1.2	8.6
2018-05-02	07:59:00	44	C	air	1.2	10.1
2018-05-02	08:59:00	44	C	air	1.2	11.1
2018-05-02	09:59:00	44	C	air	1.2	12.1
2018-05-02	10:59:00	44	C	air	1.2	14.1
2018-05-02	11:59:00	44	C	air	1.2	16.1
2018-05-02	12:59:00	44	C	air	1.2	17.1
2018-05-02	13:59:00	44	C	air	1.2	22.1
2018-05-02	14:59:00	44	C	air	1.2	21.1
2018-05-02	15:59:00	44	C	air	1.2	20.1
2018-05-02	16:59:00	44	C	air	1.2	16.6
2018-05-02	17:59:00	44	C	air	1.2	15.1
2018-05-02	18:59:00	44	C	air	1.2	14.1
2018-05-02	19:59:00	44	C	air	1.2	12.6
2018-05-02	20:59:00	44	C	air	1.2	11.1
2018-05-02	21:59:00	44	C	air	1.2	12.1
2018-05-02	22:59:00	44	C	air	1.2	11.6
2018-05-02	23:59:00	44	C	air	1.2	10.6
2018-05-03	00:59:00	44	C	air	1.2	10.1
2018-05-03	01:59:00	44	C	air	1.2	10.1
2018-05-03	02:59:00	44	C	air	1.2	9.6
2018-05-03	03:59:00	44	C	air	1.2	9.6
2018-05-03	04:59:00	44	C	air	1.2	9.6
2018-05-03	05:59:00	44	C	air	1.2	9.6
2018-05-03	06:59:00	44	C	air	1.2	10.1
2018-05-03	07:59:00	44	C	air	1.2	11.1
2018-05-03	08:59:00	44	C	air	1.2	12.1
2018-05-03	09:59:00	44	C	air	1.2	13.1
2018-05-03	10:59:00	44	C	air	1.2	13.1
2018-05-03	11:59:00	44	C	air	1.2	13.6
2018-05-03	12:59:00	44	C	air	1.2	16.1
2018-05-03	13:59:00	44	C	air	1.2	16.6
2018-05-03	14:59:00	44	C	air	1.2	16.1
2018-05-03	15:59:00	44	C	air	1.2	16.1
2018-05-03	16:59:00	44	C	air	1.2	16.1
2018-05-03	17:59:00	44	C	air	1.2	15.1
2018-05-03	18:59:00	44	C	air	1.2	14.6
2018-05-03	19:59:00	44	C	air	1.2	13.1
2018-05-03	20:59:00	44	C	air	1.2	13.1
2018-05-03	21:59:00	44	C	air	1.2	12.1
2018-05-03	22:59:00	44	C	air	1.2	11.6
2018-05-03	23:59:00	44	C	air	1.2	11.6
2018-05-04	00:59:00	44	C	air	1.2	11.6
2018-05-04	01:59:00	44	C	air	1.2	12.6
2018-05-04	02:59:00	44	C	air	1.2	12.6
2018-05-04	03:59:00	44	C	air	1.2	12.1
2018-05-04	04:59:00	44	C	air	1.2	11.6
2018-05-04	05:59:00	44	C	air	1.2	11.6
2018-05-04	06:59:00	44	C	air	1.2	12.1
2018-05-04	07:59:00	44	C	air	1.2	12.6
2018-05-04	08:59:00	44	C	air	1.2	12.6
2018-05-04	09:59:00	44	C	air	1.2	15.6
2018-05-04	10:59:00	44	C	air	1.2	20.1
2018-05-04	11:59:00	44	C	air	1.2	19.1
2018-05-04	12:59:00	44	C	air	1.2	18.6
2018-05-04	13:59:00	44	C	air	1.2	20.1
2018-05-04	14:59:00	44	C	air	1.2	22.1
2018-05-04	15:59:00	44	C	air	1.2	20.6
2018-05-04	16:59:00	44	C	air	1.2	19.6
2018-05-04	17:59:00	44	C	air	1.2	17.6
2018-05-04	18:59:00	44	C	air	1.2	16.6
2018-05-04	19:59:00	44	C	air	1.2	15.1
2018-05-04	20:59:00	44	C	air	1.2	14.6
2018-05-04	21:59:00	44	C	air	1.2	14.6
2018-05-04	22:59:00	44	C	air	1.2	14.1
2018-05-04	23:59:00	44	C	air	1.2	16.1
2018-05-05	00:59:00	44	C	air	1.2	15.1
2018-05-05	01:59:00	44	C	air	1.2	14.1
2018-05-05	02:59:00	44	C	air	1.2	13.6
2018-05-05	03:59:00	44	C	air	1.2	13.1
2018-05-05	04:59:00	44	C	air	1.2	12.6
2018-05-05	05:59:00	44	C	air	1.2	12.1
2018-05-05	06:59:00	44	C	air	1.2	12.6
2018-05-05	07:59:00	44	C	air	1.2	13.1
2018-05-05	08:59:00	44	C	air	1.2	16.6
2018-05-05	09:59:00	44	C	air	1.2	19.6
2018-05-05	10:59:00	44	C	air	1.2	24.1
2018-05-05	11:59:00	44	C	air	1.2	26.6
2018-05-05	12:59:00	44	C	air	1.2	26.1
2018-05-05	13:59:00	44	C	air	1.2	28.1
2018-05-05	14:59:00	44	C	air	1.2	27.6
2018-05-05	15:59:00	44	C	air	1.2	33.6
2018-05-05	16:59:00	44	C	air	1.2	30.1
2018-05-05	17:59:00	44	C	air	1.2	28.1
2018-05-05	18:59:00	44	C	air	1.2	23.1
2018-05-05	19:59:00	44	C	air	1.2	18.6
2018-05-05	20:59:00	44	C	air	1.2	17.1
2018-05-05	21:59:00	44	C	air	1.2	15.1
2018-05-05	22:59:00	44	C	air	1.2	13.6
2018-05-05	23:59:00	44	C	air	1.2	12.1
2018-05-06	00:59:00	44	C	air	1.2	11.6
2018-05-06	01:59:00	44	C	air	1.2	10.6
2018-05-06	02:59:00	44	C	air	1.2	10.6
2018-05-06	03:59:00	44	C	air	1.2	9.6
2018-05-06	04:59:00	44	C	air	1.2	9.1
2018-05-06	05:59:00	44	C	air	1.2	11.1
2018-05-06	06:59:00	44	C	air	1.2	16.1
2018-05-06	07:59:00	44	C	air	1.2	20.6
2018-05-06	08:59:00	44	C	air	1.2	26.1
2018-05-06	09:59:00	44	C	air	1.2	28.1
2018-05-06	10:59:00	44	C	air	1.2	30.1
2018-05-06	11:59:00	44	C	air	1.2	28.1
2018-05-06	12:59:00	44	C	air	1.2	29.1
2018-05-06	13:59:00	44	C	air	1.2	29.1
2018-05-06	14:59:00	44	C	air	1.2	32.1
2018-05-06	15:59:00	44	C	air	1.2	31.6
2018-05-06	16:59:00	44	C	air	1.2	30.6
2018-05-06	17:59:00	44	C	air	1.2	29.6
2018-05-06	18:59:00	44	C	air	1.2	25.6
2018-05-06	19:59:00	44	C	air	1.2	21.1
2018-05-06	20:59:00	44	C	air	1.2	16.6
2018-05-06	21:59:00	44	C	air	1.2	13.1
2018-05-06	22:59:00	44	C	air	1.2	13.1
2018-05-06	23:59:00	44	C	air	1.2	11.6
2018-05-07	00:59:00	44	C	air	1.2	10.1
2018-05-07	01:59:00	44	C	air	1.2	8.6
2018-05-07	02:59:00	44	C	air	1.2	7.6
2018-05-07	03:59:00	44	C	air	1.2	6.6
2018-05-07	04:59:00	44	C	air	1.2	6.1
2018-05-07	05:59:00	44	C	air	1.2	10.1
2018-05-07	06:59:00	44	C	air	1.2	15.1
2018-05-07	07:59:00	44	C	air	1.2	21.6
2018-05-07	08:59:00	44	C	air	1.2	26.1
2018-05-07	09:59:00	44	C	air	1.2	28.6
2018-05-07	10:59:00	44	C	air	1.2	27.6
2018-05-07	11:59:00	44	C	air	1.2	29.1
2018-05-07	12:59:00	44	C	air	1.2	28.6
2018-05-07	13:59:00	44	C	air	1.2	29.6
2018-05-07	14:59:00	44	C	air	1.2	31.6
2018-05-07	15:59:00	44	C	air	1.2	33.1
2018-05-07	16:59:00	44	C	air	1.2	33.6
2018-05-07	17:59:00	44	C	air	1.2	27.1
2018-05-07	18:59:00	44	C	air	1.2	28.1
2018-05-07	19:59:00	44	C	air	1.2	20.6
2018-05-07	20:59:00	44	C	air	1.2	14.6
2018-05-07	21:59:00	44	C	air	1.2	13.1
2018-05-07	22:59:00	44	C	air	1.2	13.1
2018-05-07	23:59:00	44	C	air	1.2	11.1
2018-05-08	00:59:00	44	C	air	1.2	10.6
2018-05-08	01:59:00	44	C	air	1.2	9.1
2018-05-08	02:59:00	44	C	air	1.2	8.6
2018-05-08	03:59:00	44	C	air	1.2	9.1
2018-05-08	04:59:00	44	C	air	1.2	7.6
2018-05-08	05:59:00	44	C	air	1.2	11.1
2018-05-08	06:59:00	44	C	air	1.2	17.1
2018-05-08	07:59:00	44	C	air	1.2	22.6
2018-05-08	08:59:00	44	C	air	1.2	28.6
2018-05-08	09:59:00	44	C	air	1.2	28.6
2018-05-08	10:59:00	44	C	air	1.2	29.6
2018-05-08	11:59:00	44	C	air	1.2	30.1
2018-05-08	12:59:00	44	C	air	1.2	29.1
2018-05-08	13:59:00	44	C	air	1.2	31.6
2018-05-08	14:59:00	44	C	air	1.2	32.6
2018-05-08	15:59:00	44	C	air	1.2	33.1
2018-05-08	16:59:00	44	C	air	1.2	34.6
2018-05-08	17:59:00	44	C	air	1.2	30.6
2018-05-08	18:59:00	44	C	air	1.2	25.6
2018-05-08	19:59:00	44	C	air	1.2	20.6
2018-05-08	20:59:00	44	C	air	1.2	18.1
2018-05-08	21:59:00	44	C	air	1.2	16.1
2018-05-08	22:59:00	44	C	air	1.2	14.6
2018-05-08	23:59:00	44	C	air	1.2	13.1
2018-05-09	00:59:00	44	C	air	1.2	12.1
2018-05-09	01:59:00	44	C	air	1.2	11.1
2018-05-09	02:59:00	44	C	air	1.2	9.6
2018-05-09	03:59:00	44	C	air	1.2	9.1
2018-05-09	04:59:00	44	C	air	1.2	8.1
2018-05-09	05:59:00	44	C	air	1.2	13.1
2018-05-09	06:59:00	44	C	air	1.2	19.6
2018-05-09	07:59:00	44	C	air	1.2	21.6
2018-05-09	08:59:00	44	C	air	1.2	27.6
2018-05-09	09:59:00	44	C	air	1.2	29.6
2018-05-09	10:59:00	44	C	air	1.2	29.6
2018-05-09	11:59:00	44	C	air	1.2	32.1
2018-05-09	12:59:00	44	C	air	1.2	23.1
2018-05-09	13:59:00	44	C	air	1.2	18.6
2018-05-09	14:59:00	44	C	air	1.2	22.1
2018-05-09	15:59:00	44	C	air	1.2	34.6
2018-05-09	16:59:00	44	C	air	1.2	34.6
2018-05-09	17:59:00	44	C	air	1.2	28.6
2018-05-09	18:59:00	44	C	air	1.2	25.1
2018-05-09	19:59:00	44	C	air	1.2	18.6
2018-05-09	20:59:00	44	C	air	1.2	16.1
2018-05-09	21:59:00	44	C	air	1.2	13.6
2018-05-09	22:59:00	44	C	air	1.2	13.1
2018-05-09	23:59:00	44	C	air	1.2	12.1
2018-05-10	00:59:00	44	C	air	1.2	12.1
2018-05-10	01:59:00	44	C	air	1.2	14.6
2018-05-10	02:59:00	44	C	air	1.2	15.1
2018-05-10	03:59:00	44	C	air	1.2	14.1
2018-05-10	04:59:00	44	C	air	1.2	13.6
2018-05-10	05:59:00	44	C	air	1.2	13.1
2018-05-10	06:59:00	44	C	air	1.2	13.1
2018-05-10	07:59:00	44	C	air	1.2	13.6
2018-05-10	08:59:00	44	C	air	1.2	15.6
2018-05-10	09:59:00	44	C	air	1.2	15.6
2018-05-10	10:59:00	44	C	air	1.2	16.1
2018-05-10	11:59:00	44	C	air	1.2	16.1
2018-05-10	12:59:00	44	C	air	1.2	14.1
2018-05-10	13:59:00	44	C	air	1.2	13.1
2018-05-10	14:59:00	44	C	air	1.2	12.1
2018-05-10	15:59:00	44	C	air	1.2	14.1
2018-05-10	16:59:00	44	C	air	1.2	15.1
2018-05-10	17:59:00	44	C	air	1.2	15.6
2018-05-10	18:59:00	44	C	air	1.2	13.1
2018-05-10	19:59:00	44	C	air	1.2	12.6
2018-05-10	20:59:00	44	C	air	1.2	12.1
2018-05-10	21:59:00	44	C	air	1.2	11.6
2018-05-10	22:59:00	44	C	air	1.2	11.1
2018-05-10	23:59:00	44	C	air	1.2	11.1
2018-05-11	00:59:00	44	C	air	1.2	11.6
2018-05-11	01:59:00	44	C	air	1.2	11.6
2018-05-11	02:59:00	44	C	air	1.2	10.1
2018-05-11	03:59:00	44	C	air	1.2	9.1
2018-05-11	04:59:00	44	C	air	1.2	7.6
2018-05-11	05:59:00	44	C	air	1.2	9.1
2018-05-11	06:59:00	44	C	air	1.2	12.6
2018-05-11	07:59:00	44	C	air	1.2	21.1
2018-05-11	08:59:00	44	C	air	1.2	20.1
2018-05-11	09:59:00	44	C	air	1.2	23.6
2018-05-11	10:59:00	44	C	air	1.2	24.1
2018-05-11	11:59:00	44	C	air	1.2	24.1
2018-05-11	12:59:00	44	C	air	1.2	25.6
2018-05-11	13:59:00	44	C	air	1.2	28.1
2018-05-11	14:59:00	44	C	air	1.2	30.6
2018-05-11	15:59:00	44	C	air	1.2	31.1
2018-05-11	16:59:00	44	C	air	1.2	29.1
2018-05-11	17:59:00	44	C	air	1.2	26.6
2018-05-11	18:59:00	44	C	air	1.2	24.6
2018-05-11	19:59:00	44	C	air	1.2	15.6
2018-05-11	20:59:00	44	C	air	1.2	14.1
2018-05-11	21:59:00	44	C	air	1.2	13.6
2018-05-11	22:59:00	44	C	air	1.2	12.6
2018-05-11	23:59:00	44	C	air	1.2	12.1
2018-05-12	00:59:00	44	C	air	1.2	11.1
2018-05-12	01:59:00	44	C	air	1.2	10.6
2018-05-12	02:59:00	44	C	air	1.2	9.6
2018-05-12	03:59:00	44	C	air	1.2	9.6
2018-05-12	04:59:00	44	C	air	1.2	10.1
2018-05-12	05:59:00	44	C	air	1.2	12.1
2018-05-12	06:59:00	44	C	air	1.2	17.6
2018-05-12	07:59:00	44	C	air	1.2	24.1
2018-05-12	08:59:00	44	C	air	1.2	28.1
2018-05-12	09:59:00	44	C	air	1.2	30.1
2018-05-12	10:59:00	44	C	air	1.2	28.6
2018-05-12	11:59:00	44	C	air	1.2	29.6
2018-05-12	12:59:00	44	C	air	1.2	30.6
2018-05-12	13:59:00	44	C	air	1.2	32.1
2018-05-12	14:59:00	44	C	air	1.2	34.1
2018-05-12	15:59:00	44	C	air	1.2	35.1
2018-05-12	16:59:00	44	C	air	1.2	30.1
2018-05-12	17:59:00	44	C	air	1.2	24.6
2018-05-12	18:59:00	44	C	air	1.2	21.1
2018-05-12	19:59:00	44	C	air	1.2	17.6
2018-05-12	20:59:00	44	C	air	1.2	18.6
2018-05-12	21:59:00	44	C	air	1.2	17.1
2018-05-12	22:59:00	44	C	air	1.2	18.6
2018-05-12	23:59:00	44	C	air	1.2	14.6
2018-05-13	00:59:00	44	C	air	1.2	13.1
2018-05-13	01:59:00	44	C	air	1.2	12.6
2018-05-13	02:59:00	44	C	air	1.2	12.1
2018-05-13	03:59:00	44	C	air	1.2	13.1
2018-05-13	04:59:00	44	C	air	1.2	12.1
2018-05-13	05:59:00	44	C	air	1.2	11.6
2018-05-13	06:59:00	44	C	air	1.2	11.6
2018-05-13	07:59:00	44	C	air	1.2	11.6
2018-05-13	08:59:00	44	C	air	1.2	11.1
2018-05-13	09:59:00	44	C	air	1.2	11.1
2018-05-13	10:59:00	44	C	air	1.2	10.6
2018-05-13	11:59:00	44	C	air	1.2	10.6
2018-05-13	12:59:00	44	C	air	1.2	11.1
2018-05-13	13:59:00	44	C	air	1.2	11.1
2018-05-13	14:59:00	44	C	air	1.2	11.1
2018-05-13	15:59:00	44	C	air	1.2	11.1
2018-05-13	16:59:00	44	C	air	1.2	10.1
2018-05-13	17:59:00	44	C	air	1.2	10.1
2018-05-13	18:59:00	44	C	air	1.2	10.1
2018-05-13	19:59:00	44	C	air	1.2	10.1
2018-05-13	20:59:00	44	C	air	1.2	9.6
2018-05-13	21:59:00	44	C	air	1.2	10.1
2018-05-13	22:59:00	44	C	air	1.2	9.6
2018-05-13	23:59:00	44	C	air	1.2	9.1
2018-05-14	00:59:00	44	C	air	1.2	9.1
2018-05-14	01:59:00	44	C	air	1.2	9.1
2018-05-14	02:59:00	44	C	air	1.2	9.1
2018-05-14	03:59:00	44	C	air	1.2	9.1
2018-05-14	04:59:00	44	C	air	1.2	9.1
2018-05-14	05:59:00	44	C	air	1.2	9.6
2018-05-14	06:59:00	44	C	air	1.2	11.1
2018-05-14	07:59:00	44	C	air	1.2	13.1
2018-05-14	08:59:00	44	C	air	1.2	15.1
2018-05-14	09:59:00	44	C	air	1.2	14.1
2018-05-14	10:59:00	44	C	air	1.2	14.6
2018-05-14	11:59:00	44	C	air	1.2	21.1
2018-05-14	12:59:00	44	C	air	1.2	16.6
2018-05-14	13:59:00	44	C	air	1.2	15.1
2018-05-14	14:59:00	44	C	air	1.2	15.1
2018-05-14	15:59:00	44	C	air	1.2	15.1
2018-05-14	16:59:00	44	C	air	1.2	14.1
2018-05-14	17:59:00	44	C	air	1.2	12.6
2018-05-14	18:59:00	44	C	air	1.2	12.6
2018-05-14	19:59:00	44	C	air	1.2	12.1
2018-05-14	20:59:00	44	C	air	1.2	11.6
2018-05-14	21:59:00	44	C	air	1.2	11.6
2018-05-14	22:59:00	44	C	air	1.2	11.6
2018-05-14	23:59:00	44	C	air	1.2	11.6
2018-05-15	00:59:00	44	C	air	1.2	11.1
2018-05-15	01:59:00	44	C	air	1.2	11.6
2018-05-15	02:59:00	44	C	air	1.2	11.6
2018-05-15	03:59:00	44	C	air	1.2	11.6
2018-05-15	04:59:00	44	C	air	1.2	11.6
2018-05-15	05:59:00	44	C	air	1.2	12.1
2018-05-15	06:59:00	44	C	air	1.2	13.1
2018-05-15	07:59:00	44	C	air	1.2	15.6
2018-05-15	08:59:00	44	C	air	1.2	13.6
2018-05-15	09:59:00	44	C	air	1.2	15.6
2018-05-15	10:59:00	44	C	air	1.2	16.6
2018-05-15	11:59:00	44	C	air	1.2	16.6
2018-05-15	12:59:00	44	C	air	1.2	17.6
2018-05-15	13:59:00	44	C	air	1.2	14.1
2018-05-15	14:59:00	44	C	air	1.2	18.6
2018-05-15	15:59:00	44	C	air	1.2	13.6
2018-05-15	16:59:00	44	C	air	1.2	16.6
2018-05-15	17:59:00	44	C	air	1.2	13.1
2018-05-15	18:59:00	44	C	air	1.2	12.6
2018-05-15	19:59:00	44	C	air	1.2	11.6
2018-05-15	20:59:00	44	C	air	1.2	11.1
2018-05-15	21:59:00	44	C	air	1.2	10.6
2018-05-15	22:59:00	44	C	air	1.2	11.1
2018-05-15	23:59:00	44	C	air	1.2	10.6
2018-05-16	00:59:00	44	C	air	1.2	10.1
2018-05-16	01:59:00	44	C	air	1.2	9.6
2018-05-16	02:59:00	44	C	air	1.2	9.1
2018-05-16	03:59:00	44	C	air	1.2	8.1
2018-05-16	04:59:00	44	C	air	1.2	8.1
2018-05-16	05:59:00	44	C	air	1.2	9.6
2018-05-16	06:59:00	44	C	air	1.2	12.6
2018-05-16	07:59:00	44	C	air	1.2	12.1
2018-05-16	08:59:00	44	C	air	1.2	13.6
2018-05-16	09:59:00	44	C	air	1.2	12.6
2018-05-16	10:59:00	44	C	air	1.2	13.1
2018-05-16	11:59:00	44	C	air	1.2	15.6
2018-05-16	12:59:00	44	C	air	1.2	19.1
2018-05-16	13:59:00	44	C	air	1.2	21.1
2018-05-16	14:59:00	44	C	air	1.2	16.1
2018-05-16	15:59:00	44	C	air	1.2	15.1
2018-05-16	16:59:00	44	C	air	1.2	14.6
2018-05-16	17:59:00	44	C	air	1.2	13.1
2018-05-16	18:59:00	44	C	air	1.2	13.1
2018-05-16	19:59:00	44	C	air	1.2	11.6
2018-05-16	20:59:00	44	C	air	1.2	11.1
2018-05-16	21:59:00	44	C	air	1.2	9.1
2018-05-16	22:59:00	44	C	air	1.2	9.1
2018-05-16	23:59:00	44	C	air	1.2	9.6
2018-05-17	00:59:00	44	C	air	1.2	9.6
2018-05-17	01:59:00	44	C	air	1.2	8.1
2018-05-17	02:59:00	44	C	air	1.2	7.1
2018-05-17	03:59:00	44	C	air	1.2	8.6
2018-05-17	04:59:00	44	C	air	1.2	8.6
2018-05-17	05:59:00	44	C	air	1.2	9.6
2018-05-17	06:59:00	44	C	air	1.2	10.6
2018-05-17	07:59:00	44	C	air	1.2	14.1
2018-05-17	08:59:00	44	C	air	1.2	13.1
2018-05-17	09:59:00	44	C	air	1.2	15.1
2018-05-17	10:59:00	44	C	air	1.2	19.6
2018-05-17	11:59:00	44	C	air	1.2	20.6
2018-05-17	12:59:00	44	C	air	1.2	20.1
2018-05-17	13:59:00	44	C	air	1.2	20.6
2018-05-17	14:59:00	44	C	air	1.2	23.1
2018-05-17	15:59:00	44	C	air	1.2	23.1
2018-05-17	16:59:00	44	C	air	1.2	16.6
2018-05-17	17:59:00	44	C	air	1.2	12.6
2018-05-17	18:59:00	44	C	air	1.2	14.1
2018-05-17	19:59:00	44	C	air	1.2	12.1
2018-05-17	20:59:00	44	C	air	1.2	10.6
2018-05-17	21:59:00	44	C	air	1.2	9.6
2018-05-17	22:59:00	44	C	air	1.2	10.1
2018-05-17	23:59:00	44	C	air	1.2	8.6
2018-05-18	00:59:00	44	C	air	1.2	10.1
2018-05-18	01:59:00	44	C	air	1.2	9.6
2018-05-18	02:59:00	44	C	air	1.2	9.6
2018-05-18	03:59:00	44	C	air	1.2	9.6
2018-05-18	04:59:00	44	C	air	1.2	9.6
2018-05-18	05:59:00	44	C	air	1.2	10.6
2018-05-18	06:59:00	44	C	air	1.2	11.6
2018-05-18	07:59:00	44	C	air	1.2	16.1
2018-05-18	08:59:00	44	C	air	1.2	17.1
2018-05-18	09:59:00	44	C	air	1.2	23.6
2018-05-18	10:59:00	44	C	air	1.2	21.6
2018-05-18	11:59:00	44	C	air	1.2	26.6
2018-05-18	12:59:00	44	C	air	1.2	25.6
2018-05-18	13:59:00	44	C	air	1.2	25.6
2018-05-18	14:59:00	44	C	air	1.2	29.1
2018-05-18	15:59:00	44	C	air	1.2	23.1
2018-05-18	16:59:00	44	C	air	1.2	27.1
2018-05-18	17:59:00	44	C	air	1.2	25.6
2018-05-18	18:59:00	44	C	air	1.2	20.6
2018-05-18	19:59:00	44	C	air	1.2	15.1
2018-05-18	20:59:00	44	C	air	1.2	13.6
2018-05-18	21:59:00	44	C	air	1.2	12.6
2018-05-18	22:59:00	44	C	air	1.2	11.6
2018-05-18	23:59:00	44	C	air	1.2	11.1
2018-05-19	00:59:00	44	C	air	1.2	9.6
2018-05-19	01:59:00	44	C	air	1.2	9.1
2018-05-19	02:59:00	44	C	air	1.2	8.6
2018-05-19	03:59:00	44	C	air	1.2	8.1
2018-05-19	04:59:00	44	C	air	1.2	7.6
2018-05-19	05:59:00	44	C	air	1.2	9.1
2018-05-19	06:59:00	44	C	air	1.2	12.6
2018-05-19	07:59:00	44	C	air	1.2	15.1
2018-05-19	08:59:00	44	C	air	1.2	19.1
2018-05-19	09:59:00	44	C	air	1.2	22.6
2018-05-19	10:59:00	44	C	air	1.2	24.1
2018-05-19	11:59:00	44	C	air	1.2	22.6
2018-05-19	12:59:00	44	C	air	1.2	25.1
2018-05-19	13:59:00	44	C	air	1.2	27.1
2018-05-19	14:59:00	44	C	air	1.2	28.1
2018-05-19	15:59:00	44	C	air	1.2	24.6
2018-05-19	16:59:00	44	C	air	1.2	22.1
2018-05-19	17:59:00	44	C	air	1.2	19.6
2018-05-19	18:59:00	44	C	air	1.2	16.6
2018-05-19	19:59:00	44	C	air	1.2	14.1
2018-05-19	20:59:00	44	C	air	1.2	13.6
2018-05-19	21:59:00	44	C	air	1.2	12.1
2018-05-19	22:59:00	44	C	air	1.2	12.1
2018-05-19	23:59:00	44	C	air	1.2	11.1
2018-05-20	00:59:00	44	C	air	1.2	10.6
2018-05-20	01:59:00	44	C	air	1.2	10.1
2018-05-20	02:59:00	44	C	air	1.2	9.6
2018-05-20	03:59:00	44	C	air	1.2	8.1
2018-05-20	04:59:00	44	C	air	1.2	8.1
2018-05-20	05:59:00	44	C	air	1.2	10.6
2018-05-20	06:59:00	44	C	air	1.2	12.6
2018-05-20	07:59:00	44	C	air	1.2	18.6
2018-05-20	08:59:00	44	C	air	1.2	24.6
2018-05-20	09:59:00	44	C	air	1.2	21.1
2018-05-20	10:59:00	44	C	air	1.2	21.6
2018-05-20	11:59:00	44	C	air	1.2	21.6
2018-05-20	12:59:00	44	C	air	1.2	25.6
2018-05-20	13:59:00	44	C	air	1.2	28.6
2018-05-20	14:59:00	44	C	air	1.2	22.6
2018-05-20	15:59:00	44	C	air	1.2	24.1
2018-05-20	16:59:00	44	C	air	1.2	32.1
2018-05-20	17:59:00	44	C	air	1.2	20.1
2018-05-20	18:59:00	44	C	air	1.2	19.1
2018-05-20	19:59:00	44	C	air	1.2	16.6
2018-05-20	20:59:00	44	C	air	1.2	13.1
2018-05-20	21:59:00	44	C	air	1.2	13.6
2018-05-20	22:59:00	44	C	air	1.2	13.6
2018-05-20	23:59:00	44	C	air	1.2	12.1
2018-05-21	00:59:00	44	C	air	1.2	11.1
2018-05-21	01:59:00	44	C	air	1.2	11.1
2018-05-21	02:59:00	44	C	air	1.2	12.6
2018-05-21	03:59:00	44	C	air	1.2	12.6
2018-05-21	04:59:00	44	C	air	1.2	12.6
2018-05-21	05:59:00	44	C	air	1.2	13.1
2018-05-21	06:59:00	44	C	air	1.2	24.1
2018-05-21	07:59:00	44	C	air	1.2	24.1
2018-05-21	08:59:00	44	C	air	1.2	26.6
2018-05-21	09:59:00	44	C	air	1.2	26.6
2018-05-21	10:59:00	44	C	air	1.2	27.6
2018-05-21	11:59:00	44	C	air	1.2	30.1
2018-05-21	12:59:00	44	C	air	1.2	25.1
2018-05-21	13:59:00	44	C	air	1.2	32.6
2018-05-21	14:59:00	44	C	air	1.2	27.1
2018-05-21	15:59:00	44	C	air	1.2	22.1
2018-05-21	16:59:00	44	C	air	1.2	19.1
2018-05-21	17:59:00	44	C	air	1.2	27.1
2018-05-21	18:59:00	44	C	air	1.2	25.6
2018-05-21	19:59:00	44	C	air	1.2	16.6
2018-05-21	20:59:00	44	C	air	1.2	14.1
2018-05-21	21:59:00	44	C	air	1.2	13.6
2018-05-21	22:59:00	44	C	air	1.2	12.6
2018-05-21	23:59:00	44	C	air	1.2	12.1
2018-05-22	00:59:00	44	C	air	1.2	11.6
2018-05-22	01:59:00	44	C	air	1.2	11.1
2018-05-22	02:59:00	44	C	air	1.2	11.1
2018-05-22	03:59:00	44	C	air	1.2	10.6
2018-05-22	04:59:00	44	C	air	1.2	10.6
2018-05-22	05:59:00	44	C	air	1.2	15.1
2018-05-22	06:59:00	44	C	air	1.2	20.1
2018-05-22	07:59:00	44	C	air	1.2	24.1
2018-05-22	08:59:00	44	C	air	1.2	26.6
2018-05-22	09:59:00	44	C	air	1.2	28.6
2018-05-22	10:59:00	44	C	air	1.2	28.6
2018-05-22	11:59:00	44	C	air	1.2	31.6
2018-05-22	12:59:00	44	C	air	1.2	28.6
2018-05-22	13:59:00	44	C	air	1.2	30.1
2018-05-22	14:59:00	44	C	air	1.2	24.6
2018-05-22	15:59:00	44	C	air	1.2	23.6
2018-05-22	16:59:00	44	C	air	1.2	21.6
2018-05-22	17:59:00	44	C	air	1.2	20.6
2018-05-22	18:59:00	44	C	air	1.2	21.1
2018-05-22	19:59:00	44	C	air	1.2	18.1
2018-05-22	20:59:00	44	C	air	1.2	16.6
2018-05-22	21:59:00	44	C	air	1.2	16.1
2018-05-22	22:59:00	44	C	air	1.2	15.6
2018-05-22	23:59:00	44	C	air	1.2	14.1
2018-05-23	00:59:00	44	C	air	1.2	13.6
2018-05-23	01:59:00	44	C	air	1.2	12.6
2018-05-23	02:59:00	44	C	air	1.2	11.6
2018-05-23	03:59:00	44	C	air	1.2	10.6
2018-05-23	04:59:00	44	C	air	1.2	11.1
2018-05-23	05:59:00	44	C	air	1.2	12.6
2018-05-23	06:59:00	44	C	air	1.2	15.1
2018-05-23	07:59:00	44	C	air	1.2	18.1
2018-05-23	08:59:00	44	C	air	1.2	18.1
2018-05-23	09:59:00	44	C	air	1.2	22.6
2018-05-23	10:59:00	44	C	air	1.2	27.6
2018-05-23	11:59:00	44	C	air	1.2	32.6
2018-05-23	12:59:00	44	C	air	1.2	28.6
2018-05-23	13:59:00	44	C	air	1.2	30.1
2018-05-23	14:59:00	44	C	air	1.2	25.1
2018-05-23	15:59:00	44	C	air	1.2	19.1
2018-05-23	16:59:00	44	C	air	1.2	20.1
2018-05-23	17:59:00	44	C	air	1.2	25.6
2018-05-23	18:59:00	44	C	air	1.2	22.6
2018-05-23	19:59:00	44	C	air	1.2	17.1
2018-05-23	20:59:00	44	C	air	1.2	16.1
2018-05-23	21:59:00	44	C	air	1.2	16.1
2018-05-23	22:59:00	44	C	air	1.2	15.6
2018-05-23	23:59:00	44	C	air	1.2	15.1
2018-05-24	00:59:00	44	C	air	1.2	14.6
2018-05-24	01:59:00	44	C	air	1.2	14.6
2018-05-24	02:59:00	44	C	air	1.2	14.6
2018-05-24	03:59:00	44	C	air	1.2	14.6
2018-05-24	04:59:00	44	C	air	1.2	12.6
2018-05-24	05:59:00	44	C	air	1.2	15.1
2018-05-24	06:59:00	44	C	air	1.2	17.1
2018-05-24	07:59:00	44	C	air	1.2	26.6
2018-05-24	08:59:00	44	C	air	1.2	30.6
2018-05-24	09:59:00	44	C	air	1.2	32.6
2018-05-24	10:59:00	44	C	air	1.2	26.1
2018-05-24	11:59:00	44	C	air	1.2	32.1
2018-05-24	12:59:00	44	C	air	1.2	30.1
2018-05-24	13:59:00	44	C	air	1.2	29.6
2018-05-24	14:59:00	44	C	air	1.2	28.1
2018-05-24	15:59:00	44	C	air	1.2	26.1
2018-05-24	16:59:00	44	C	air	1.2	30.1
2018-05-24	17:59:00	44	C	air	1.2	23.6
2018-05-24	18:59:00	44	C	air	1.2	26.6
2018-05-24	19:59:00	44	C	air	1.2	18.6
2018-05-24	20:59:00	44	C	air	1.2	14.6
2018-05-24	21:59:00	44	C	air	1.2	14.6
2018-05-24	22:59:00	44	C	air	1.2	13.6
2018-05-24	23:59:00	44	C	air	1.2	12.6
2018-05-25	00:59:00	44	C	air	1.2	12.1
2018-05-25	01:59:00	44	C	air	1.2	10.1
2018-05-25	02:59:00	44	C	air	1.2	10.1
2018-05-25	03:59:00	44	C	air	1.2	9.1
2018-05-25	04:59:00	44	C	air	1.2	9.6
2018-05-25	05:59:00	44	C	air	1.2	16.1
2018-05-25	06:59:00	44	C	air	1.2	21.1
2018-05-25	07:59:00	44	C	air	1.2	24.6
2018-05-25	08:59:00	44	C	air	1.2	28.6
2018-05-25	09:59:00	44	C	air	1.2	31.6
2018-05-25	10:59:00	44	C	air	1.2	32.6
2018-05-25	11:59:00	44	C	air	1.2	29.6
2018-05-25	12:59:00	44	C	air	1.2	31.1
2018-05-25	13:59:00	44	C	air	1.2	32.6
2018-05-25	14:59:00	44	C	air	1.2	34.1
2018-05-25	15:59:00	44	C	air	1.2	33.6
2018-05-25	16:59:00	44	C	air	1.2	33.1
2018-05-25	17:59:00	44	C	air	1.2	32.6
2018-05-25	18:59:00	44	C	air	1.2	24.6
2018-05-25	19:59:00	44	C	air	1.2	22.1
2018-05-25	20:59:00	44	C	air	1.2	17.6
2018-05-25	21:59:00	44	C	air	1.2	16.6
2018-05-25	22:59:00	44	C	air	1.2	14.6
2018-05-25	23:59:00	44	C	air	1.2	14.6
2018-05-26	00:59:00	44	C	air	1.2	13.6
2018-05-26	01:59:00	44	C	air	1.2	13.6
2018-05-26	02:59:00	44	C	air	1.2	14.1
2018-05-26	03:59:00	44	C	air	1.2	12.1
2018-05-26	04:59:00	44	C	air	1.2	11.6
2018-05-26	05:59:00	44	C	air	1.2	15.6
2018-05-26	06:59:00	44	C	air	1.2	22.1
2018-05-26	07:59:00	44	C	air	1.2	27.6
2018-05-26	08:59:00	44	C	air	1.2	31.6
2018-05-26	09:59:00	44	C	air	1.2	32.6
2018-05-26	10:59:00	44	C	air	1.2	34.6
2018-05-26	11:59:00	44	C	air	1.2	32.6
2018-05-26	12:59:00	44	C	air	1.2	32.1
2018-05-26	13:59:00	44	C	air	1.2	32.1
2018-05-26	14:59:00	44	C	air	1.2	31.1
2018-05-26	15:59:00	44	C	air	1.2	31.6
2018-05-26	16:59:00	44	C	air	1.2	33.6
2018-05-26	17:59:00	44	C	air	1.2	31.1
2018-05-26	18:59:00	44	C	air	1.2	22.6
2018-05-26	19:59:00	44	C	air	1.2	20.1
2018-05-26	20:59:00	44	C	air	1.2	19.6
2018-05-26	21:59:00	44	C	air	1.2	18.6
2018-05-26	22:59:00	44	C	air	1.2	18.1
2018-05-26	23:59:00	44	C	air	1.2	16.1
2018-05-27	00:59:00	44	C	air	1.2	14.6
2018-05-27	01:59:00	44	C	air	1.2	14.1
2018-05-27	02:59:00	44	C	air	1.2	13.1
2018-05-27	03:59:00	44	C	air	1.2	12.6
2018-05-27	04:59:00	44	C	air	1.2	12.1
2018-05-27	05:59:00	44	C	air	1.2	15.1
2018-05-27	06:59:00	44	C	air	1.2	19.6
2018-05-27	07:59:00	44	C	air	1.2	30.1
2018-05-27	08:59:00	44	C	air	1.2	33.6
2018-05-27	09:59:00	44	C	air	1.2	35.6
2018-05-27	10:59:00	44	C	air	1.2	27.1
2018-05-27	11:59:00	44	C	air	1.2	27.6
2018-05-27	12:59:00	44	C	air	1.2	30.1
2018-05-27	13:59:00	44	C	air	1.2	29.6
2018-05-27	14:59:00	44	C	air	1.2	32.6
2018-05-27	15:59:00	44	C	air	1.2	37.1
2018-05-27	16:59:00	44	C	air	1.2	35.1
2018-05-27	17:59:00	44	C	air	1.2	32.1
2018-05-27	18:59:00	44	C	air	1.2	27.6
2018-05-27	19:59:00	44	C	air	1.2	22.6
2018-05-27	20:59:00	44	C	air	1.2	19.6
2018-05-27	21:59:00	44	C	air	1.2	19.6
2018-05-27	22:59:00	44	C	air	1.2	20.6
2018-05-27	23:59:00	44	C	air	1.2	16.1
2018-05-28	00:59:00	44	C	air	1.2	15.6
2018-05-28	01:59:00	44	C	air	1.2	15.6
2018-05-28	02:59:00	44	C	air	1.2	15.6
2018-05-28	03:59:00	44	C	air	1.2	15.6
2018-05-28	04:59:00	44	C	air	1.2	15.1
2018-05-28	05:59:00	44	C	air	1.2	17.6
2018-05-28	06:59:00	44	C	air	1.2	17.6
2018-05-28	07:59:00	44	C	air	1.2	20.6
2018-05-28	08:59:00	44	C	air	1.2	23.1
2018-05-28	09:59:00	44	C	air	1.2	25.6
2018-05-28	10:59:00	44	C	air	1.2	33.1
2018-05-28	11:59:00	44	C	air	1.2	29.6
2018-05-28	12:59:00	44	C	air	1.2	33.1
2018-05-28	13:59:00	44	C	air	1.2	32.1
2018-05-28	14:59:00	44	C	air	1.2	35.6
2018-05-28	15:59:00	44	C	air	1.2	37.1
2018-05-28	16:59:00	44	C	air	1.2	33.6
2018-05-28	17:59:00	44	C	air	1.2	32.6
2018-05-28	18:59:00	44	C	air	1.2	26.1
2018-05-28	19:59:00	44	C	air	1.2	22.1
2018-05-28	20:59:00	44	C	air	1.2	20.6
2018-05-28	21:59:00	44	C	air	1.2	20.6
2018-05-28	22:59:00	44	C	air	1.2	19.6
2018-05-28	23:59:00	44	C	air	1.2	18.6
2018-05-29	00:59:00	44	C	air	1.2	18.1
2018-05-29	01:59:00	44	C	air	1.2	16.1
2018-05-29	02:59:00	44	C	air	1.2	17.6
2018-05-29	03:59:00	44	C	air	1.2	18.1
2018-05-29	04:59:00	44	C	air	1.2	17.1
2018-05-29	05:59:00	44	C	air	1.2	16.1
2018-05-29	06:59:00	44	C	air	1.2	16.1
2018-05-29	07:59:00	44	C	air	1.2	16.6
2018-05-29	08:59:00	44	C	air	1.2	16.6
2018-05-29	09:59:00	44	C	air	1.2	18.6
2018-05-29	10:59:00	44	C	air	1.2	23.6
2018-05-29	11:59:00	44	C	air	1.2	27.1
2018-05-29	12:59:00	44	C	air	1.2	27.1
2018-05-29	13:59:00	44	C	air	1.2	27.1
2018-05-29	14:59:00	44	C	air	1.2	33.1
2018-05-29	15:59:00	44	C	air	1.2	36.1
2018-05-29	16:59:00	44	C	air	1.2	36.6
2018-05-29	17:59:00	44	C	air	1.2	25.6
2018-05-29	18:59:00	44	C	air	1.2	29.6
2018-05-29	19:59:00	44	C	air	1.2	20.1
2018-05-29	20:59:00	44	C	air	1.2	18.1
2018-05-29	21:59:00	44	C	air	1.2	15.6
2018-05-29	22:59:00	44	C	air	1.2	14.6
2018-05-29	23:59:00	44	C	air	1.2	13.6
2018-05-30	00:59:00	44	C	air	1.2	13.6
2018-05-30	01:59:00	44	C	air	1.2	13.1
2018-05-30	02:59:00	44	C	air	1.2	13.1
2018-05-30	03:59:00	44	C	air	1.2	13.1
2018-05-30	04:59:00	44	C	air	1.2	13.1
2018-05-30	05:59:00	44	C	air	1.2	16.6
2018-05-30	06:59:00	44	C	air	1.2	20.6
2018-05-30	07:59:00	44	C	air	1.2	28.1
2018-05-30	08:59:00	44	C	air	1.2	31.6
2018-05-30	09:59:00	44	C	air	1.2	31.6
2018-05-30	10:59:00	44	C	air	1.2	31.6
2018-05-30	11:59:00	44	C	air	1.2	33.1
2018-05-30	12:59:00	44	C	air	1.2	33.1
2018-05-30	13:59:00	44	C	air	1.2	31.6
2018-05-30	14:59:00	44	C	air	1.2	38.6
2018-05-30	15:59:00	44	C	air	1.2	26.6
2018-05-30	16:59:00	44	C	air	1.2	26.1
2018-05-30	17:59:00	44	C	air	1.2	31.1
2018-05-30	18:59:00	44	C	air	1.2	23.6
2018-05-30	19:59:00	44	C	air	1.2	21.1
2018-05-30	20:59:00	44	C	air	1.2	19.6
2018-05-30	21:59:00	44	C	air	1.2	18.6
2018-05-30	22:59:00	44	C	air	1.2	16.6
2018-05-30	23:59:00	44	C	air	1.2	16.6
2018-05-31	00:59:00	44	C	air	1.2	16.6
2018-05-31	01:59:00	44	C	air	1.2	16.1
2018-05-31	02:59:00	44	C	air	1.2	16.1
2018-05-31	03:59:00	44	C	air	1.2	14.6
2018-05-31	04:59:00	44	C	air	1.2	16.1
2018-05-31	05:59:00	44	C	air	1.2	16.1
2018-05-31	06:59:00	44	C	air	1.2	18.1
2018-05-31	07:59:00	44	C	air	1.2	20.1
2018-05-31	08:59:00	44	C	air	1.2	21.1
2018-05-31	09:59:00	44	C	air	1.2	26.6
2018-05-31	10:59:00	44	C	air	1.2	26.1
2018-05-31	11:59:00	44	C	air	1.2	27.1
2018-05-31	12:59:00	44	C	air	1.2	29.1
2018-05-31	13:59:00	44	C	air	1.2	27.6
2018-05-31	14:59:00	44	C	air	1.2	33.1
2018-05-31	15:59:00	44	C	air	1.2	31.1
2018-05-31	16:59:00	44	C	air	1.2	23.6
2018-05-31	17:59:00	44	C	air	1.2	19.6
2018-05-31	18:59:00	44	C	air	1.2	15.1
2018-05-31	19:59:00	44	C	air	1.2	15.1
2018-05-31	20:59:00	44	C	air	1.2	14.6
2018-05-31	21:59:00	44	C	air	1.2	14.1
2018-05-31	22:59:00	44	C	air	1.2	13.6
2018-05-31	23:59:00	44	C	air	1.2	13.1
2018-06-01	00:59:00	44	C	air	1.2	13.1
2018-06-01	01:59:00	44	C	air	1.2	11.6
2018-06-01	02:59:00	44	C	air	1.2	12.6
2018-06-01	03:59:00	44	C	air	1.2	11.6
2018-06-01	04:59:00	44	C	air	1.2	11.6
2018-06-01	05:59:00	44	C	air	1.2	17.6
2018-06-01	06:59:00	44	C	air	1.2	22.6
[truncated: 24,569 more rows]
